# Supplementary material for: Sequences of 95 humanMHChaplotypes reveal extreme coding variation in genes other than highly polymorphicHLA class IandII
Source: HighWire-hosted journal article supplement (doi:10.1101/gr.213538.116), 2017-03-30
Supplement: Supplemental_Material.docx [file Supplemental_Material.docx]

**Supplemental Information**

**1*. HLA* nomenclature**

**2. Complement C4 polymorphism and nomenclature**

**3. Preparation of sequencing libraries**

**4. Design of capture oligonucleotide probes**

**5. Enrichment of *HLA* genomic region**

**6. Paired-end sequencing**

**7. Estimate of enrichment efficiency**

**8. Measuring sequence coverage and generating a modified COX haplotype**

**9. Optimizing the scaffolding parameters**

**10. *HLA class I* and *II* genotypes**

**11. Assessment of *MHC* region CDS alleles from read data**

**12. Legends for Supplemental Tables**

**13. Legends for Supplemental Figures**

**14. References for Supplemental Material**

***1. HLA* nomenclature**

Throughout this paper any unique DNA sequence that spans an *MHC* region coding DNA sequence (CDS) is considered a distinct allele and those that encode a unique protein sequence define an allotype.

The polymorphic HLA class I and II proteins were originally detected and defined using serological methods and human alloantibodies collected from multiparous women and recipients of multiple blood transfusions. In the 1960s the World Health Organization (WHO) Nomenclature Committee for factors of the HLA system was established to provide a rational and flexible system of nomenclature that could be used by transplant physicians in matching donors and recipients for clinical transplantation (Robinson et al. 2015). During the 1980s, the serological picture of HLA class I and II polymorphisms began to be replaced by analysis of the nucleotide differences that distinguish the alleles of HLA genes. The ImmunoPolymorphism Database (IPD) was established to compile and curate these sequences (http://www.ebi.ac.uk/ipd/imgt/hla/).

The contemporary nomenclature uses a hierarchical set of fields to name the *HLA* *class I* and *II* alleles. The fields are separated by colons and contain as many different digits as is needed to distinguish all alleles. The first field distinguishes the major alleles, which differ by multiple nucleotide and amino-acid substitutions (e.g. *HLA-A*01* and *HLA-A*02*). For HLA class I, the allele groups correspond well, but not perfectly, to the serological antigens. For HLA class II, serological analysis was less effective and so there is less correlation between alleles and antigens. The second field distinguishes the subtypes of each major allele, which encode allotypes that differ by one or more amino-acid substitutions (e.g. HLA-A*02:01 and HLA-A*02:153). The third field distinguishes subtypes that encode proteins of identical amino-acid sequence, but differ by one or more synonymous substitutions within the protein-encoding exons (e.g. *HLA-A*02:01:01* and *HLA-A*02:01:02*). The fourth field distinguishes subtypes that have identical coding-region sequence, but differ by one or more nucleotide substitutions within introns or the transcribed 3' and 5' flanking regions (e.g. *HLA-A*02:01:01:01* and *HLA-A*02:01:01:02*). In addition, suffix letters are used to denote known expression variants (e.g. N denotes a 'Null' allele, for which the encoded protein is not expressed at the cell surface). Because sequence-based clinical *HLA* typing is limited to exons 2 and 3 of *HLA class I* and exon 2 of *HLA class II* genes, complete coding region sequences have only been obtained for a minority (< 3%) of *HLA class I* and *II* alleles. *HLA-DRB3, 4, 5* exhibit gene content polymorphism; one of *HLA-DRB3*, *4*, or *5* is present on an *MHC* haplotype or they are all absent (Supplemental Fig. S3).

The WHO Nomenclature Committee for factors of the HLA system and the IPD is also responsible for the naming and curation of some of the less-polymorphic *HLA* genes. These genes either encode proteins that are related in structure and evolution to HLA class I and II or proteins that facilitate peptide binding to HLA class I or II. These genes comprise the *HLA class I* genes *HLA-E*, *-F*, and *-G*; the *HLA class I-like* genes *MICA* and *MICB*; the *HLA class II* genes *HLA-DOA*, *-DOB*, -*DMA*, and -*DMB*; and the peptide transporter genes *TAP1* and *TAP2*.

**2. Complement C4 polymorphism and nomenclature**

The *C4A* and *C4B* genes are located between the *HLA-B* and *HLA*-*DRB1* genes in a region of modular structural diversity (Horton et al. 2004; Yang et al. 2007). Haplotypes vary in having 1-4 copies of the *C4A* and/or *C4B* gene, which have 41 exons. Functionally significant polymorphisms include the C4A and C4B dimorphism determined by four amino acid substitutions encoded by exon 26andthe complex Chido/Rodgers blood group determinants encoded in exons 25-28 (Wu et al. 2007; Yang et al. 2007). The C4 isoforms are functionally distinguished because of the substitution of four charged amino-acids that cause C4A to be more stable than C4B (Yang et al. 2007). Further substitutions that distinguish C4A or C4B allotypes also have functional effects, as does a 6kbp HERV-K insertion in intron 9 of some alleles that reduces C4 expression (Yang et al. 2007). *C4A/C4B* alleles are designated as either L or S according to the presence (L) or absence (S) of the insertion.

**3. Preparation of sequencing libraries**

For each sample, 1ug of genomic DNA (as determined by Qubit; Life Technologies, NY) was sheared into ~700bp fragments using a Covaris S220 instrument (Covaris, Woburn, MA) as follows: Duty cycle 5%, Intensity 3, 200 cycles/burst, duration 70s. Sheared DNA fragments were then subjected to the TruSeq DNA Sample Prep v2 Low Throughput Protocol (Illumina Inc. San Diego, CA). First, sheared DNA fragments were end-repaired and purified with 160ul of diluted AMPure XP beads (136ul beads and 24ul H20). Libraries were then ‘A-tailed’ and ligated to indexed sequencing adaptors. Following adaptor ligation, automated gel size selection was performed using the Pippin Prep instrument and 1.5% agarose gel cassettes (Sage Science. Beverly, MA) using settings to obtain a median library insert size of ~650bp. After elution from the Pippin Prep, 0.7x AMPure XP bead purification was performed (e.g. 30ul DNA library and 21ul Ampure XP beads) followed by PCR amplification with the following conditions: Initial denaturation at 98oC for 30s, 12 cycles of 98oC for 10s, 60oC for 30s, 72oC for 60s, and a final extension at 72oC for 5min. Following PCR, a 0.7x AMPure XP bead purification was performed.

**4. Design of capture oligonucleotide probes**

The human reference *MHC* region haplotype sequence is from PGF. COX is the other completed (alt) reference, and has a similar haplotype but it is homozygous throughout the *HLA* region, whereas the PGF haplotype is not (Norman et al. 2015). We targeted the beginning of PGF to the end of COX, which is equivalent to (GRCh38/hg38) Chr6:28510120-33532223. Two algorithms were used to design sets of 80-mer oligonucleotide capture probes. Algorithm 1 was used to target the complete *MHC* haplotype sequence of the COX B cell line (GL000251, NT_113891). The algorithm ensured that the probes did not overlap, that the mean distance between probes was 150bp, and that no two probes had more than 90% sequence identity. This main pool of probes consisted of 33,038 oligonucleotides specific for *HLA*.

Algorithm 2, which performs end-to-end tiling, with strand-swapping, to favor pyrimidine rich probes, was used to design probes to supplement the main pool. The Supplemental probes were designed from the complete *MHC* haplotype sequence of the PGF cell line and the partial *MHC* haplotype sequences of the DBB, QBL, MANN, SSTO, MCF and APD cell lines (Horton et al. 2004). Probes that differed by more than three nucleotides from the corresponding segment of either reference haplotype were selected for use. The complete probe set consisted of 48,023 oligonucleotides. The library preparation, capture and sequencing were all performed as described in the Supplemental Information.

**5. Enrichment of the *MHC* genomic region**

Enrichment for *MHC* region sequences was performed with a modified version of the TruSeq enrichment protocol (Illumina Inc. San Diego, CA), a solution based target capture assay. Each hybridization mix (100ul) contained six uniquely indexed sequencelibraries (500ng each), 50 pM of each biotinylated capture probe and hybridization buffer (CT1, and all subsequent buffers from Illumina Inc. San Diego, CA). The hybridization mix was heated to 95oC for 5mins, 70oC for 4min, and then gradually decreased to 58oC over the course of 8 hours and incubated at 58oC for an additional 10 hours. The following day, sequencing libraries of biotinylated oligonucleotides were bound to streptavidin magnetic beads (Illumina Inc.) that had been concentrated 3-fold (beads contained in 300ul of SMB were concentrated to 100ul by removal of 200ul of buffer). Binding of oligonucleotides to beads was performed by 30min incubation with agitation at 1000rpm on a plate shaker at room temperature.

The streptavidin beads were removed from solution using a magnetic separator and then washed with 100ul of WS1 buffer. Bead washing was achieved by moving the strip tube back-and-forth eight times on the magnetic separator. Subsequently, the beads were washed three times with 100ul of WS2 buffer for 30 minutes, once at room temperature, then twice at 52oC. Two washes were then performed with 100ul of WS3 buffer at room temperature. Enriched sequencing libraries were eluted from the washed beads in 30ul of elution buffer ET1, with subsequent neutralization by the addition of 5.6ul of ET2 buffer. The process was then repeated.

10ul of enriched DNA preparation were subject to PCR amplification in a 50ul reaction mix containing standard Illumina library-specific primers, 1x Titanium Taq Polymerase, 1x Titanium Taq Buffer (Clontech Laboratories Inc. Mountain View, CA), 5% DMSO and 0.2mM dNTPs. PCR cycling was performed as follows: 95oC for 3 min, 12 cycles of 95oC for 20s, 57oC for 30s, and 72oC for 60s with a final elongation step at 72oC for 5min. Amplified material was purified with 45ul of AMPure XP beads and eluted in 30ul of RSB (Illumina Inc. San Diego, CA).

**6. Paired-end sequencing**

The enriched libraries were sequenced using a HiSeq2000 instrument and sequencing chemistry (Illumina Inc. San Diego, CA). Samples were clustered and paired-end sequencing performed with the TruSeq SBSv3-HS kit (Illumina Inc. San Diego, CA). After removal of indexing, the sequencing read length was 2 x 101bp. Each enriched sample pool (containing templates from six cell lines) was sequenced on one HiSeq Lane. In addition, the eight ‘Sanger reference’ cells were each sequenced on single lanes.

**7. Estimate of enrichment efficiency**

Following sequencing, a mean of 28.8M read pairs per cell line passed the initial quality filter (flagged “:N:” in read identifier) (Supplemental Table. S1). A subset of 250,000 of these read-pairs per individual were aligned to the human reference genome (hg19) using BWA MEM(Li and Durbin 2009) with default parameters. The number of reads mapping within the target coordinates was then counted. The mean enrichment efficiency, measured as percent of reads on target, was 13.1% (6-20%). An enrichment efficiency of 15% is equivalent to a ~100-fold reduction in the number of sequenced fragments required to characterize the *MHC* region from non-enriched genomic DNA. The enrichment efficiency increased through the course of our study (to ~25%) and the conditions describe above represent the optimized protocol.

**8. Measuring sequence coverage and generating a modified COX haplotype**

For initial optimization we extracted DNA from a low passage number aliquot (p=7) of the COX cell line. Read-pairs generated from the COX cell line that matched exactly (-v0) to the COX reference haplotype were harvested and mapped using Bowtie 1.0.0 (Langmead et al. 2009). Following this stringent alignment process, duplicate read pairs were removed with Picard Tools 1.129 (http://broadinstitute.github.io/picard/). The process was then repeated, but with the change that a one base-pair mismatch between a read pair and the reference was acceptable, with a cap set at 250X (namely, six regions having >250x read depth from the v0 were masked). This strategy identified 18 single nucleotide differences from the COX reference haplotype (Supplemental Fig. S4).

Using a freshly-prepared genomic library from COX, the capture process was repeated and sequenced using a MiSeq instrument (version 2; 2x250 read pairs: Illumina Inc) and also using a PacBio RSII instrument (Pacific Biosciences, Menlo Park CA). In each case all 18 differences were confirmed (in our subsequent analyses they were further confirmed by their presence in the four other cell lines with the same *HLA* haplotypes as COX, these are L0541265, PF04015, STEINLIN and VAVY). During the contig sorting process (described in the ‘Contigs’ section of Methods), we also identified a 4kb insertion in the COX *MHC* relative to the COX reference haplotype. This insertion was also identified in the four cells that have the same haplotype as COX as well as six of seven alternatives haplotypes sequenced previously (APD, MCF, MOU, PGF, QBL and SSTO). Because the passage number of the COX cell line we used was very low, the 19 differences (18 SNPs and one insertion) between the COX haplotype we sequenced and the previously sequenced version likely reflect artefacts in the reference that were introduced during culture and/or the BAC/sequencing process.

**9. Optimizing the scaffolding parameters**

From the COX sequence read data we generated *de novo* 2,387 contigs, covering 98.98% of the target haplotype. Following filtering to remove those contigs having potential to map outside the *HLA* region, there were 2,042 contigs, with an N50 value of 4,473bp, and which covered 98.2% of the target haplotype. To make the scaffolds we counted how many read pairs (linkers) could join any given pair of contigs and to select which contigs were joined to make scaffolds we set a threshold minimum number of these linkers required (Supplemental Fig. S5). To determine the optimum threshold, we titrated this value against the success of the assembly (as determined by two measures of potential error) and observed no significant improvement above a threshold of 150 linkers. The optimized joining algorithm produced 560 scaffolds and an N50 of 23,855bp from the input COX contigs, and with 7-20 potential join errors. We then targeted the VAVY cell line, because it has an identical haplotype to COX through the first 4.2Mbp of the target region (Norman et al. 2015), but was sequenced to an approximately six-fold lower read depth (Supplemental Table S1). For VAVY the optimum threshold of 80 linkers produced 997 scaffolds covering 95.9% of the haplotype and 6-12 potential join errors. All joins are indicated in the final deposited haplotype sequence.

**10. *HLA class I* and *II* genotypes**

Filters for harvesting reads specific for the *HLA* *class I* and *II* genes were constructed using all ‘genomic’ (full gene) and ‘nucleotide’ (exon) sequences available at the IPD (October 2014 release (Robinson et al. 2015)) for the *HLA-A, -B, -C, -DRB1, -DRB3, -DRB4, -DRB5, -DQA1, -DQB1, -DPA1* and -*DPB1* genes. The filters were supplemented with *HLA-DPA1* genes extracted from fosmid sequences having the following Genbank ID numbers: AC246052, AC244160 and KJ657694-7. The reads were harvested using Bowtie 1.0.0 (Langmead et al. 2009) with non-stringent parameters (-v3, -e90 and with temporary trimming) and then filtered again stringently to remove reads that could map to any of the non-classical *HLA* genes (e.g. *HLA-E, -F, -G*) or pseudogenes (e.g. *HLA-H, -I*, *-J*). Additional filters were made to remove reads corresponding to the *HLA-Y* pseudogene. To do this we used*HLA-Y* sequences extracted from GenBank ID numbers: AY436316, AY344232, Y18651 and HM629930. The identity of each *HLA class I* and *II* allele in the cell panel was determined using NGSengine 1.7.0 (GenDX software, Utrecht, NL), kindly provided by Wietse Mulder and Erik Rozemuller. Also identified were polymorphisms in regulatory elements outside the regions covered by sequence-based *HLA* typing. For example, we genotyped the mir148a miRNA binding site, 260bp downstream from the stop codon, that regulates HLA-C expression (Kulkarni et al. 2011) (Supplemental Table S2).

**11. Assessment of *MHC* region coding sequence alleles from read data**

Reference sequences for each of the ‘RefSeq’ protein coding genes in the target region, including 1000bp up and downstream of each gene, were obtained using the UCSC table browser, as were their exon sequences. For the latter, we took the complete coding sequences (the CDS) from start to stop codon of the reference allele in each case. 142 genes were targeted by this process; analyzed separately from this were the 23 highly polymorphic *HLA class I* and *II* genes, other genes curated by the IPD,and the complement *C4A* and *C4B* genes. The coordinates of the exons relative to their respective RefSeq gene sequences were then determined using BLAT (Kent 2002) with manual correction using Bioedit (http://www.mbio.ncsu.edu/bioedit/) for exons shorter than 32 bp. Using these coordinates, the CDS were extracted from the gene sequences. The CDS alleles of the IHWG cell lines were determined using two independent methods: first, using a modified form of the PING pipeline that was validated in the analysis of *KIR* (Norman et al. 2016) and second, from the *de novo* generated contigs. The latter process was designed to detect indels of any size; 17% of the target genes had exons with indel polymorphism. The largest we detected using this method were 1860bp in-frame deletions within exon 2 of *MUC22* (Supplemental Table S5).

Using Bowtie 1.0.0 and the complete hg19 human genome as the reference, sequence reads that map outside the target *MHC* region with no mismatch were binned into a separate pool (off-target reads). Reads that mapped to specific target reference genes were then harvested from the remaining pool using Bowtie, filtered again to remove reads that could map elsewhere within the *HLA* target region, and then aligned back to the reference gene sequence. In this case we used the coordinates from the high-density SNP array data (Norman et al. 2015) to ensure analysis of only those genes that we knew to be homozygous for the specific gene in any given cell line; the homozygous CDS were then extracted directly from the resulting vcf files. In a parallel approach, the de novo-assembled contigs (filtered as described above) were aligned to the reference genes and the resulting alignments were processed using Staden Gap 5 (Bonfield and Whitwham 2010) to produce a consensus sequence for each gene and for each cell line. The contigs were aligned using BWA MEM using defaults except k=101 (k=201 for *MUC22*). The final extracted gene sequences were aligned against their respective reference versions using MAFFT or ClustalW and manual correction when necessary.

We performed a search for each of the resulting CDS in the NCBI nucleotide database using BLAST (blastn -db nr) and harvested the best hit (Supplemental Table S3). For the most part (135/140 genes) the gene and exon sequences obtained from the RefSeq reference were equivalent to those we obtained from the PGF cell line (the human reference sequence). In three cases the human reference sequence was not the same as that obtained from PGF, but was identified first in an alt_reference haplotype instead. These were *AGER* and *CDSN* (COX) and *PHF1* (APD) (Supplemental Table S3). In two cases (*RNF5* and *DPCR1*) the RefSeq CDS was not identified in any of the cell lines, but the sequences we obtained from COX and PGF matched those from the human genome data. Forty-one of the CDS in the *MHC* region were invariant following previous analysis of the eight MHC-consortium haplotypes (Horton et al. 2004). Thirty-two of these remained invariant in the sequence data we generated (Supplemental Table S3).

**12. Legends for Supplemental Tables**

**Supplemental Table S1. ENA and ImmPort accession numbers and metrics**

(Excel Spreadsheet)

A. Shown are the accession numbers (http://www.ebi.ac.uk/ena/) of the sequence data from the 95 IHWG cell lines. Center columns show the number of reads obtained and the enrichment metrics. At the right are the ImmPort ID numbers (https://immport.niaid.nih.gov/immportWeb/) of the sequence data.

B. Shown are the assembly accession numbers. Left, the number of *de-novo* contigs obtained plus the N50 values and the percentage of the COX haplotype represented in the contigs. Right, accession numbers for the ordered scaffolds (haplotypes) generated from the contig and read data; the length is equivalent to the corresponding homozygous tract measured using hg19 coordinates (Methods). The number of gaps in the final sequence is indicated. In these final sequences, a string of 20 or less Ns indicates a join was made with GapFiller, and a string of 40 Ns indicates scaffolds that were ordered by mapping but the gaps were not filled in.

**Supplemental Table S2. High-resolution genotypes of *HLA class I* and *II* genes sequenced from 95 IHWG cell lines**

(Excel Spreadsheet)

A. Shown are the genotypes for *HLA class I* and *II* obtained from 95 IHWG cell lines using the enrichment and sequencing process. Homozygous genotypes are indicated with gray text for the second allele (two copies of the allele are assumed to be present). Highlighted in yellow are the CDS alleles discovered for the first time here (described in panel C). When analyzed at two-field resolution the alleles shown are consistent with those previously reported (http://www.ebi.ac.uk/ipd/imgt/hla/), with exception of two allele calls that are indicated in red text. WJR076 genotyped as *HLA-DRB1*16:02* using independent methods, instead of the reported *HLA-DRB1*16:01*. AMALA is reported as *HLA-DPB1*04/*94* heterozygous (http://www.ebi.ac.uk/ipd/imgt/hla/), but we showed it as homozygous *-DPB1*04:02*, which is consistent with this sample being homozygous throughout the *MHC* region (Norman et al. 2015). Shaded in olive green are alleles that were not previously resolved to two-field resolution. Cell line name shaded brown indicates presence of *HLA-Y* (Norman et al. 2015). The allele compositions were determined using NGSengine (http://gendx.com/products/ngsengine).

B. Shows the alleles of the non-classical, IPD curated, *MHC* region genes as determined using NGSengine 1.7.0. Yellow indicates novel full gene sequence alleles; only the first cell line (alphabetically) having each sequence is indicated, and the GenBank accession number is shown at the right of each one. *Het*- indicates sample is heterozygous for that gene.

C. Shown are the coding-sequence alleles of classical *HLA* genes that were identified for the first time here. The sequences were submitted to GenBank and the officially designated names from the IPD are shown at the center. To the right are the closest known allele and the coding changes that distinguish the new from the closest allele. Novel substitutions that intersect with exons only were submitted.

D. Shows the alleles of the mir148a binding site, which is located 260bp 3’ of the HLA-C stop codon (Kulkarni et al. 2011). Two of the alleles (C1 and C7; shown in red) permit binding by the mir148a miRNA and thus have reduced expression of HLA-C, whilst those that share sequence with C2 (shown in green) do not permit mir148a binding. Virtual probes used to genotype the mir148a binding site are shown at the right.

**Supplemental Table S3. Genes in the target *HLA* region**

(Excel spreadsheet)

A. List of RefSeq protein expressing genes in the target *MHC* region and their transcript start and finish coordinates (hg19). OMIM numbers and full protein names are shown at the right. *HLA class I* and *II* genes are shown in red.

B. Shown are all the CDS alleles identified in the panel, their GenBank accession numbers, and results of BLAST searches. Shading denotes the reference allele (huref), which is (green) when identified here in PGF and (blue) when identified in another cell line. The alleles are named in order of their identification in the remaining MHC consortium haplotypes (APD, COX, DBB, MCF, MOU, QBL, SSTO), and then alphabetically by the remaining cell lines.

C. Lists 32 genes that are predicted to encode invariant polypeptide sequences in the IHWG panel of 95 cell lines.

**Supplemental Table S4. Haplotypes of all genes in the *HLA* target region**

(Excel spreadsheet)

Shows the CDS alleles for all of the haplotypes characterized. (olive) cell is homozygous for the hg19 reference allele, (blue) homozygous for a non-reference allele, (yellow) the gene is absent and (red) heterozygous. The alleles are named as described for Supplemental Table S3B, where their GenBank Accession numbers are also given. At the top, green shading indicates the alleles were characterized only from scaffold alignment, and not by both the methods described in the text.

**Supplemental Table S5. CDS with significant indel polymorphism or structural variation**

(Excel spreadsheet)

Shown are the alignments of nucleotide differences that distinguish the alleles of three genes with coding indels. Colors denote residues that differ from the reference, and dashes indicate those identical to reference. (Pink) denotes deletion compared to the reference and (green) insertion: the number of base pairs for each is indicated.

A. *MUC22.* The number of amino acids predicted for the mature protein is shown at the right.

B. *NOTCH4*

C. *NOTCH4:* Shows the STR copy number obtained from the IHWG cells, compared with those previously obtained (Dorak et al. 2006). Brown shading indicates three cells with discrepant results, which were further tested by PCR and Sanger sequencing the amplicons –and shown to match our result. The *HLA-DRB1* genotype is shown at the right.

D. Shows the complement *C4A* and *C4B* alleles identified in the IHWG cell panel. At the left are shown the *C4A/C4B* and *L/S* copy number genotypes obtained previously for 40 cells (Wu et al. 2007). Columns 3-5 show the *C4A/B-L/S* genotypes obtained by read depth and ratio in the current study. Columns 7-19 show the traditional C4 d-region genotypes for the antigenic determinants of the Chido/Rodgers blood group system: colored boxes containing dots denote the antigen is present, white boxes indicate the antigen is absent. At the right shows further polymorphism identified from the sequence data; where these correspond to known polymorphism, the dbSNP identifier is given in the top row. Coding changes are given relative to the *C4A* reference sequence (Wu et al. 2007; Yang et al. 2007), identity to reference is denoted with a dot, and difference in color. (syn) – synonymous SNP. The genotypes are given in IUPAC ambiguity code (Y=C+T ..etc). Numbering is from ATG=1 as the first codon. *HLA-B* and *-DRB1* genotypes are given at the right. *HLA-B* – *DRB1* haplotypes that are identical but have different *C4* genotypes are indicated with colored shading

E. Virtual probes used to determine *C4A/C4B* genotypes.

**13. Legends for Supplemental Figures (all pdf)**

**Supplemental Fig. S1. More than 99.96% of base pairs in the target regions were sequenced**

Shown are the coordinates and features of 25 gaps in the COX *MHC* region haplotype. At the right is shown the location of the gaps that occur within the bounds of a gene sequence. Together these gaps comprise less than 0.05% of the reference haplotype. The majority of the gaps (18/25) are in segments of unusually high GC content and most likely result from failure of PCR amplification during library preparation (Benjamini and Speed 2012).

**Supplemental Fig. S2. Enrichment method captures divergent sequences from chimpanzee**

A. Shown are pairwise nucleotide difference plots of all *HLA-A*, *-B* and *-C* alleles, drawn from the IPD (and kindly provided by James Robinson) (Robinson et al. 2015). Orange bars indicate the pairwise difference between the (*Patr-A*, *-B* or *-C*) allele of Clint, and the closest allele of the corresponding gene found in the Sanger 8 sequences (against which the capture probes were designed). Clint is heterozygous for *Patr-A* and *-C* and homozygous for *-B*. Clint also possesses the *Patr-AL* gene, which is highly divergent having 66 nucleotide differences to any *HLA-A* allele in the coding sequence.

B. Shown are plots of the sequence read depth obtained by filtering and mapping reads to the corresponding gene or allele sequence. The highly divergent *Patr-AL* sequence was completely covered by sequencing reads. Also shown are three polymorphic genes subject to further focus this study, *-DRB1*, *-MUC22* and *-NOTCH4*. Red bars indicate the positions of exons.

**Supplemental Fig. S3. A diagram of HLA class II structural variation.**

Shown is a scheme of the *HLA-DRB* region structural diversity. Five configurations are known; they are named after the *HLA-DRB1* allele present on the haplotype where they were first identified. Expressed genes are colored, and in gray are pseudogenes. ‘*DR8*’ is the shortest haplotype, lacking one of the expressed genes and two of the three pseudogenes. ‘*DR4*’ is the longest haplotype. COX has *DR3*, PGF has *DR2*, and SSTO has *DR4*.

**Supplemental Fig. S4. SNPs that distinguish two versions of the COX reference haplotype**

A-B. Shows the 18 single nucleotide differences (A), and the 4kb insertion (B) that distinguish the COX haplotype analyzed here (ALT) from the 2014 reference version (COX2014; NT_113891 GI:568815529). Positions are relative to COX2014. The 4kb segment consists of interspersed *Alu*, LINE and ERV repeat elements.

C. Shows the % coverage obtained from four cell lines that are homozygous and share identity with COX in the *MHC* region (they all have the *HLA* “1-8-3” haplotype). Stringent read alignment was performed as described in the Methods.

**Supplemental Fig. S5. Selecting parameters for contig joining.**

A. Shows the analysis used to determine the optimal number of linkers to use for joining contigs, in order to make scaffolds with a minimal number of potentially false joins. The threshold number of linkers required to make a join is compared (left) to the number of final scaffolds (blue line), two independent estimates of potentially false joins (gray and orange lines) and (right) the final % coverage (green line) and N50 value (purple line). The number of potentially false joins was determined using Quast (Gurevich et al. 2013) (Quast: gray lines) or by identifying scaffolds that did not map perfectly to the reference haplotype using BWA (map: orange lines). The process is described in section 9. *Optimizing the scaffolding parameters.*

**14. References for Supplemental Material**

Benjamini Y, Speed TP. 2012. Summarizing and correcting the GC content bias in high-throughput sequencing. *Nucleic acids research* **40**: e72.

Bonfield JK, Whitwham A. 2010. Gap5--editing the billion fragment sequence assembly. *Bioinformatics* **26**: 1699-1703.

Dorak MT, Shao W, Machulla HK, Lobashevsky ES, Tang J, Park MH, Kaslow RA. 2006. Conserved extended haplotypes of the major histocompatibility complex: further characterization. *Genes and immunity* **7**: 450-467.

Gurevich A, Saveliev V, Vyahhi N, Tesler G. 2013. QUAST: quality assessment tool for genome assemblies. *Bioinformatics* **29**: 1072-1075.

Horton R, Wilming L, Rand V, Lovering RC, Bruford EA, Khodiyar VK, Lush MJ, Povey S, Talbot CC, Jr., Wright MW et al. 2004. Gene map of the extended human MHC. *Nature reviews Genetics* **5**: 889-899.

Kent WJ. 2002. BLAT--the BLAST-like alignment tool. *Genome research* **12**: 656-664.

Kulkarni S, Savan R, Qi Y, Gao X, Yuki Y, Bass SE, Martin MP, Hunt P, Deeks SG, Telenti A et al. 2011. Differential microRNA regulation of HLA-C expression and its association with HIV control. *Nature* **472**: 495-498.

Langmead B, Trapnell C, Pop M, Salzberg SL. 2009. Ultrafast and memory-efficient alignment of short DNA sequences to the human genome. *Genome biology* **10**: R25.

Li H, Durbin R. 2009. Fast and accurate short read alignment with Burrows-Wheeler transform. *Bioinformatics* **25**: 1754-1760.

Norman PJ, Hollenbach JA, Nemat-Gorgani N, Marin WM, Norberg SJ, Ashouri E, Jayaraman J, Wroblewski EE, Trowsdale J, Rajalingam R et al. 2016. Defining KIR and HLA Class I Genotypes at Highest Resolution via High-Throughput Sequencing. *American journal of human genetics* **99**: 375-391.

Norman PJ, Norberg SJ, Nemat-Gorgani N, Royce T, Hollenbach JA, Shults Won M, Guethlein LA, Gunderson KL, Ronaghi M, Parham P. 2015. Very long haplotype tracts characterized at high resolution from HLA homozygous cell lines. *Immunogenetics* **67**: 479-485.

Robinson J, Halliwell JA, Hayhurst JD, Flicek P, Parham P, Marsh SG. 2015. The IPD and IMGT/HLA database: allele variant databases. *Nucleic acids research* **43**: D423-431.

Wu YL, Savelli SL, Yang Y, Zhou B, Rovin BH, Birmingham DJ, Nagaraja HN, Hebert LA, Yu CY. 2007. Sensitive and specific real-time polymerase chain reaction assays to accurately determine copy number variations (CNVs) of human complement C4A, C4B, C4-long, C4-short, and RCCX modules: elucidation of C4 CNVs in 50 consanguineous subjects with defined HLA genotypes. *J Immunol* **179**: 3012-3025.

Yang Y, Chung EK, Wu YL, Savelli SL, Nagaraja HN, Zhou B, Hebert M, Jones KN, Shu Y, Kitzmiller K et al. 2007. Gene copy-number variation and associated polymorphisms of complement component C4 in human systemic lupus erythematosus (SLE): low copy number is a risk factor for and high copy number is a protective factor against SLE susceptibility in European Americans. *American journal of human genetics* **80**: 1037-1054.
