# Supplementary material for: Sequences of 95 humanMHChaplotypes reveal extreme coding variation in genes other than highly polymorphicHLA class IandII
Source: HighWire-hosted journal article supplement (doi:10.1101/gr.213538.116), 2017-03-30
Supplement: Supplemental_Table_S1.xlsx [file Supplemental_Table_S1.xlsx]

## Sheet: A_sequenceruns
							coverage v.s. COX
Sample ID/Cell name	ENA accession (study PRJEB6763)	Experiment accession	Run accession	Pass reads	% on Target	% Duplicate	% >5X	% >10X	ImmPort ID (SDY691, EXP 13735)
31227ABO	ERS509497	ERX525909	ERR566920	22588945	13.525	0.340878	98.2909	97.3735	31227ABO-IHW09061
AKIBA	ERS509498	ERX525910	ERR566921	22675871	13.134	0.319137	95.29	94.0891	AKIBA-IHW09286
AMA1	ERS509499	ERX525911	ERR566922	21022879	13.9338	0.517138	96.4152	95.1543	AMA1-IHW09010
AMALA	ERS509500	ERX525912	ERR566923	12810585	13.8616	0.874557	97.5496	94.8717	AMALA-IHW09064
APD	ERS509501	ERX525913	ERR566924	164251765	9.5752	0.208694	98.6059	98.3656	APD-IHW09291
AWELLS	ERS509502	ERX525914	ERR566925	42364198	10.4706	0.153515	98.3294	97.7886	AWELLS-IHW09090
AZH	ERS509503	ERX525915	ERR566926	25063918	13.986	0.696645	95.0687	93.9588	AZH-IHW09293
BEI	ERS509504	ERX525916	ERR566927	45356105	10.5506	0.0961218	96.8201	96.1863	BEI-IHW09294
BER	ERS509505	ERX525917	ERR566928	19503103	13.8318	0.483991	96.4717	95.1688	BER-IHW09093
BGED	ERS509506	ERX525918	ERR566929	51640079	20.2938	1.68734	96.642	95.9269	BGE-IHW09295
BH	ERS509507	ERX525919	ERR566930	17565375	11.6562	0.360656	96.1679	94.4412	BH-IHW09046
BM09	ERS509508	ERX525920	ERR566931	28543922	13.3118	0.415628	97.1929	96.2276	BM14-IHW09033
BM14	ERS509509	ERX525921	ERR566932	31106948	13.994	0.373343	96.6717	95.7623	BM15-IHW09040
BM15	ERS509510	ERX525922	ERR566933	37422585	14.0376	0.453314	98.8378	98.3588	BM16-IHW09038
BM16	ERS509511	ERX525923	ERR566934	25535068	13.7356	0.197257	98.7636	97.9914	BM21-IHW09043
BM21	ERS509512	ERX525924	ERR566935	27106317	13.7962	0.851987	98.3681	97.6033	BM9-IHW09068
BOLETH	ERS509514	ERX525925	ERR566936	24739898	13.875	0.595886	96.0446	94.3398	BOLETH-IHW09031
BSM	ERS509515	ERX525926	ERR566937	22810804	14.534	0.42264	96.5964	95.3108	BSM-IHW09032
BTB	ERS509516	ERX525927	ERR566938	20372574	13.4982	0.709433	96.8183	95.4155	BTB-IHW09067
CALEGORO	ERS509517	ERX525928	ERR566939	23998867	12.436	0.503138	96.1471	94.8961	CALEGORO-IHW09084
CB6B	ERS509518	ERX525929	ERR566940	49515993	14.0286	1.68992	98.5094	97.9739	CB6B-IHW09060
COX	ERS509520	ERX525930	ERR566941	172045205	10.9776	0.262819	99.8561	99.7599	COX-IHW09022
DBB	ERS509521	ERX525931	ERR566942	146885750	10.9606	0.373816	96.8148	96.4328	DBB-IHW09052
DEMD	ERS509522	ERX525932	ERR566943	29287408	13.514	0.364972	96.7512	95.6267	DEM-IHW09007
DEU	ERS509523	ERX525933	ERR566944	54642694	10.0674	0.0619365	96.2447	95.0326	DEU-IHW09025
DKB	ERS509524	ERX525934	ERR566945	27376869	13.304	0.513954	95.4947	94.4609	DKB-IHW09075
DUCAF	ERS509525	ERX525935	ERR566946	29138591	13.5084	0.506865	99.0761	98.4448	DUCAF-IHW09019
E481324	ERS509526	ERX525936	ERR566947	45294760	14.0228	1.53309	96.3476	95.3154	E481324-IHW09011
EA	ERS509527	ERX525937	ERR566948	71507004	17.1474	4.58611	97.2981	96.8107	EA-IHW09081
EJ32B	ERS509528	ERX525938	ERR566949	51308538	13.3474	0.909769	99.0411	98.5038	EJ32B-IHW09085
EK	ERS509529	ERX525939	ERR566950	13007301	12.7434	0.191882	97.7323	95.7615	EK-IHW09054
FPAF	ERS509531	ERX525941	ERR566952	41743426	9.0698	2.43542	98.6634	98.1796	FPAF-IHW09105
HO104	ERS509532	ERX525942	ERR566953	26279546	14.1394	0.590975	96.601	95.6353	HO104-IHW09082
HOR	ERS509533	ERX525943	ERR566954	75217700	13.216	0.972548	98.4456	98.0793	HOR-IHW09053
IBW9	ERS509534	ERX525944	ERR566955	27077651	13.2762	0.541292	97.2109	95.5936	IBW9-IHW09049
ISH3	ERS509535	ERX525945	ERR566956	12382384	13.0386	0.304264	94.5652	92.0076	ISH3-IHW09369
JBUSH	ERS509536	ERX525946	ERR566957	25820557	13.306	0.55387	97.5436	95.3079	JBUSH-IHW09035
JESTHOM	ERS509537	ERX525947	ERR566958	20251767	13.7322	0.731399	96.4843	95.151	JESTHOM-IHW09004
JHAF	ERS509538	ERX525948	ERR566959	30004231	14.0698	0.566885	96.7373	95.899	JHAF-IHW09030
JO528239	ERS509539	ERX525949	ERR566960	15272794	13.8694	0.567278	97.9589	96.0227	JO528239-IHW09041
JVM	ERS509540	ERX525950	ERR566961	14287825	13.4708	0.556563	97.4645	95.0445	JVM-IHW09039
JY	ERS509541	ERX525951	ERR566962	9248506	12.1772	0.801688	95.3352	88.2189	JY-IHW09287
KAS011	ERS509542	ERX525952	ERR566963	17635433	12.5428	0.724978	95.5468	93.4009	KAS011-IHW09003
KAS116	ERS509543	ERX525953	ERR566964	18846053	12.1854	0.366747	94.9347	93.0493	KAS116-IHW09009
KAWASAKI	ERS509544	ERX525954	ERR566965	29045805	6.0628	2.77653	94.8959	93.4058	KAWASAKI-IHW09143
KGU	ERS509545	ERX525955	ERR566966	24852760	6.2048	3.29854	97.7255	96.1436	KGU-IHW09309
KOSE	ERS509546	ERX525956	ERR566967	37137409	13.334	0.416169	98.4279	97.8652	KOSE-IHW09056
KRC005	ERS509547	ERX525957	ERR566968	17409121	14.5646	0.607303	96.6507	94.9937	KRC005-IHW9360
L0541265	ERS509548	ERX525958	ERR566969	23271308	14.2214	0.545821	99.4698	98.7716	LO541265-IHW09086
L081785	ERS509549	ERX525959	ERR566970	24489072	13.935	0.363632	99.0005	98.183	LO081785-IHW09018
LBF	ERS509550	ERX525960	ERR566971	19607191	14.8192	0.586845	96.2307	94.6701	LBF-IHW09048
LD2B	ERS509551	ERX525961	ERR566972	26135525	12.7882	0.309049	96.5559	95.4034	LD2B-IHW09083
LKT3	ERS509552	ERX525962	ERR566973	20896184	14.6402	0.449162	95.3181	93.9923	LKT3-IHW09107
LUY	ERS509553	ERX525963	ERR566974	25332804	13.9394	0.452315	96.7678	95.8141	LUY-IHW09070
LWAGS	ERS509554	ERX525964	ERR566975	35708547	14.183	0.452906	97.0394	96.3774	LWAGS-IHW09079
LZL	ERS509555	ERX525965	ERR566976	24667497	13.1956	0.418969	98.6385	97.6711	LZL-IHW09099
MADURA	ERS509556	ERX525966	ERR566977	26724613	13.1098	0.285738	97.2109	96.3389	MADURA-IHW09069
MANIKA	ERS509557	ERX525967	ERR566978	46781477	14.3732	1.8123	96.6646	95.8569	MANIKA-IHW09106
MCF	ERS509558	ERX525968	ERR566979	147592221	10.6394	0.395077	97.2893	96.9672	MCF-IHW09091
MGAR	ERS509559	ERX525969	ERR566980	21046840	12.2216	0.463275	96.6614	95.126	MGAR-IHW09014
MOU	ERS509560	ERX525970	ERR566981	155678197	11.3852	0.358257	97.0109	96.5031	MOU-IHW09050
MT14B	ERS509561	ERX525971	ERR566982	20664897	13.4204	0.707392	96.1609	94.6968	MT14B-IHW09098
MZ0707	ERS509562	ERX525972	ERR566983	11166839	13.6798	0.268002	94.9656	92.5618	MZO70782-IHW09002
OMW	ERS509563	ERX525973	ERR566984	25432340	13.6182	0.269121	98.3497	97.4781	OMW-IHW09058
PF04015	ERS509564	ERX525974	ERR566985	54295676	14.5228	1.83695	99.755	99.54	PF04015-IHW09088
PF97387	ERS509565	ERX525975	ERR566986	28721058	13.955	0.397739	96.7533	95.9197	PF97387-IHW09027
PGF	ERS509566	ERX525976	ERR566987	176110124	11.2034	0.351212	97.2766	97.0488	PGF-IHW09318
PITOUT	ERS509567	ERX525977	ERR566988	24612671	13.9172	0.367182	96.7137	95.7101	PITOUT-IHW09051
PLH	ERS509568	ERX525978	ERR566989	20544928	14.1028	0.818778	96.3107	94.9001	PLH-IHW09047
QBL	ERS509569	ERX525979	ERR566990	160330035	10.731	0.323702	99.2765	99.109	QBL-IHW09020
RML	ERS509570	ERX525980	ERR566991	21389275	14.8508	0.572572	96.7222	95.3923	RML-IHW09016
RSH	ERS509571	ERX525981	ERR566992	27309893	13.8168	0.464713	98.5907	97.8005	RSH-IHW09021
SA1	ERS509595	ERX526005	ERR567016	22529962	14.6078	0.516259	95.5935	94.5521	SA-IHW09001
SCHU	ERS509572	ERX525982	ERR566993	28985323	13.5468	0.480449	96.8078	95.9611	SCHU-IHW09013
SLE005	ERS509573	ERX525983	ERR566994	17954394	13.0652	0.261238	98.2459	97.0269	SLE005-IHW09059
SP0010	ERS509574	ERX525984	ERR566995	23152017	12.589	0.536711	96.4812	94.9767	SP0010-IHW09036
SPL	ERS509575	ERX525985	ERR566996	10288121	13.6254	0.23901	95.9928	93.3928	SPL-IHW09101
SSTO	ERS509576	ERX525986	ERR566997	163599137	11.7076	0.225537	97.2897	97.0364	SSTO-IHW09302
STEINLIN	ERS509577	ERX525987	ERR566998	47852083	12.6912	1.39903	99.6681	99.3015	Steinlin-IHW09087
SWEIG	ERS509578	ERX525988	ERR566999	26197326	13.5428	0.515944	98.3705	97.5478	SWEIG-IHW09037
T7526	ERS509579	ERX525989	ERR567000	59795958	12.5028	0.924756	96.795	96.1907	T7526-IHW09076
TAB	ERS509581	ERX525991	ERR567002	20738787	13.7456	0.470837	96.5597	95.389	TAB-IHW09066
TEM	ERS509582	ERX525992	ERR567003	29739460	13.5956	0.457047	98.2739	97.6124	TEM-IHW09057
TISI	ERS509583	ERX525993	ERR567004	33193029	13.7198	0.475104	97.7125	97.1403	TISI-IHW09042
VAVY	ERS509584	ERX525994	ERR567005	29213829	14.0564	0.36702	99.53	99.0975	VAVY-IHW09023
WAR	ERS509585	ERX525995	ERR567006	26035471	13.62	0.539722	96.8299	95.7795	WAR
WDV	ERS509586	ERX525996	ERR567007	26805469	13.2576	0.275971	98.2642	97.4853	WDV-IHW09062
WIN197	ERS509587	ERX525997	ERR567008	34275228	13.7682	0.439299	97.0925	96.4571	WIN-IHW09095
WJR076D	ERS509588	ERX525998	ERR567009	29609972	14.3842	0.606351	96.35	95.4434	WJRO76-IHW09012
WT100BIS	ERS509589	ERX525999	ERR567010	23397085	12.7528	0.63861	96.383	94.783	WT100BIS-IHW09006
WT24	ERS509590	ERX526000	ERR567011	22524444	14.963	0.55977	96.2671	95.1141	WT24-IHW09015
WT47D	ERS509591	ERX526001	ERR567012	12078277	13.2212	0.288125	97.3992	95.092	WT47-IHW09063
WT49	ERS509592	ERX526002	ERR567013	30336897	13.5836	0.542587	99.1385	98.5527	WT49-IHW09285
WT51	ERS509593	ERX526003	ERR567014	20460784	13.9642	0.521071	95.2304	93.667	WT51-IHW09029
YAR	ERS509594	ERX526004	ERR567015	33182529	13.8478	0.350906	96.6724	95.9658	YAR-IHW09026

## Sheet: B_contigs
Cell line	Read Accession	Number of contigs	filtered contigs	N50	Join threshold	Homozygous entire MHC	Final Haplotype length (bp)	Final haplotype Scaffolds	Final haplotype gaps	SCAFFOLD ACC	ASSEMBLY NAME
31227ABO	ERS509497	2466	2347	4540	70	Y	4857471	98	167	CZSA02000001	31227ABO_ii
AKIBA	ERS509498	2467	2345	4293	68	Y	4813085	84	182	CZTI02000001	AKIBA_ii
AMA1	ERS509499	2725	2573	4232	67	Y	4868176	166	181	CZTF02000001	AMA1_ii
AMALA	ERS509500	3351	3210	3328	43	Y	4813545	263	261	CZSS02000001	AMALA_ii
APD	ERS509501	2462	2219	4199	150	Y	4952542	16	155	CZSY02000001	APD_ii
AWELLS	ERS509502	2415	2257	4514	79	n	3257802	22	83	CZSZ02000001	AWELLS_ii
AZH	ERS509503	2712	2566	3976	80	Y	4831723	143	215	CZRR02000001	AZH_ii
BEI	ERS509504	2413	2237	4533	79	Y	4875028	18	95	CZSD02000001	BEI_ii
BER	ERS509505	3588	3453	3370	77	n	3500196	148	176	CZRW02000001	BER_ii
BGE	ERS509506	2443	2293	2740	25	n	2022684	85	114	CZSE02000001	BGED_ii
BH	ERS509507	3752	3593	3142	63	n	2032793	45	95	CZST02000001	BH_ii
BM09	ERS509508	2521	2391	4150	75	Y	4772858	75	219	CZSM02000001	BM09_ii
BM14	ERS509509	2460	2317	4309	80	Y	4872350	102	219	CZTB02000001	BM14_ii
BM15	ERS509510	2385	2213	4515	80	Y	4864931	35	184	CZRT02000001	BM15_ii
BM16	ERS509511	2968	2788	4008	80	n	3833527	32	121	CZRZ02000001	BM16_ii
BM21	ERS509512	2612	2453	4319	80	Y	4820969	174	217	CZRQ02000001	BM21_ii
BOLETH	ERS509514	2851	2722	3897	65	Y	4853998	219	234	CZSX02000001	BOLETH_ii
BSM	ERS509515	2635	2471	4272	60	Y	4862603	99	171	CZSN02000001	BSM_ii
BTB	ERS509516	2758	2632	3870	57	Y	4780859	107	190	CZRV02000001	BTB_ii
CALEGORO	ERS509517	2878	2677	4100	69	Y	4852519	141	167	CZSL02000001	CALOGERO_ii
CB6B	ERS509518	2668	2546	4107	48	Y	4926117	84	154	CZTK02000001	CB6B_ii
Clint*	ERS509519											*chimpanzee
COX	ERS509520	2387	2042	4473	150	Y	4897273	16	265	FTQW01000001	COX_ii
DBB	ERS509521	2531	2248	4281	150	Y	4981159	18	157	CZSV02000001	DBB_ii
DEM	ERS509522	5186	4952	1217	80	n	1137294	47	56	CZTE02000001	DEMD_ii
DEU	ERS509523	2337	4952	4875	47	Y	5205442	303	148	CZTA02000001	DEU_ii
DKB	ERS509524	2510	2379	4267	75	Y	4832078	149	219	CZRY02000001	DKB_ii
DUCAF	ERS509525	2325	2223	4535	69	Y	4830856	21	144	CZSO02000001	DUCAF_ii
E481324	ERS509526	3319	3195	3509	46	n	4205578	77	137	CZRU02000001	E481324_ii
EA	ERS509527	2770	2645	4042	70	n	1808554	10	46	CZSH02000001	EA_ii
EJ32B	ERS509528	2657	2533	3939	56	Y	4916632	56	175	CZSU02000001	EJ32B_ii
EK	ERS509529	2544	2447	4445	40	Y	4823631	132	234	CZTD02000001	EK_ii
FPAF	ERS509531	2630	2245	4462	78	Y	4893184	26	160	CZSK02000001	FPAF_ii
HO104	ERS509532	2361	2266	4488	71	n	4657293	90	204	CZSG02000001	HO104_ii
HOR	ERS509533	2467	2289	4426	66	Y	4990057	39	114	CZSJ02000001	HOR_ii
IBW9	ERS509534	2606	2456	4241	72	Y	4855901	111	220	CZTH02000001	IBW9_ii
ISH3	ERS509535	2746	2631	4162	39	Y	4806034	146	232	CZRS02000001	ISH3_ii
JBUSH	ERS509536	3115	3013	4467	80	Y	4860231	100	77	CZSB02000001	JBUSH_ii
JESTHOM	ERS509537	3289	3107	3535	57	Y	4812160	122	175	CZRX02000001	JESTHOM_ii
JHAF	ERS509538	2474	2335	4439	80	Y	4868071	80	203	CZSQ02000001	JHAF_ii
JO528239	ERS509539	3600	3461	3204	45	n	4316112	206	172	CZSF02000001	JO528239_ii
JVM	ERS509540	3282	3157	3425	43	Y	4836681	246	222	CZSW02000001	JVM_ii
JY	ERS509541	6354	6202	1691	31	n	915035	178	129	CZTN02000001	JY_ii
KAS011	ERS509542	3610	3474	3168	49	n	4360697	205	180	CZSP02000001	KAS011_ii
KAS116	ERS509543	2956	2800	3844	80	Y	4721350	153	179	CZSR02000001	KAS116_ii
KAWASAKI	ERS509544	3710	3321	3181	58	Y	4803676	232	298	CZSC02000001	KAWASAKI_ii
KGU	ERS509545	3190	2801	3739	49	Y	4849328	189	192	CZTJ02000001	KGU_ii
KOSE	ERS509546	3834	3672	3311	80	n	3348259	35	100	CZTG02000001	KOSE_ii
KRC005	ERS509547	2854	2736	3865	44	Y	4748093	95	158	CZTC02000001	KRC005_ii
LBF	ERS509548	2872	2715	3880	54	n	4376050	67	143	CZSI02000001	LBF_ii
LD2B	ERS509549	4612	4492	2700	62	n	1495576	24	41	CZTM02000001	LD2B_ii
LKT3	ERS509550	2859	2709	3906	56	Y	4855504	133	175	CZTL02000001	LKT3_ii
LO081785	ERS509551	2538	2399	4379	80	Y	4862936	98	187	CZTP02000001	L081785_ii
LO541265	ERS509552	2645	2524	4140	63	Y	4855514	83	170	CZTO02000001	L0541265_ii
LUY	ERS509553	3479	3318	3316	80	n	2142634	39	66	CZTQ02000001	LUY_ii
LWAGS	ERS509554	3809	3641	3348	80	n	3081048	62	129	CZTU02000001	LWAGS_ii
LZL	ERS509555	2598	2484	4096	57	Y	4868426	38	139	CZTS02000001	LZL_ii
MADURA	ERS509556	2383	2276	4486	70	Y	4781178	64	156	CZTR02000001	MADURA_ii
MANIKA	ERS509557	4453	4272	2990	60	n	3006518	52	82	CZTV02000001	MANIKA_ii
MCF	ERS509558	2399	2142	4467	150	Y	4944877	13	199	CZTW02000001	MCF_ii
MGAR	ERS509559	2371	2128	4030	48	Y	4981100	22	202	CZTT02000001	MGAR_ii
MOU	ERS509560	2870	2726	4458	150	Y	4858148	128	182	CZTY02000001	MOU_ii
MT14B	ERS509561	3022	2867	3910	67	n	4016527	152	203	CZTX02000001	MT14B_ii
MZO70782	ERS509562	4143	4030	2841	49	n	1532492	103	92	CZUF02000001	MZ0707_ii
OMW	ERS509563	2458	2321	4458	68	Y	4890431	56	150	CZUD02000001	OMW_ii
PF04015	ERS509564	2951	2808	3855	63	n	4363867	16	109	CZUA02000001	PF04015_ii
PF97387	ERS509565	3719	3569	3260	80	n	1868084	31	68	CZUJ02000001	PF97387_ii
PGF	ERS509566	2483	2161	4323	150	n	3927590	32	225	CZUC02000001	PGF_ii
PITOUT	ERS509567	2426	2286	4470	71	Y	4846413	99	164	CZTZ02000001	PITOUT_ii
PLH	ERS509568	3584	3371	3234	79	n	2546555	104	146	CZUH02000001	PLH_ii
QBL	ERS509569	2284	2025	4516	150	Y	4907571	23	250	CZUB02000001	QBL_ii
RML	ERS509570	2766	2635	4040	63	Y	4870507	100	217	CZUG02000001	RML_ii
RSH	ERS509571	4437	4256	2916	80	n	1913030	40	86	CZUN02000001	RSH_ii
SA	ERS509595	3483	3339	3150	80	n	3248613	166	200	CZUE02000001	SA1_ii
SCHU	ERS509572	2597	2487	4243	80	n	4321044	56	171	CZUI02000001	SCHU_ii
SLE005	ERS509573	2618	2521	4133	59	n	4208675	70	182	CZUL02000001	SLE005_ii
SP0010	ERS509574	3329	3178	3667	63	Y	4897812	131	251	CZUO02000001	SP0010_ii
SPL	ERS509575	2739	2627	3964	80	Y	4747603	186	263	CZUM02000001	SPL_ii
SSTO	ERS509576	2156	1997	4573	150	Y	4947442	15	280	CZUK02000001	SSTO_ii
STEINLIN	ERS509577	3194	3063	3763	43	n	4212596	28	139	CZUQ02000001	STEINLIN_ii
SWEIG	ERS509578	3648	3502	3388	80	n	1680488	57	97	CZUP02000001	SWEIG_ii
T7526	ERS509579	3827	3649	3107	70	n	2195573	45	62	CZUU02000001	T7526_ii
TAB	ERS509581	3456	3340	3123	80	n	2096924	74	88	CZUR02000001	TAB_ii
TEM	ERS509582	2390	2251	4564	77	Y	4874488	51	170	CZUS02000001	TEM_ii
TISI	ERS509583	2427	2280	4480	80	Y	4830526	70	191	CZUT02000001	TISI_ii
VAVY	ERS509584	2301	2165	4537	80	Y	4816706	69	214	CZUV02000001	VAVY_ii
WAR	ERS509585	2569	2451	4251	72	Y	4898091	158	241	CZUW02000001	WAR_ii
WDV	ERS509586	2823	2669	4091	80	n	4400941	74	159	CZUX02000001	WDV_ii
WIN	ERS509587	5099	4919	2873	80	n	1970996	20	82	CZUY02000001	WIN197_ii
WJRO76	ERS509588	3054	2928	3978	80	n	3858120	75	171	CZUZ02000001	WJR076D_ii
WT100BIS	ERS509589	3196	3000	3698	66	Y	4799861	140	184	CZVA02000001	WT100BIS_ii
WT24	ERS509590	2659	2514	4176	69	Y	4868485	118	179	CZVC02000001	WT24_ii
WT47	ERS509591	2806	2693	3548	42	Y	4863472	141	227	CZVD02000001	WT47D_ii
WT49	ERS509592	2445	2286	4341	75	Y	4830911	80	185	CZVE02000001	WT49_ii
WT51	ERS509593	2814	2650	4106	61	Y	4805261	121	211	CZVF02000001	WT51_ii
YAR	ERS509594	2394	2212	4606	80	Y	4864458	87	176	CZVB02000001	YAR_ii
