# Supplementary material for: Sequences of 95 humanMHChaplotypes reveal extreme coding variation in genes other than highly polymorphicHLA class IandII
Source: HighWire-hosted journal article supplement (doi:10.1101/gr.213538.116), 2017-03-30
Supplement: Supplemental_Table_S2.xlsx [file Supplemental_Table_S2.xlsx]

## Sheet: A_Classical
IHWG cell line	HLA-A	HLA-A	HLA-B	HLA-B	HLA-C	HLA-C	HLA-DRB1	HLA-DRB1	HLA-DRB345	HLA-DRB345	HLA-DQA1	HLA-DQA1	HLA-DQB1	HLA-DQB1	HLA-DPA1	HLA-DPA1	HLA-DPB1	HLA-DPB1
31227ABO	A*02:01:01:01	A*02:01:01:01	B*18:01:01:02	B*18:01:01:02	C*07:01:01:01	C*07:01:01:01	DRB1*14:54:01	DRB1*14:54:01	DRB3*02:02:01:01	DRB3*02:02:01:01	DQA1*01:04:01:01	DQA1*01:04:01:01	DQB1*05:03:01:01	DQB1*05:03:01:01	DPA1*01:03:01:04	DPA1*01:03:01:04	DPB1*04:01:01:01	DPB1*04:01:01:01
AKIBA	A*24:02:01:01	A*24:02:01:01	B*52:01:01:01	B*52:01:01:01	C*12:02:02	C*12:02:02	DRB1*15:02:01	DRB1*15:02:01	DRB5*01:02	DRB5*01:02	DQA1*01:03:01:01	DQA1*01:03:01:01	DQB1*06:01:01	DQB1*06:01:01	DPA1*02:01:01	DPA1*02:01:01	DPB1*09:01:01	DPB1*09:01:01
AMAI	A*68:02:01:01	A*68:02:01:01	B*53:01:01	B*53:01:01	C*04:01:01:01	C*04:01:01:01	DRB1*15:03:01:02	DRB1*15:03:01:02	DRB5*01:01:01	DRB5*01:01:01	DQA1*01:02:01:02	DQA1*01:02:01:02	DQB1*06:02:01	DQB1*06:02:01	DPA1*03:01	DPA1*03:01	DPB1*105:01	DPB1*105:01
AMALA	A*02:17:02	A*02:17:02	B*15:01:01:01	B*15:01:01:01	C*03:03:01	C*03:03:01	DRB1*14:02:01	DRB1*14:02:01	DRB3*01:01:02:01	DRB3*01:01:02:01	DQA1*05:03	DQA1*05:03	DQB1*03:01:01:01	DQB1*03:01:01:01	DPA1*01:03:01:05	DPA1*01:03:01:05	DPB1*04:02:01:02	DPB1*04:02:01:02
APD	A*01:01:01:01	A*01:01:01:01	B*40:01:02	B*40:01:02	C*06:02:01:01	C*06:02:01:01	DRB1*13:01:01	DRB1*13:01:01	DRB3*02:02:01:01	DRB3*02:02:01:01	DQA1*01:03:01:02	DQA1*01:03:01:02	DQB1*06:03:01	DQB1*06:03:01	DPA1*01:03:01:02	DPA1*01:03:01:02	DPB1*04:02:01:01	DPB1*04:02:01:01
AWELLS	A*02:01:01:01	A*02:01:01:01	B*44:02:01:01	B*44:02:01:01	C*05:01:01:02	C*05:01:01:02	DRB1*04:01:01	DRB1*04:01:01	DRB4*01:03:01:01	DRB4*01:03:01:01	DQA1*03:03:01	DQA1*03:03:01	DQB1*03:01:01:01	DQB1*03:01:01:01	DPA1*01:03:01:04	DPA1*02:03	DPB1*04:01:01:01	DPB1*14:01
AZH	A*24:02:01:01	A*24:02:01:01	B*56:01:01	B*56:01:01	C*01:02:01	C*01:02:01	DRB1*16:01:01	DRB1*16:01:01	DRB5*02:02	DRB5*02:02	DQA1*01:02:02	DQA1*01:02:02	DQB1*05:02:01	DQB1*05:02:01	DPA1*01:03:01:03	DPA1*01:03:01:03	DPB1*03:01:01	DPB1*03:01:01
BEI	A*02:01:01:01	A*02:01:01:01	B*57:01:01	B*57:01:01	C*06:02:01:01	C*06:02:01:01	DRB1*07:01:01:01	DRB1*07:01:01:01	DRB4*01:03:01:01	DRB4*01:03:01:01	DQA1*02:01	DQA1*02:01	DQB1*03:03:02:01	DQB1*03:03:02:01	DPA1*01:03:01:02	DPA1*01:03:01:02	DPB1*04:01:01:01	DPB1*04:01:01:01
BER	A*02:01:01:01	A*02:01:01:01	B*13:02:01	B*13:02:01	C*06:02:01:01	C*06:02:01:01	DRB1*07:01:01:01	DRB1*07:01:01:01	DRB4*01:03:01:01	DRB4*01:03:01:01	DQA1*02:01	DQA1*02:01	DQB1*02:02:01	DQB1*02:02:01	DPA1*01:03:01:01	DPA1*01:03:01:04	DPB1*02:01:02	DPB1*04:01:01:01
BGE	A*01:01:01:01	A*02:01:01:01	B*52:01:01:01	B*52:01:01:01	C*12:02:02	C*12:02:02	DRB1*15:02:01	DRB1*15:02:01	DRB5*01:02	DRB5*01:02	DQA1*01:03:01:01	DQA1*01:03:01:01	DQB1*06:01:01	DQB1*06:01:01	DPA1*01:03:01:01	DPA1*01:03:01:04	DPB1*04:01:01:01	DPB1*04:01:01:01
BH	A*02:01:01:01	A*02:01:01:01	B*13:02:01	B*13:02:01	C*06:02:01:01	C*06:02:01:01	DRB1*07:01:01:01	DRB1*07:01:01:01	DRB4*01:03:01:01	DRB4*01:03:01:01	DQA1*02:01	DQA1*02:01	DQB1*02:02:01	DQB1*02:02:01	DPA1*01:03:01:02	DPA1*02:01:01	DPB1*04:01:01:01	DPB1*17:01
BM09	A*02:01:01:01	A*02:01:01:01	B*35:01:01:01	B*35:01:01:01	C*04:01:01:01	C*04:01:01:01	DRB1*08:01:01	DRB1*08:01:01			DQA1*04:01:01	DQA1*04:01:01	DQB1*04:02:01	DQB1*04:02:01	DPA1*01:03:01:01	DPA1*01:03:01:01	DPB1*02:01:04	DPB1*02:01:04
BM14	A*03:01:01:01	A*03:01:01:01	B*07:02:01	B*07:02:01	C*07:02:01:03	C*07:02:01:03	DRB1*04:01:01	DRB1*04:01:01	DRB4*01:03:01:01	DRB4*01:03:01:01	DQA1*03:01:01	DQA1*03:01:01	DQB1*03:02:01	DQB1*03:02:01	DPA1*01:03:01:04	DPA1*01:03:01:04	DPB1*04:01:01:01	DPB1*04:01:01:01
BM15	A*01:01:01:01	A*01:01:01:01	B*49:01:01	B*49:01:01	C*07:01:01:01	C*07:01:01:01	DRB1*11:02:01	DRB1*11:02:01	DRB3*02:02:01:01	DRB3*02:02:01:01	DQA1*05:05:01:01	DQA1*05:05:01:01	DQB1*03:19	DQB1*03:19	DPA1*01:03:01:02	DPA1*01:03:01:02	DPB1*104:01	DPB1*104:01
BM16	A*02:01:01:01	A*02:01:01:01	B*18:01:01:02	B*18:01:01:02	C*07:01:01:01	C*07:01:01:01	DRB1*12:01:01	DRB1*12:01:01	DRB3*02:02:01:01	DRB3*02:02:01:01	DQA1*05:05:01:03	DQA1*05:05:01:03	DQB1*03:01:01:01	DQB1*03:01:01:01	DPA1*01:03:01:01	DPA1*01:03:01:01	DPB1*02:01:02	DPB1*02:01:02
BM21	A*01:01:01:01	A*01:01:01:01	B*41:01:01	B*41:01:01	C*17:01:01:02	C*17:01:01:02	DRB1*11:01:01	DRB1*11:01:01	DRB3*02:02:01:01	DRB3*02:02:01:01	DQA1*05:05:01:01	DQA1*05:05:01:01	DQB1*03:01:01:02	DQB1*03:01:01:02	DPA1*02:01:01	DPA1*02:01:01	DPB1*10:01	DPB1*10:01
BOLETH	A*02:01:01:01	A*02:01:01:01	B*15:01:01:01	B*15:01:01:01	C*03:04:01:01	C*03:04:01:01	DRB1*04:01:01	DRB1*04:01:01	DRB4*01:03:01:01	DRB4*01:03:01:01	DQA1*03:01:01	DQA1*03:01:01	DQB1*03:02:01	DQB1*03:02:01	DPA1*01:03:01:01	DPA1*01:03:01:01	DPB1*04:01:01:01	DPB1*04:01:01:01
BSM	A*02:01:01:01	A*02:01:01:01	B*15:01:01:01	B*15:01:01:01	C*03:04:01:01	C*03:04:01:01	DRB1*04:01:01	DRB1*04:01:01	DRB4*01:03:01:01	DRB4*01:03:01:01	DQA1*03:01:01	DQA1*03:01:01	DQB1*03:02:01	DQB1*03:02:01	DPA1*01:03:01:01	DPA1*01:03:01:01	DPB1*02:01:02	DPB1*02:01:02
BTB	A*02:01:01:01	A*02:01:01:01	B*27:05:02	B*27:05:02	C*01:02:01	C*01:02:01	DRB1*08:01:01	DRB1*08:01:01			DQA1*04:01:01	DQA1*04:01:01	DQB1*04:02:01	DQB1*04:02:01	DPA1*01:03:01:02	DPA1*01:03:01:02	DPB1*04:01:01:01	DPB1*04:01:01:01
CALOGERO	A*02:01:01:01	A*02:01:01:01	B*40:02:01	B*40:02:01	C*02:02:02:01	C*02:02:02:01	DRB1*16:01:01	DRB1*16:01:01	DRB5*02:02	DRB5*02:02	DQA1*01:02:02	DQA1*01:02:02	DQB1*05:02:01	DQB1*05:02:01	DPA1*01:03:01:04	DPA1*01:03:01:04	DPB1*04:01:01:01	DPB1*04:01:01:01
CB6B	A*01:01:01:01	A*01:01:01:01	B*15:01:01:01	B*15:01:01:01	C*03:03:01	C*03:03:01	DRB1*13:01:01	DRB1*13:01:01	DRB3*02:02:01:01	DRB3*02:02:01:01	DQA1*01:03:01:02	DQA1*01:03:01:02	DQB1*06:03:01	DQB1*06:03:01	DPA1*02:02:01	DPA1*02:02:01	DPB1*19:01	DPB1*19:01
COX	A*01:01:01:01	A*01:01:01:01	B*08:01:01	B*08:01:01	C*07:01:01:01	C*07:01:01:01	DRB1*03:01:01:01	DRB1*03:01:01:01	DRB3*01:01:02:01	DRB3*01:01:02:01	DQA1*05:01:01:02	DQA1*05:01:01:02	DQB1*02:01:01	DQB1*02:01:01	DPA1*01:03:01:03	DPA1*01:03:01:03	DPB1*03:01:01	DPB1*03:01:01
DBB	A*02:01:01:01	A*02:01:01:01	B*57:01:01	B*57:01:01	C*06:02:01:01	C*06:02:01:01	DRB1*07:01:01:02	DRB1*07:01:01:02	DRB4*01:03:01:02N	DRB4*01:03:01:02N	DQA1*02:01	DQA1*02:01	DQB1*03:03:02:01	DQB1*03:03:02:01	DPA1*01:03:01:02	DPA1*01:03:01:02	DPB1*04:01:01:02	DPB1*04:01:01:02
DEM	A*02:01:01:01	A*02:01:01:01	B*57:01:01	B*57:01:01	C*06:02:01:01	C*06:02:01:01	DRB1*04:01:01	DRB1*16:02:01	DRB4*01:03:01:01	DRB5*02:05	DQA1*01:02:02	DQA1*03:01:01	DQB1*03:02:01	DQB1*05:02:01	DPA1*01:03:01:02	DPA1*01:03:01:03	DPB1*03:01:01	DPB1*04:01:01:01
DEU	A*31:01:02	A*31:01:02	B*35:01:01:01	B*35:01:01:01	C*04:01:01:01	C*04:01:01:01	DRB1*04:01:01	DRB1*04:01:01	DRB4*01:03:01:01	DRB4*01:03:01:01	DQA1*03:03:01	DQA1*03:03:01	DQB1*03:01:01:01	DQB1*03:01:01:01	DPA1*01:03:01:02	DPA1*01:03:01:02	DPB1*04:01:01:01	DPB1*04:01:01:01
DKB	A*24:02:01:01	A*24:02:01:01	B*40:01:02	B*40:01:02	C*03:04:01:01	C*03:04:01:01	DRB1*09:01:02	DRB1*09:01:02	DRB4*01:03:02	DRB4*01:03:02	DQA1*03:02	DQA1*03:02	DQB1*03:03:02:01	DQB1*03:03:02:01	DPA1*01:03:01:04	DPA1*01:03:01:04	DPB1*04:01:01:01	DPB1*04:01:01:01
DUCAF	A*30:02:01:01	A*30:02:01:01	B*18:01:01:01	B*18:01:01:01	C*05:01:01:01	C*05:01:01:01	DRB1*03:01:01:01	DRB1*03:01:01:01	DRB3*02:02:01:01	DRB3*02:02:01:01	DQA1*05:01:01:01	DQA1*05:01:01:01	DQB1*02:01:01	DQB1*02:01:01	DPA1*01:03:01:01	DPA1*01:03:01:01	DPB1*02:02	DPB1*02:02
E4181324	A*01:01:01:01	A*01:01:01:01	B*52:01:01:01	B*52:01:01:01	C*12:02:02	C*12:02:02	DRB1*15:02:01	DRB1*15:02:01	DRB5*01:02	DRB5*01:02	DQA1*01:03:01:01	DQA1*01:03:01:01	DQB1*06:01:01	DQB1*06:01:01	DPA1*01:03:01:01	DPA1*01:03:01:02	DPB1*02:01:02	DPB1*04:01:01:01
EA	A*03:01:01:01	A*03:01:01:01	B*07:02:01	B*07:02:01	C*07:02:01:03	C*07:02:01:03	DRB1*15:01:01:01	DRB1*15:01:01:01	DRB5*01:01:01	DRB5*01:01:01	DQA1*01:02:01:01	DQA1*01:02:01:01	DQB1*06:02:01	DQB1*06:02:01	DPA1*01:03:01:02	DPA1*01:03:01:02	DPB1*04:01:01:01	DPB1*04:01:01:01
EJ32B	A*30:02:01:01	A*30:02:01:01	B*18:01:01:01	B*18:01:01:01	C*05:01:01:01	C*05:01:01:01	DRB1*03:01:01:01	DRB1*03:01:01:01	DRB3*02:02:01:01	DRB3*02:02:01:01	DQA1*05:01:01:01	DQA1*05:01:01:01	DQB1*02:01:01	DQB1*02:01:01	DPA1*01:03:01:01	DPA1*01:03:01:01	DPB1*02:01:02	DPB1*02:01:02
EK	A*02:01:01:01	A*02:01:01:01	B*44:02:01:01	B*44:02:01:01	C*05:01:01:02	C*05:01:01:02	DRB1*14:54:01	DRB1*14:54:01	DRB3*02:02:01:01	DRB3*02:02:01:01	DQA1*01:04:01:01	DQA1*01:04:01:01	DQB1*05:03:01:01	DQB1*05:03:01:01	DPA1*01:03:01:05	DPA1*01:03:01:05	DPB1*04:02:01:02	DPB1*04:02:01:02
FPAF	A*01:01:01:01	A*01:01:01:01	B*35:02:01	B*35:02:01	C*04:01:01:01	C*04:01:01:01	DRB1*11:04:01	DRB1*11:04:01	DRB3*02:02:01:01	DRB3*02:02:01:01	DQA1*01:03:01:02	DQA1*01:03:01:02	DQB1*06:03:01	DQB1*06:03:01	DPA1*02:01:01	DPA1*02:01:01	DPB1*02:01:02	DPB1*02:01:02
HO104	A*03:01:01:01	A*03:01:01:01	B*07:02:01	B*07:02:01	C*07:02:01:03	C*07:02:01:03	DRB1*15:01:01:01	DRB1*15:01:01:01	DRB5*01:01:01	DRB5*01:01:01	DQA1*01:02:01:01	DQA1*01:02:01:01	DQB1*06:02:01	DQB1*06:02:01	DPA1*01:03:01:02	DPA1*01:03:01:02	DPB1*04:01:01:01	DPB1*04:01:01:01
HOR	A*33:03:01	A*33:03:01	B*44:03:01	B*44:03:01	C*14:03	C*14:03	DRB1*13:02:01	DRB1*13:02:01	DRB3*03:01:01	DRB3*03:01:01	DQA1*01:02:01:04	DQA1*01:02:01:04	DQB1*06:04:01	DQB1*06:04:01	DPA1*01:03:01:01	DPA1*01:03:01:01	DPB1*04:01:01:01	DPB1*04:01:01:01
IBW9	A*33:01:01	A*33:01:01	B*14:02:01	B*14:02:01	C*08:02:01:01	C*08:02:01:01	DRB1*07:01:01:01	DRB1*07:01:01:01	DRB4*01:01:01:01	DRB4*01:01:01:01	DQA1*02:01	DQA1*02:01	DQB1*02:02:01	DQB1*02:02:01	DPA1*02:01:01	DPA1*02:01:01	DPB1*01:01:02	DPB1*01:01:02
ISH3	A*24:02:01:01	A*24:02:01:01	B*15:26N	B*15:26N	C*04:01:01:01	C*04:01:01:01	DRB1*04:06:01	DRB1*04:06:01	DRB4*01:03:01:01	DRB4*01:03:01:01	DQA1*03:01:01	DQA1*03:01:01	DQB1*03:02:01	DQB1*03:02:01	DPA1*02:02:02	DPA1*02:02:02	DPB1*02:01:02	DPB1*02:01:02
JBUSH	A*32:01:01	A*32:01:01	B*38:01:01	B*38:01:01	C*12:03:01:01	C*12:03:01:01	DRB1*11:01:01	DRB1*11:01:01	DRB3*02:02:01:01	DRB3*02:02:01:01	DQA1*05:05:01:01	DQA1*05:05:01:01	DQB1*03:01:01:02	DQB1*03:01:01:02	DPA1*01:03:01:04	DPA1*01:03:01:04	DPB1*04:01:01:01	DPB1*04:01:01:01
JESTHOM	A*02:01:01:01	A*02:01:01:01	B*27:05:02	B*27:05:02	C*01:02:01	C*01:02:01	DRB1*01:01:01	DRB1*01:01:01			DQA1*01:01:01	DQA1*01:01:01	DQB1*05:01:01:02	DQB1*05:01:01:02	DPA1*01:03:01:02	DPA1*01:03:01:02	DPB1*04:01:01:01	DPB1*04:01:01:01
JHAF	A*31:01:02	A*31:01:02	B*51:01:01	B*51:01:01	C*15:02:01	C*15:02:01	DRB1*04:07:01	DRB1*04:07:01	DRB4*01:03:01:01	DRB4*01:03:01:01	DQA1*03:03:01	DQA1*03:03:01	DQB1*03:01:01:01	DQB1*03:01:01:01	DPA1*01:03:01:03	DPA1*01:03:01:03	DPB1*03:01:01	DPB1*03:01:01
J0528239	A*01:01:01:01	A*01:01:01:01	B*35:02:01	B*35:02:01	C*04:01:01:01	C*04:01:01:01	DRB1*11:04:01	DRB1*11:04:01	DRB3*02:02:01:01	DRB3*02:02:01:01	DQA1*05:05:01:01	DQA1*05:05:01:01	DQB1*03:01:01:02	DQB1*03:01:01:02	DPA1*01:03:01:02	DPA1*02:01:01	DPB1*04:02:01:02	DPB1*11:01:01
JVM	A*02:01:01:01	A*02:01:01:01	B*18:01:01:01	B*18:01:01:01	C*05:01:01:01	C*05:01:01:01	DRB1*11:02:01	DRB1*11:02:01	DRB3*02:02:01:01	DRB3*02:02:01:01	DQA1*05:05:01:01	DQA1*05:05:01:01	DQB1*03:01:01:02	DQB1*03:01:01:02	DPA1*01:03:01:01	DPA1*01:03:01:01	DPB1*02:01:02	DPB1*02:01:02
JY	A*02:01:01:01	A*02:01:01:01	B*07:02:01	B*07:02:01	C*07:02:01:03	C*07:02:01:03	DRB1*04:04:01	DRB1*13:01:01	DRB4*01:02	DRB3*01:01:02:01	DQA1*01:03:01:02	DQA1*03:01:01	DQB1*04:01:01	DQB1*06:03:01	DPA1*01:03:01:01	DPA1*01:03:01:02	DPB1*02:01:02	DPB1*04:01:01:01
KAS011	A*01:01:01:01	A*01:01:01:01	B*37:01:01	B*37:01:01	C*06:02:01:01	C*06:02:01:01	DRB1*16:01:01	DRB1*16:01:01	DRB5*02:02	DRB5*02:02	DQA1*01:02:02	DQA1*01:02:02	DQB1*05:02:01	DQB1*05:02:01	DPA1*01:03:01:02	DPA1*02:01:01	DPB1*04:01:01:01	DPB1*14:01
KAS116	A*24:02:01:01	A*24:02:01:01	B*51:01:01	B*51:01:01	C*12:03:01:01	C*12:03:01:01	DRB1*01:01:01	DRB1*01:01:01			DQA1*01:01:01	DQA1*01:01:01	DQB1*05:01:01:02	DQB1*05:01:01:02	DPA1*02:01:01	DPA1*02:01:01	DPB1*13:01:01	DPB1*13:01:01
KAWASAKI	A*24:02:01:01	A*24:02:01:01	B*52:01:01:01	B*52:01:01:01	C*12:02:02	C*12:02:02	DRB1*15:02:01	DRB1*15:02:01	DRB5*01:02	DRB5*01:02	DQA1*01:03:01:01	DQA1*01:03:01:01	DQB1*06:01:01	DQB1*06:01:01	DPA1*02:01:01	DPA1*02:01:01	DPB1*09:01:01	DPB1*09:01:01
KGU	A*11:01:01	A*11:01:01	B*35:03:01	B*35:03:01	C*04:01:01:01	C*04:01:01:01	DRB1*14:04	DRB1*14:04	DRB3*02:02:01:01	DRB3*02:02:01:01	DQA1*01:04:02	DQA1*01:04:02	DQB1*06:01:01	DQB1*06:01:01	DPA1*01:03:01:04	DPA1*01:03:01:04	DPB1*04:01:01:01	DPB1*04:01:01:01
KOSE	A*02:01:01:01	A*02:01:01:01	B*35:03:01	B*35:03:01	C*12:03:01:01	C*12:03:01:01	DRB1*13:02:01	DRB1*14:54:01	DRB3*02:02:01:01	DRB3*03:01:01	DQA1*01:02:01:04	DQA1*01:04:01:01	DQB1*05:03:01:01	DQB1*06:04:01	DPA1*01:03:01:01	DPA1*02:01:08	DPB1*02:01:02	DPB1*13:01:01
KRC005	A*02:12	A*02:12	B*51:01:01	B*51:01:01	C*01:02:01	C*01:02:01	DRB1*08:01:01	DRB1*08:01:01			DQA1*04:01:01	DQA1*04:01:01	DQB1*04:02:01	DQB1*04:02:01	DPA1*01:03:01:05	DPA1*01:03:01:05	DPB1*04:02:01:02	DPB1*04:02:01:02
LO541265	A*01:01:01:01	A*01:01:01:01	B*08:01:01	B*08:01:01	C*07:01:01:01	C*07:01:01:01	DRB1*03:01:01:01	DRB1*03:01:01:01	DRB3*01:01:02:01	DRB3*01:01:02:01	DQA1*05:01:01:02	DQA1*05:01:01:02	DQB1*02:01:01	DQB1*02:01:01	DPA1*01:03:01:02	DPA1*02:01:02	DPB1*01:01:01	DPB1*04:01:01:01
L081785	A*03:01:01:01	A*24:02:82	B*18:01:01:01	B*18:01:01:01	C*05:01:01:01	C*05:01:01:01	DRB1*03:01:01:01	DRB1*03:01:01:01	DRB3*02:02:01:01	DRB3*02:02:01:01	DQA1*05:01:01:01	DQA1*05:01:01:01	DQB1*02:01:01	DQB1*02:01:01	DPA1*01:03:01:03	DPA1*01:03:01:03	DPB1*03:01:01	DPB1*03:01:01
LBF	A*30:01:01	A*30:01:01	B*13:02:01	B*13:02:01	C*06:02:01:01	C*06:02:01:01	DRB1*07:01:01:01	DRB1*07:01:01:01	DRB4*01:03:01:01	DRB4*01:03:01:01	DQA1*02:01	DQA1*02:01	DQB1*02:02:01	DQB1*02:02:01	DPA1*02:01:01	DPA1*02:01:01	DPB1*17:01	DPB1*17:01
LD2B	A*03:01:01:01	A*03:01:01:01	B*07:02:01	B*07:02:01	C*07:02:01:03	C*07:02:01:03	DRB1*15:01:01:01	DRB1*15:01:01:01	DRB5*01:01:01	DRB5*01:01:01	DQA1*01:02:01:01	DQA1*01:02:01:01	DQB1*06:02:01	DQB1*06:02:01	DPA1*01:03:01:02	DPA1*01:03:01:02	DPB1*04:01:01:01	DPB1*04:01:01:01
LKT3	A*24:02:01:01	A*24:02:01:01	B*54:01:01	B*54:01:01	C*01:02:01	C*01:02:01	DRB1*04:05:01	DRB1*04:05:01	DRB4*01:03:01:01	DRB4*01:03:01:01	DQA1*03:03:01	DQA1*03:03:01	DQB1*04:01:01	DQB1*04:01:01	DPA1*02:02:02	DPA1*02:02:02	DPB1*05:01:01	DPB1*05:01:01
LUY	A*02:01:01:01	A*02:01:01:01	B*51:01:01	B*51:01:01	C*14:02:01	C*14:02:01	DRB1*08:03:02	DRB1*08:03:02			DQA1*06:01:01	DQA1*06:01:01	DQB1*03:01:01:02	DQB1*03:01:01:02	DPA1*01:03:01:02	DPA1*02:01:08	DPB1*01:01:01	DPB1*04:01:01:01
LWAGS	A*33:01:01	A*33:01:01	B*14:02:01	B*14:02:01	C*08:02:01:01	C*08:02:01:01	DRB1*01:02:01	DRB1*01:02:01			DQA1*01:01:02	DQA1*01:01:02	DQB1*05:01:01:01	DQB1*05:01:01:01	DPA1*01:03:01:02	DPA1*01:03:01:02	DPB1*04:01:01:01	DPB1*104:01
LZL	A*02:17:02	A*02:17:02	B*15:01:01:01	B*15:01:01:01	C*03:03:01	C*03:03:01	DRB1*14:02:01	DRB1*14:02:01	DRB3*01:01:02:01	DRB3*01:01:02:01	DQA1*05:03	DQA1*05:03	DQB1*03:01:01:01	DQB1*03:01:01:01	DPA1*01:03:01:02	DPA1*01:03:01:02	DPB1*04:02:01:02	DPB1*04:02:01:02
MADURA	A*02:01:01:01	A*02:01:01:01	B*40:01:02	B*40:01:02	C*03:04:01:01	C*03:04:01:01	DRB1*08:01:01	DRB1*08:01:01			DQA1*04:01:01	DQA1*04:01:01	DQB1*04:02:01	DQB1*04:02:01	DPA1*01:03:01:02	DPA1*01:03:01:02	DPB1*04:01:01:01	DPB1*04:01:01:01
MANIKA	A*03:01:01:01	A*03:01:01:01	B*50:01:01	B*50:01:01	C*06:02:01:02	C*06:02:01:02	DRB1*07:01:01:03	DRB1*07:01:01:03	DRB4*01:03:01:01	DRB4*01:03:01:01	DQA1*02:01	DQA1*02:01	DQB1*02:02:01	DQB1*03:03:02:01	DPA1*01:03:01:02	DPA1*02:01:01	DPB1*04:01:01:01	DPB1*13:01:01
MCF	A*02:01:01:01	A*02:01:01:01	B*15:01:01:01	B*15:01:01:01	C*03:04:01:01	C*03:04:01:01	DRB1*04:01:01	DRB1*04:01:01	DRB4*01:03:01:01	DRB4*01:03:01:01	DQA1*03:03:01	DQA1*03:03:01	DQB1*03:01:01:01	DQB1*03:01:01:01	DPA1*01:03:01:05	DPA1*01:03:01:05	DPB1*04:02:01:02	DPB1*04:02:01:02
MGAR	A*26:01:01	A*26:01:01	B*08:01:01	B*08:01:01	C*07:01:01:01	C*07:01:01:01	DRB1*15:01:01:01	DRB1*15:01:01:01	DRB5*01:01:01	DRB5*01:01:01	DQA1*01:02:01:01	DQA1*01:02:01:01	DQB1*06:02:01	DQB1*06:02:01	DPA1*01:03:01:04	DPA1*01:03:01:04	DPB1*04:01:01:01	DPB1*04:01:01:01
MOU	A*29:02:01:01	A*29:02:01:01	B*44:03:01	B*44:03:01	C*16:01:01	C*16:01:01	DRB1*07:01:01:01	DRB1*07:01:01:01	DRB4*01:01:01:01	DRB4*01:01:01:01	DQA1*02:01	DQA1*02:01	DQB1*02:02:01	DQB1*02:02:01	DPA1*01:03:01:01	DPA1*01:03:01:01	DPB1*02:01:02	DPB1*02:01:02
MT14B	A*31:01:02	A*31:01:02	B*40:01:02	B*40:01:02	C*03:04:01:01	C*03:04:01:01	DRB1*04:04:01	DRB1*04:04:01	DRB4*01:03:01:01	DRB4*01:03:01:01	DQA1*03:01:01	DQA1*03:01:01	DQB1*03:02:01	DQB1*03:02:01	DPA1*01:03:01:05	DPA1*01:03:01:05	DPB1*04:02:01:02	DPB1*04:02:01:02
MZ070782	A*24:02:01:01	A*24:02:01:01	B*14:02:01	B*14:02:01	C*02:02:02:01	C*08:02:01:01	DRB1*01:02:01	DRB1*01:02:01			DQA1*01:01:02	DQA1*01:01:02	DQB1*05:01:01:01	DQB1*05:01:01:01	DPA1*01:03:01:02	DPA1*01:03:01:02	DPB1*04:01:01:01	DPB1*04:01:01:01
OMW	A*02:01:01:01	A*02:01:01:01	B*45:01:01	B*45:01:01	C*16:01:01	C*16:01:01	DRB1*13:01:01	DRB1*13:01:01	DRB3*01:01:02:01	DRB3*01:01:02:01	DQA1*01:03:01:02	DQA1*01:03:01:02	DQB1*06:03:01	DQB1*06:03:01	DPA1*02:01:08	DPA1*02:01:08	DPB1*01:01:01	DPB1*01:01:01
PF04015	A*01:01:01:01	A*01:01:01:01	B*08:01:01	B*08:01:01	C*07:01:01:01	C*07:01:01:01	DRB1*03:01:01:01	DRB1*03:01:01:01	DRB3*01:01:02:01	DRB3*01:01:02:01	DQA1*05:01:01:02	DQA1*05:01:01:02	DQB1*02:01:01	DQB1*02:01:01	DPA1*01:03:01:02	DPA1*01:03:01:02	DPB1*04:01:01:01	DPB1*01:01:01
PF97387	A*29:02:01:01	A*29:02:01:01	B*44:03:01	B*44:03:01	C*16:01:01	C*16:01:01	DRB1*04:01:01	DRB1*04:01:01	DRB4*01:03:01:01	DRB4*01:03:01:01	DQA1*03:03:01	DQA1*03:03:01	DQB1*03:01:01:01	DQB1*03:01:01:01	DPA1*01:03:01:02	DPA1*01:03:01:04	DPB1*04:01:01:01	DPB1*04:02:01:02
PGF	A*03:01:01:01	A*03:01:01:01	B*07:02:01	B*07:02:01	C*07:02:01:03	C*07:02:01:03	DRB1*15:01:01:01	DRB1*15:01:01:01	DRB5*01:01:01	DRB5*01:01:01	DQA1*01:02:01:05	DQA1*01:02:01:05	DQB1*06:02:01	DQB1*06:02:01	DPA1*01:03:01:02	DPA1*01:03:01:02	DPB1*04:01:01:01	DPB1*04:01:01:01
PITOUT	A*29:02:01:01	A*29:02:01:01	B*44:03:01	B*44:03:01	C*16:01:01	C*16:01:01	DRB1*07:01:01:01	DRB1*07:01:01:01	DRB4*01:01:01:01	DRB4*01:01:01:01	DQA1*02:01	DQA1*02:01	DQB1*02:02:01	DQB1*02:02:01	DPA1*01:03:01:02	DPA1*01:03:01:02	DPB1*04:01:01:01	DPB1*04:01:01:01
PLH	A*03:01:01:01	A*03:01:01:01	B*47:01:01:01	B*47:01:01:01	C*06:02:01:01	C*06:02:01:01	DRB1*07:01:01:01	DRB1*07:01:01:01	DRB4*01:01:01:01	DRB4*01:01:01:01	DQA1*02:01	DQA1*02:01	DQB1*02:02:01	DQB1*02:02:01	DPA1*01:03:01:02	DPA1*01:03:01:02	DPB1*15:01:01	DPB1*15:01:01
QBL	A*26:01:01	A*26:01:01	B*18:01:01:01	B*18:01:01:01	C*05:01:01:01	C*05:01:01:01	DRB1*03:01:01:02	DRB1*03:01:01:02	DRB3*02:02:01:01	DRB3*02:02:01:01	DQA1*05:01:01:01	DQA1*05:01:01:01	DQB1*02:01:01	DQB1*02:01:01	DPA1*01:03:01:01	DPA1*01:03:01:01	DPB1*02:02	DPB1*02:02
RML	A*02:04	A*02:04	B*51:01:01	B*51:01:01	C*15:02:01	C*15:02:01	DRB1*16:02:01	DRB1*16:02:01	DRB5*02:02	DRB5*02:02	DQA1*05:05:01:03	DQA1*05:05:01:03	DQB1*03:01:01:01	DQB1*03:01:01:01	DPA1*01:03:01:05	DPA1*01:03:01:05	DPB1*04:02:01:02	DPB1*04:02:01:02
RSH	A*30:01	A*68:02:07	B*42:01:01	B*42:01:01	C*17:01:01:02	C*17:01:01:02	DRB1*03:02:01	DRB1*03:02:01	DRB3*01:01:02:01	DRB3*01:01:02:01	DQA1*04:01:01	DQA1*04:01:01	DQB1*04:02:01	DQB1*04:02:01	DPA1*02:02:02	DPA1*03:01	DPB1*01:01:01	DPB1*105:01
SA	A*24:02:01:01	A*24:02:01:01	B*07:02:01	B*07:02:01	C*07:02:01:03	C*07:02:01:03	DRB1*01:01:01	DRB1*01:01:01			DQA1*01:01:01	DQA1*01:01:01	DQB1*05:01:01:02	DQB1*05:01:01:02	DPA1*01:03:01:05	DPA1*01:03:01:05	DPB1*04:02:01:02	DPB1*04:02:01:02
SCHU	A*03:01:01:01	A*03:01:01:01	B*07:02:01	B*07:02:01	C*07:02:01:03	C*07:02:01:03	DRB1*15:01:01:01	DRB1*15:01:01:01	DRB5*01:01:01	DRB5*01:01:01	DQA1*01:02:01:01	DQA1*01:02:01:01	DQB1*06:02:01	DQB1*06:02:01	DPA1*01:03:01:05	DPA1*01:03:01:05	DPB1*04:02:01:01	DPB1*04:02:01:02
SLE005	A*02:01:01:01	A*02:01:01:01	B*40:01:02	B*40:01:02	C*03:04:01:01	C*03:04:01:01	DRB1*13:02:01	DRB1*13:02:01	DRB3*03:01:01	DRB3*03:01:01	DQA1*01:02:01:04	DQA1*01:02:01:04	DQB1*06:04:01	DQB1*06:04:01	DPA1*01:03:01:03	DPA1*01:03:01:03	DPB1*03:01:01	DPB1*03:01:01
SP0010	A*02:01:01:01	A*02:01:01:01	B*44:02:01:01	B*44:02:01:01	C*05:01:01:02	C*05:01:01:02	DRB1*11:01:01	DRB1*11:01:01	DRB3*02:02:01:01	DRB3*02:02:01:01	DQA1*01:02:02	DQA1*01:02:02	DQB1*05:02:01	DQB1*05:02:01	DPA1*01:03:01:01	DPA1*01:03:01:01	DPB1*02:01:02	DPB1*02:01:02
SPL	A*31:01:02	A*31:01:02	B*15:01:01:01	B*15:01:01:01	C*01:02:30	C*01:02:30	DRB1*08	DRB1*08			DQA1*04:01:01	DQA1*04:01:01	DQB1*04:02:01	DQB1*04:02:01	DPA1*01:03:01:05	DPA1*01:03:01:05	DPB1*04:02:01:02	DPB1*04:02:01:02
SSTO	A*32:01:01	A*32:01:01	B*44:02:01:01	B*44:02:01:01	C*05:01:01:02	C*05:01:01:02	DRB1*04:03:01	DRB1*04:03:01	DRB4*01:03:01:03	DRB4*01:03:01:03	DQA1*03:01:01	DQA1*03:01:01	DQB1*03:05:01	DQB1*03:05:01	DPA1*01:03:01:04	DPA1*01:03:01:04	DPB1*04:01:01:01	DPB1*04:01:01:01
STEINLIN	A*01:01:01:01	A*01:01:01:01	B*08:01:01	B*08:01:01	C*07:01:01:01	C*07:01:01:01	DRB1*03:01:01:01	DRB1*03:01:01:01	DRB3*01:01:02:01	DRB3*01:01:02:01	DQA1*05:01:01:02	DQA1*05:01:01:02	DQB1*02:01:01	DQB1*02:01:01	DPA1*01:03:01:02	DPA1*01:03:01:03	DPB1*03:01:01	DPB1*04:01:01:01
SWEIG	A*29:02:01:01	A*29:02:01:01	B*40:02:01	B*40:02:01	C*02:02:02:01	C*02:02:02:01	DRB1*11:01:01	DRB1*11:01:01	DRB3*02:02:01:01	DRB3*02:02:01:01	DQA1*05:05:01:01	DQA1*05:05:01:01	DQB1*03:01:01:02	DQB1*03:01:01:02	DPA1*01:03:01:05	DPA1*01:03:01:05	DPB1*04:02:01:01	DPB1*04:02:01:02
T7526	A*02:06:01	A*02:07:01	B*46:01:01	B*46:01:01	C*01:02:01	C*08:01:01	DRB1*09:01:02	DRB1*09:01:02	DRB4*01:03:01:01	DRB4*01:03:01:01	DQA1*03:02	DQA1*03:02	DQB1*03:03:02:01	DQB1*03:03:02:01	DPA1*04:01	DPA1*04:01	DPB1*107:01	DPB1*107:01
TAB	A*02:01:01:01	A*02:07:01	B*46:01:01	B*46:01:01	C*01:02:01	C*01:02:01	DRB1*08:03:02	DRB1*08:03:02			DQA1*01:03:01:01	DQA1*01:03:01:01	DQB1*06:01:01	DQB1*06:01:01	DPA1*02:02:02	DPA1*02:02:02	DPB1*02:02	DPB1*02:02
TEM	A*66:01:01	A*66:01:01	B*38:01:01	B*38:01:01	C*12:03:01:01	C*12:03:01:01	DRB1*14:01:01	DRB1*14:01:01	DRB3*02:24	DRB3*02:24	DQA1*01:04:01:01	DQA1*01:04:01:01	DQB1*05:03:01:01	DQB1*05:03:01:01	DPA1*01:03:01:01	DPA1*01:03:01:01	DPB1*04:01:01:01	DPB1*04:01:01:01
TISI	A*24:02:01:01	A*24:02:01:01	B*35:08:01	B*35:08:01	C*04:01:01:01	C*04:01:01:01	DRB1*11:03	DRB1*11:03	DRB3*02:02:01:01	DRB3*02:02:01:01	DQA1*05:05:01:01	DQA1*05:05:01:01	DQB1*03:01:01:02	DQB1*03:01:01:02	DPA1*01:03:01:05	DPA1*01:03:01:05	DPB1*04:02:01:02	DPB1*04:02:01:02
VAVY	A*01:01:01:01	A*01:01:01:01	B*08:01:01	B*08:01:01	C*07:01:01:01	C*07:01:01:01	DRB1*03:01:01:01	DRB1*03:01:01:01	DRB3*01:01:02:01	DRB3*01:01:02:01	DQA1*05:01:01:02	DQA1*05:01:01:02	DQB1*02:01:01	DQB1*02:01:01	DPA1*02:01:08	DPA1*02:01:08	DPB1*01:01:01	DPB1*01:01:01
WAR	A*02:04	A*02:04	B*51:01:01	B*51:01:01	C*15:02:01	C*15:02:01	DRB1*16:02:01	DRB1*16:02:01	DRB5*02:02	DRB5*02:02	DQA1*05:05:01:03	DQA1*05:05:01:03	DQB1*03:01:01:01	DQB1*03:01:01:01	DPA1*01:03:01:05	DPA1*01:03:01:05	DPB1*04:02:01:02	DPB1*04:02:01:02
WDV	A*02:01:01:01	A*02:01:01:01	B*38:01:01	B*38:01:01	C*12:03:01:01	C*12:03:01:01	DRB1*13:01:01	DRB1*13:01:01	DRB3*01:01:02:01	DRB3*01:01:02:01	DQA1*01:03:01:02	DQA1*01:03:01:02	DQB1*06:03:01	DQB1*06:03:01	DPA1*01:03:01:01	DPA1*01:03:01:02	DPB1*02:01:02	DPB1*04:01:01:01
WIN	A*01:01:01:01	A*01:01:01:01	B*57:01:01	B*57:01:01	C*06:02:01:01	C*06:02:01:01	DRB1*07:01:01:01	DRB1*07:01:01:01	DRB4*01:03:01:01	DRB4*03:01N	DQA1*02:01	DQA1*02:01	DQB1*02:02:01	DQB1*03:03:02:01	DPA1*01:03:01:02	DPA1*02:01	DPB1*04:01:01:01	DPB1*13:01:01
WJR076	A*02:01:01:01	A*02:01:01:01	B*57:01:01	B*57:01:01	C*07:01:01:01	C*07:01:01:01	DRB1*16:02:01	DRB1*16:02:01	DRB5*02:02	DRB5*02:02	DQA1*01:02:02	DQA1*01:02:02	DQB1*05:02:01	DQB1*05:02:01	DPA1*01:03:01:01	DPA1*01:03:01:01	DPB1*02:01:02	DPB1*02:01:02
WT100BIS	A*11:01:01	A*11:01:01	B*35:01:01:02	B*35:01:01:02	C*04:01:01:01	C*04:01:01:01	DRB1*01:01:01	DRB1*01:01:01			DQA1*01:01:01	DQA1*01:01:01	DQB1*05:01:01:02	DQB1*05:01:01:02	DPA1*02:01:08	DPA1*02:01:08	DPB1*01:01:01	DPB1*01:01:01
WT24	A*02:01:01:01	A*02:01:01:01	B*27:05:02	B*27:05:02	C*02:02:02:01	C*02:02:02:01	DRB1*16:01:01	DRB1*16:01:01	DRB5*02:02	DRB5*02:02	DQA1*01:02:02	DQA1*01:02:02	DQB1*05:02:01	DQB1*05:02:01	DPA1*01:03:01:03	DPA1*01:03:01:03	DPB1*03:01:01	DPB1*03:01:01
WT47	A*32:01:01	A*32:01:01	B*44:02:01:01	B*44:02:01:01	C*05:01:01:02	C*05:01:01:02	DRB1*13:02:01	DRB1*13:02:01	DRB3*03:01:01	DRB3*03:01:01	DQA1*01:02:01:04	DQA1*01:02:01:04	DQB1*06:04:01	DQB1*06:04:01	DPA1*01:03:01:01	DPA1*01:03:01:01	DPB1*16:01:01	DPB1*16:01:01
WT49	A*02:05:01	A*02:05:01	B*58:01:01	B*58:01:01	C*07:18	C*07:18	DRB1*03:01:01:01	DRB1*03:01:01:01	DRB3*02:02:01:01	DRB3*02:02:01:01	DQA1*05:01:01:01	DQA1*05:01:01:01	DQB1*02:01:01	DQB1*02:01:01	DPA1*01:03:01:02	DPA1*01:03:01:02	DPB1*04:01:01:01	DPB1*04:01:01:01
WT51	A*23:01:01	A*23:01:01	B*14:01:01	B*14:01:01	C*08:02:01:01	C*08:02:01:01	DRB1*04:01:01	DRB1*04:01:01	DRB4*01:03:01:01	DRB4*01:03:01:01	DQA1*03:01:01	DQA1*03:01:01	DQB1*03:02:01	DQB1*03:02:01	DPA1*01:03:01:01	DPA1*01:03:01:01	DPB1*02:01:02	DPB1*02:01:02
YAR	A*26:01:01	A*26:01:01	B*38:01:01	B*38:01:01	C*12:03:01:01	C*12:03:01:01	DRB1*04:02:01	DRB1*04:02:01	DRB4*01:03:01:01	DRB4*01:03:01:01	DQA1*03:01:01	DQA1*03:01:01	DQB1*03:02:01	DQB1*03:02:01	DPA1*01:03:01:04	DPA1*01:03:01:04	DPB1*04:01:01:01	DPB1*04:01:01:01

## Sheet: B_other_IPD
HLA	HLA-F	GenBank ID	HLA-G	GenBank ID	HLA-E	GenBank ID	MICA	GenBank ID	MICB	GenBank ID	HLA-DRA	GenBank ID	HLA-DOB	GenBank ID	TAP2	GenBank ID	TAP1	GenBank ID	HLA-DMB	GenBank ID	HLA-DMA	GenBank ID	HLA-DOA	GenBank ID
huref	F*01:03:01:01		G*01:01:01		E*01:03:02		MICA*008:04		MICB*004:01:01		DRA*01:02:03		DOB*01:01:01		TAP2*01:01:03		TAP1*01:01:01:05		DMB*01:03:01		DMA*01:01:01		DOA*01:01:02
31227ABO	F*01:01:01:08		G*01:01:01		E*01:03:02		MICA*018:01		MICB*002:01	KY500941	DRA*01:02:02	KY497338	DOB*01:01:01		TAP2*01:01:03		TAP1*01:01:01:01		DMB*01:02	KY497273	DMA*01:01:01		DOA*01:01:02
AKIBA	F*01:01:02:01	KY497360	G*01:04:01		E*01:03:01		MICA*009:01		MICB*005:03		DRA*01:02:02	KY497339	DOB*01:02:02	KY497330	TAP2*01:01:03	KY497397	TAP1*01:01:01:02		DMB*01:01:01		DMA*01:01:01		DOA*01:01:02	KY497300
AMA1	F*01:01:01:01	KY497361	G*01:01:02		E*01:03:02		MICA*002:01		MICB*006		DRA*01:01:02		DOB*01:01:01		TAP2*01:04	KY497398	TAP1*01:01:01:05	KY497375	DMB*01:02	KY497274	DMA*01:01:01		DOA*01:01:02	KY497301
AMALA	F*01:01:01:01		G*01:01:01		E*01:03:02		MICA*010:01		MICB*002:01:01		DRA*01:02:02		DOB*01:01:03	KY497331	TAP2*01:01:01		TAP1*01:01:01:03		DMB*01:01:01		DMA*01:02		DOA*01:01:02
APD	F*01:01:01:09		G*01:06		E*01:01:01		MICA*008:04	KY500931	MICB*004:01:02		DRA*01:01:01	KY497340	DOB*01:01:01		TAP2*02:01:02		TAP1*01:01:01:01		DMB*01:01:01		DMA*01:01:01		DOA*01:01:02
AWELLS	F*01:01:01:01		G*01:01:01		E*01:01:01		MICA*008:01:02		MICB*005:02:04		DRA*01:01:01	KY497340	DOB*01:01:01		TAP2*01:01:03		TAP1*01:01:01:01		DMB*01:03:01		DMA*01:01:01		het
AZH	F*01:01:01:08		G*01:04:01		E*01:03:01		MICA*012:01		MICB*005:02:01		DRA*01:01:01	KY497341	DOB*01:04:01	KY497332	TAP2*01:01:03		TAP1*02:01:01	KY497376	DMB*01:01:01		DMA*01:01:01		DOA*01:01:01
BEI	F*01:01:01:08		G*01:01:01		E*01:01:01		MICA*017	KY500932	MICB*003		DRA*01:01:02		DOB*01:05		TAP2*02:01:02		TAP1*01:01:01:03		DMB*01:01:01		DMA*01:02		DOA*01:01:01
BER	F*01:01:01:08		G*01:01:01		het		MICA*008:01:02		MICB*005:02:02		DRA*01:01:03		DOB*01:01:01	KY497333	TAP2*02:01:02	KY497399	TAP1*01:01:01:05		DMB*01:01:01	KY497275	DMA*01:01:01		het
BGED	het		het		het		MICA*009:01		MICB*005:03		DRA*01:02:02	KY497340	het		het		het		het		het		het
BH	het		het		het		MICA*008:01:02		MICB*005:02:01		DRA*01:01:03		DOB*01:01:01		TAP2*02:01:02		TAP1*01:01:01:05		DMB*01:01:01	KY497276	DMA*01:02		DOA*01:01:02
BM09	F*01:01:01:01		G*01:01:01		E*01:01:01	KY497359	MICA*002:01		MICB*005:02:04		DRA*01:02:02	KY497342	DOB*01:01:01		TAP2*01:04		TAP1*05:01	KY497370	DMB*01:01:01		DMA*01:01:01		DOA*01:02	KY497302
BM14	F*01:03:01		G*01:01:01		E*01:03:02		MICA*008:04		MICB*004:01:01		DRA*01:01:03		DOB*01:01:01		TAP2*01:01:03		TAP1*01:01:01:01		DMB*01:03:01		DMA*01:01:01		DOA*01:01:04	KY497303
BM15	F*01:01:01:09		G*01:06		E*01:01:01		MICA*004		MICB*005:02:01		DRA*01:01:01	KY497343	DOB*01:02:01		TAP2*01:01:03	KY497400	TAP1*01:01:01:01		DMB*01:03:01	KY497277	DMA*01:01:01	KY497260	DOA*01:01:02	KY497304
BM16	F*01:01:02:01	KY497362	G*01:01:01		E*01:03:02		MICA*018:01		MICB*002:01	KY500942	DRA*01:02:02	KY497344	DOB*01:04:01		TAP2*01:01:03	KY497401	TAP1*02:01:01	KY497377	DMB*01:03:01		DMA*01:01:01		DOA*01:01:02	KY497305
BM21	F*01:01:01:09		G*01:06		E*01:01:01		MICA*004		MICB*005:02		DRA*01:01:01	KY497340	DOB*01:01:03		TAP2*01:01:03		TAP1*01:01:01:05	KY497372	DMB*01:01:01	KY497278	DMA*01:04	KY497261	DOA*01:01:04
BOLETH	F*01:01:01:08		G*01:01:01		E*01:01:01		MICA*010:01		MICB*002:01:01		DRA*01:01:03		DOB*01:02:01		TAP2*01:01:03		TAP1*01:01:01:03		DMB*01:01:01		DMA*01:01:01		DOA*01:01:01
BSM	F*01:01:01:01		G*01:01:01		E*01:03:02		MICA*010:01		MICB*002:01:01		DRA*01:01:03		DOB*01:02:01		TAP2*01:01:03		TAP1*01:01:01:03		DMB*01:03:01		DMA*01:01:01	KY497262	DOA*01:01:02
BTB	F*01:01:01:01		G*01:01:01		E*01:03:02		MICA*007:01		MICB*005:02		DRA*01:02:02	KY497345	DOB*01:01:01		TAP2*01:01:03	KY497402	TAP1*01:01:01:03		DMB*01:01:01		DMA*01:01:01		DOA*01:01:02	KY497306
CALOGERO	F*01:01:01:08		G*01:01:01		E*01:01:01		MICA*027		MICB*005:02:01		DRA*01:01:01	KY497346	DOB*01:04:01		TAP2*01:01:03		TAP1*02:01:01	KY497378	DMB*01:01:01		DMA*01:01:01		DOA*01:01:01
CB6B	F*01:01:01:09		G*01:06		E*01:01:01		MICA*010:01		MICB*005:02:01		DRA*01:01:03		DOB*01:01:01		TAP2*02:01:02		TAP1*01:01:01:01		DMB*01:01:01		DMA*01:01:01		DOA*01:02
COX	F*01:01:01:09		G*01:01:02		E*01:01:01		MICA*008:01:01		MICB*008		DRA*01:02:02		DOB*01:01:03		TAP2*01:01:02	KY497403	TAP1*01:01:01:02		DMB*01:03:01		DMA*01:01:01		DOA*01:01:05	KY497307
DBB	F*01:01:01:08		G*01:01:01		E*01:01:01		MICA*017		MICB*003		DRA*01:01:02		DOB*01:05		TAP2*02:01:02		TAP1*01:01:01:03		DMB*01:01:01		DMA*01:02		DOA*01:01:01
DEMD	het		het		het		MICA*017		MICB*003		het		het		het		het		het		het		het
DEU	F*01:01:01:11	KY497363	G*01:03:01		E*01:03:02		MICA*017	KY500933	MICB*005:02:02		DRA*01:01:03		DOB*01:01:03		TAP2*01:01:03		TAP1*01:01:01:05		DMB*01:01:01	KY497279	DMA*01:02		DOA*01:01:01
DKB	F*01:01:01:05		G*01:01:02		E*01:01:01		MICA*008:04	KY500934	MICB*002:01:01		DRA*01:01:01	KY497341	DOB*01:01:01		TAP2*01:01:03		TAP1*02:01:01	KY497379	DMB*01:01:01	KY497280	DMA*01:01:01		DOA*01:01:01
DUCAF	F*01:01:01:01		G*01:01:01		E*01:03:02		MICA*001		MICB*005:02:01		DRA*01:01:01		DOB*01:03	KY497334	TAP2*01:01:03		TAP1*01:01:01:04		DMB*01:01:01	KY497281	DMA*01:01:01		DOA*01:01:02
E481324	F*01:01:01:09		G*01:06		E*01:01:01		MICA*009:01		MICB*005:03		DRA*01:02:02	KY497339	DOB*01:01:01	KY497335	het		het		het		het		het
EA	het		het		het		het		het		DRA*01:02:03		DOB*01:01:01		TAP2*01:01:03		TAP1*01:01:01:05		DMB*01:03:01		DMA*01:01:01		DOA*01:01:02	KY497308
EJ32B	F*01:01:01:01		G*01:01:01		E*01:03:02		MICA*001		MICB*005:02:01		DRA*01:01:01		DOB*01:03		TAP2*01:01:03		het		het		het		het
EK	F*01:01:01:01		G*01:01:01		E*01:01:01		MICA*008:01:02		MICB*005:02:04		DRA*01:02:02		DOB*01:01:01		TAP2*02:01:02		TAP1*01:01:01:01		DMB*01:01:01		DMA*01:01:01		DOA*01:01:02	KY497309
FPAF	F*01:01:01:09		G*01:06		E*01:01:01		MICA*016		MICB*005:01		DRA*01:01:01	KY497341	DOB*01:01:01		TAP2*01:04		TAP1*03:01	KY497380	DMB*01:01:01	KY497282	DMA*01:01:01		DOA*01:01:01
HO104	F*01:03:01:01		G*01:01:01		E*01:03:02		MICA*008:04		MICB*004:01:01		DRA*01:02:03		DOB*01:01:01		TAP2*01:01:03		TAP1*01:01:01:05		DMB*01:03:01		DMA*01:01:01		DOA*01:01:02
HOR	F*01:01:02:04	KY497360	G*01:04:01		E*01:03:01		MICA*004		MICB*005:02:04		DRA*01:02:02	KY497347	DOB*01:01:01		TAP2*01:01:03	KY497404	TAP1*01:01:01:01		DMB*01:01:01	KY497283	DMA*01:01:01		DOA*01:01:02	KY497310
IBW9	F*01:01:02:02	KY497364	G*01:03:01		E*01:01:01		MICA*011		MICB*005:02		DRA*01:01:02		DOB*01:01:01		TAP2*01:01:03		TAP1*04:01	KY497381	DMB*01:03:01	KY497284	DMA*01:01:01		DOA*01:01:04	KY497311
ISH3	F*01:01:01:09		G*01:04:01		E*01:01:01		MICA*010:01		MICB*005:02:01		DRA*01:01:03		DOB*01:01:01		TAP2*01:01:03	KY497405	TAP1*01:01:01:05		DMB*01:02		DMA*01:01:01	KY497263	DOA*01:01:01
JBUSH	F*01:01:02:04		G*01:01:12	KY497369	E*01:01:01		MICA*002:01		MICB*002:01	KY500943	DRA*01:01:01	KY497340	DOB*01:01:03		TAP2*01:01:03		TAP1*01:01:01:01		DMB*01:01:01		DMA*01:01:01		DOA*01:01:01
JESTHOM	F*01:01:01:01		G*01:01:01		E*01:01:01		MICA*007:01		MICB*005:02		DRA*01:01:01	KY497348	DOB*01:01:01		TAP2*02:01:01		TAP1*02:01:01	KY497382	DMB*01:03:01		DMA*01:01:01		DOA*01:01:02
JHAF	F*01:01:01:11		G*01:03:01		E*01:03:01		MICA*009:01		MICB*002:01:01		DRA*01:01:03		DOB*01:01:03		TAP2*01:01:03		TAP1*01:01:01:02		DMB*01:01:01	KY497285	DMA*01:01:01		DOA*01:01:04
JO528239	F*01:01:01:09		G*01:06		E*01:01:01		MICA*016		MICB*005:01		DRA*01:01:01	KY497341	DOB*01:01:01		TAP2*01:01:03		TAP1*01:01:01:01		DMB*01:01:01	KY497286	DMA*01:01:01		het
JVM	F*01:01:01:01		G*01:01:01		E*01:03:02		MICA*001		MICB*005:02:01		DRA*01:01:01	KY497340	DOB*01:01:01		TAP2*01:01:03	KY497406	TAP1*01:01:01:02		DMB*01:01:01		DMA*01:01:01		DOA*01:01:01	KY497312
JY	het		het		het		MICA*008:04		MICB*004:01:01		het		het		het		het		het		het		het
KAS011	F*01:01:01:09		G*01:06		E*01:01:01		MICA*010:01		MICB*002:01:01		DRA*01:01:01	KY497341	DOB*01:04:01		TAP2*01:02		TAP1*01:01:01:02		DMB*01:03:01	KY497287	DMA*01:01:01		DOA*01:01:02	KY497313
KAS116	F*01:01:01:01		G*01:01:02		E*01:03:02		MICA*006		MICB*005:02		DRA*01:01:01	KY497348	DOB*01:02:01		TAP2*01:01:03	KY497407	TAP1*01:01:01:03		DMB*01:02		DMA*01:01:01		DOA*01:01:05
KAWASAKI	F*01:01:01:07		G*01:04:01		E*01:03:01		MICA*009:01		MICB*005:03		DRA*01:02:02	KY497339	DOB*01:02:02		TAP2*01:01:03		TAP1*01:01:01:02		DMB*01:01:01		DMA*01:01:01		DOA*01:01:02
KGU	F*01:01:02:01	KY497365	G*01:01:03		E*01:01:01		MICA*002:01		MICB*005:02:01		DRA*01:01:01		DOB*01:02:02		TAP2*01:01:03	KY497408	TAP1*01:01:01:01		DMB*01:02		DMA*01:01:01		DOA*01:01:02	KY497314
KOSE	F*01:01:01:01		G*01:01:01		E*01:01:01		MICA*002:01		MICB*005:02:01		het		het		het		het		het		het		het
KRC005	F*01:01:01:01		G*01:01:01		E*01:01:01		MICA*010:01		MICB*005:02:01		DRA*01:02:02	KY497345	DOB*01:01:03		TAP2*01:01:03		TAP1*01:01:01:03		DMB*01:03:01		DMA*01:01:01		DOA*01:01:02	KY497315
L0541265	F*01:01:01:09		G*01:01:02		E*01:01:01		MICA*008:01:01		MICB*008		DRA*01:02:02		DOB*01:01:03		TAP2*01:01:03		TAP1*01:01:01:01	KY497383	DMB*01:01:01	KY497288	DMA*01:01:01		DOA*01:01:02	KY497316
L081785	het		het		het		MICA*001		MICB*005:02:01		DRA*01:01:01		het		het		het		het		het		het
LBF	F*01:01:01:09		G*01:05N		E*01:01:01		MICA*008:01	KY500935	MICB*005:02:01		DRA*01:01:03		DOB*01:01:01		TAP2*02:01:02		TAP1*01:01:01:05		DMB*01:01:01		DMA*01:02		DOA*01:01:02
LD2B	F*01:03:01:01		G*01:01:01		E*01:03:02		MICA*008:04		MICB*004:01:01		DRA*01:02:03		DOB*01:01:01		TAP2*01:01:03	KY497409	TAP1*01:01:01:05		DMB*01:03:01		DMA*01:01:01		DOA*01:01:02
LKT3	F*01:01:01:09		G*01:04:01		E*01:01:01		MICA*012:01		MICB*005:02:01		DRA*01:01:01	KY497349	DOB*01:01:01	KY497336	TAP2*02:01:02	KY497410	TAP1*01:01:01:05		DMB*01:01:01		DMA*01:02		DOA*01:01:02
LUY	het		het		het		MICA*049	KY500936	MICB*005:02:01		DRA*01:02:02	KY497350	DOB*01:01:01		TAP2*02:01:01		TAP1*01:01:01:01	KY497384	DMB*01:01:01		DMA*01:01:01		DOA*01:01:02	KY497317
LWAGS	F*01:01:02:03	KY497364	G*01:03:01		E*01:01:01		MICA*011		MICB*005:02	KY500951	DRA*01:01:01	KY497351	het		het		het		het		het		het
LZL	F*01:01:01:01		G*01:01:01		E*01:03:02		MICA*010:01		MICB*002:01:01		DRA*01:02:02	KY497347	DOB*01:01:03		TAP2*01:01:03		TAP1*01:01:01:01		DMB*01:01:01		DMA*01:02		DOA*01:01:02
MADURA	F*01:01:01:01		G*01:01:01		E*01:03:02		MICA*008:04	KY500937	MICB*002:01:01		DRA*01:02:02	KY497345	DOB*01:01:01		TAP2*01:04		TAP1*05:01	KY497370	DMB*01:07	KY497289	DMA*01:03	KY497264	DOA*01:01:01
MANIKA	F*01:03:01		G*01:01:01		E*01:01:01		MICA*009:02		MICB*005:06	KY500947	het		het		het		het		het		het		het
MCF	F*01:01:01:01		G*01:01:01		E*01:03:02		MICA*010:01		MICB*002:01	KY500948	DRA*01:01:03		DOB*01:01:01		TAP2*01:04		TAP1*01:01:01:01		DMB*01:03:01		DMA*01:01:01		DOA*01:01:02
MGAR	F*01:01:01:08		G*01:01:02		E*01:03:02		MICA*008:04	KY500938	MICB*004:01:02		DRA*01:02:03		DOB*01:04:01		TAP2*01:01:03	KY497411	TAP1*01:01:01:01		DMB*01:01:01		DMA*01:01:01		DOA*01:01:02
MOU	F*01:01:01:08		G*01:01:01		E*01:03:02		MICA*004		MICB*005:02:02		DRA*01:01:02		DOB*01:03		TAP2*01:01:03		TAP1*01:01:01:04		DMB*01:01:01		DMA*01:01:01		DOA*01:01:01
MT14B	F*01:01:01:11		G*01:03:01		E*01:03:02		MICA*008:04		MICB*004:01:01		DRA*01:01:03		DOB*01:01:01		het		het		het		het		het
MZ0707	het		het		het		het		het		DRA*01:01:01	KY497346	DOB*01:01:01		TAP2*02:01:02	KY497412	TAP1*04:01	KY497385	DMB*01:01:01	KY497290	DMA*01:02		DOA*01:01:02
OMW	F*01:01:01:01		G*01:01:01		E*01:03:02		MICA*015		MICB*002:01	KY500949	DRA*01:02:02	KY497353	DOB*01:01:01	KY497337	TAP2*01:01:03		TAP1*04:01	KY497386	DMB*01:01:01	KY497291	DMA*01:01:01	KY497265	DOA*01:01:04	KY497318
PF04015	F*01:01:01:09		G*01:01:02		E*01:01:01		MICA*008:01:01		MICB*008		DRA*01:02:02		DOB*01:01:03		TAP2*01:01:03	KY497413	TAP1*01:01:01:01	KY497387	DMB*01:01:01	KY497292	DMA*01:01:01	KY497266	DOA*01:01:02	KY497319
PF97387	F*01:01:01:08		G*01:01:01		E*01:03:02		het		het		het		het		het		het		het		het		het
PGF	F*01:03:01		G*01:01:01		E*01:03:02		MICA*008:04		MICB*004:01:01		DRA*01:02:03		DOB*01:01:01		TAP2*01:01:03		TAP1*01:01:01:05		DMB*01:03:01		DMA*01:01:01		DOA*01:01:02
PITOUT	F*01:01:01:08		G*01:01:01		E*01:03:02		MICA*004		MICB*005:02:02		DRA*01:01:02		DOB*01:01:01		TAP2*01:01:03	KY497414	TAP1*01:01:01:04		DMB*01:01:01		DMA*01:01:01		DOA*01:01:01
PLH	het		het		het		MICA*008:01:01		MICB*004:01:01		DRA*01:01:01	KY497354	DOB*01:03		TAP2*01:01:03	KY497415	TAP1*03:01	KY497388	DMB*01:01:01		DMA*01:01:01		DOA*01:01:02
QBL	F*01:01:01:08		G*01:01:02		E*01:01:01		MICA*001		MICB*005:02:01		DRA*01:01:01		DOB*01:03		TAP2*01:01:03		TAP1*01:01:01:04		DMB*01:01:01		DMA*01:01:01		DOA*01:01:02
RML	F*01:01:01:09	KY497366	G*01:01:01		E*01:01:01		MICA*009:01		MICB*005		DRA*01:01:01		DOB*01:01:01		TAP2*02:01:02	KY497416	TAP1*01:01:01:03	KY497373	DMB*01:01:01		DMA*01:01:01		DOA*01:01:02
RSH	het		het		het		MICA*004		MICB*002:01:01		DRA*01:02:02	KY497350	DOB*01:01:01		TAP2*01:01:03	KY497417	TAP1*01:01:01:04	KY497371	DMB*01:01:01	KY497293	DMA*01:01:01	KY497267	DOA*01:01:05	KY497320
SA	F*01:01:01:09		G*01:04:01		het		MICA*008:04		MICB*004:01:02		DRA*01:01:01	KY497348	DOB*01:01:01		TAP2*02:01:01		TAP1*01:01:01:02		DMB*01:01:01		DMA*01:01:01		DOA*01:01:02
SCHU	F*01:03:01:01		G*01:01:01		E*01:03:02		MICA*008:04	KY500939	MICB*004:01:01		DRA*01:02:03		DOB*01:01:01		TAP2*01:01:03		TAP1*01:01:01:05		DMB*01:03:01	KY497294	DMA*01:01:01	KY497268	DOA*01:01:02	KY497321
SLE005	F*01:04	KY497367	G*01:01:01		E*01:03:02		MICA*008:04		MICB*014		DRA*01:02:02	KY497347	DOB*01:01:01		TAP2*01:03	KY497418	TAP1*02:01:01	KY497389	DMB*01:01:01		DMA*01:01:01	KY497269	DOA*01:01:04	KY497322
SP0010	F*01:01:01:01		G*01:01:01		E*01:01:01		MICA*008:01:02		MICB*005:02:01		DRA*01:01:03		DOB*01:04:01		TAP2*01:04	KY497419	TAP1*01:01:01:01		DMB*01:01:01		DMA*01:01:01		DOA*01:01:04
SPL	F*01:01:01:11		G*01:03:01		E*01:01:01		MICA*010:01		MICB*006		DRA*01:02:02	KY497345	DOB*01:01:01		TAP2*02:01:02	KY497420	TAP1*02:01:01	KY497390	DMB*01:03:01		DMA*01:01:01		DOA*01:01:02
SSTO	F*01:01:02:06		G*01:01:12		E*01:01:01		MICA*008:01:02		MICB*005:02:03		DRA*01:01:03		DOB*01:01:01		TAP2*02:01:02	KY497421	TAP1*06:01		DMB*01:03:01		DMA*01:01:01		DOA*01:01:04
STEINLIN	F*01:01:01:09		G*01:01:02		E*01:01:01		MICA*008:01:01		MICB*008		DRA*01:02:02		DOB*01:01:01		het		het		het		het		het
SWEIG	het		het		het		MICA*027		MICB*013		DRA*01:01:01	KY497340	het		het		het		het		het		het
T7526	het		het		het		het		MICB*005:02:01		DRA*01:01:01	KY497356	DOB*01:01:01		TAP2*01:01:03		TAP1*01:01:01:01		DMB*01:03:01		DMA*01:01:01		DOA*01:01:02
TAB	het		het		het		MICA*010:01		MICB*005:02:01		DRA*01:02:02	KY497350	DOB*01:01:01		TAP2*02:01:02	KY497422	TAP1*01:01:01:03		DMB*01:01:01	KY497295	DMA*01:02		DOA*01:01:04	KY497323
TEM	F*01:01:01:08		G*01:01:02		E*01:03:01		MICA*002:01		MICB*002:01	KY500944	DRA*01:01:01		DOB*01:01:01		TAP2*01:01:03	KY497423	TAP1*01:01:01:01	KY497391	DMB*01:01:01	KY497296	DMA*01:01:01:01	KY497270	DOA*01:01:02
TISI	F*01:01:01:05		G*01:01:02		E*01:01:01		MICA*016		MICB*002:01	KY500950	DRA*01:01:01	KY497340	DOB*01:01:03		TAP2*01:01:03	KY497424	TAP1*01:01:01:02		DMB*01:01:01	KY497297	DMA*01:01:01		DOA*01:01:02
VAVY	F*01:01:01:09		G*01:01:02		E*01:01:01		MICA*008:01:01		MICB*008		DRA*01:02:02		DOB*01:01:03		TAP2*01:01:03		TAP1*01:01:01:01	KY497392	DMB*01:01:01	KY497298	DMA*01:01:01		DOA*01:01:02	KY497324
WAR	F*01:01:01:09	KY497366	G*01:01:01		E*01:01:01		MICA*009:01		MICB*005:02:01		DRA*01:01:01		DOB*01:01:01		TAP2*02:01:02		TAP1*01:01:01:03	KY497374	DMB*01:01:01		DMA*01:01:01		DOA*01:01:02
WDV	F*01:01:01:01		G*01:01:01		E*01:03:02		MICA*002:01	KY500940	MICB*002:01	KY500945	DRA*01:02:02	KY497347	DOB*01:01:03		TAP2*01:01:03		TAP1*01:01:01:02		DMB*01:01:01		DMA*01:01:01		DOA*01:01:02	KY497325
WIN197	F*01:01:01:09		G*01:06		E*01:01:01		MICA*017		MICB*003		het		het		het		het		het		het		DOA*01:01:02	KY497326
WJR076	F*01:01:01:01		G*01:01:01		E*01:01:01		MICA*017		MICB*003		DRA*01:01:01	KY497341	DOB*01:01:01		TAP2*01:01:03	KY497425	TAP1*03:01	KY497393	DMB*01:01:01		DMA*01:01:01		DOA*01:01:02
WT100BIS	F*01:01:02	KY497365	G*01:01:03		E*01:01:01		MICA*002:01		MICB*002:01:01		DRA*01:01:01	KY497348	DOB*01:01:01		TAP2*02:01:01	KY497426	TAP1*01:01:01:01	KY497394	DMB*01:01:01		DMA*01:01:01		DOA*01:01:02
WT24	F*01:01:01:01		G*01:01:01		E*01:01:01		MICA*007:01		MICB*005:02		DRA*01:01:01	KY497341	DOB*01:01:03		TAP2*01:01:03	KY497427	TAP1*01:01:01:01		DMB*01:01:01		DMA*01:01:01		DOA*01:01:02
WT47	F*01:01:02:04		G*01:01:12	KY497369	E*01:01:01	KY497358	MICA*008:01:02		MICB*005:02:01		DRA*01:02:02		DOB*01:01:01		TAP2*01:01:03		TAP1*02:01:01	KY497395	DMB*01:01:01		DMA*01:01:01		DOA*01:01:03	KY497327
WT49	F*01:01:02:03		G*01:03:01		E*01:03:01		MICA*002:01		MICB*008		DRA*01:01:01		DOB*01:01:01		TAP2*02:01:02		TAP1*01:01:01:01		DMB*01:01:01		DMA*01:01:01	KY497271	DOA*01:01:05	KY497328
WT51	F*01:03:01:01		G*01:04:04		E*01:01:01		MICA*019		MICB*005:02:04		DRA*01:01:03		DOB*01:01:01		TAP2*01:01:03		TAP1*03:01	KY497396	DMB*01:01:01		DMA*01:01:01		DOA*01:01:02
YAR	F*01:01:01:08	KY497368	G*01:01:02		E*01:03:01		MICA*002:01		MICB*002:01	KY500946	DRA*01:01:03	KY497357	DOB*01:01:01		TAP2*01:01:03	KY497428	TAP1*01:01:01:05		DMB*01:02	KY497299	DMA*01:01:01	KY497272	DOA*01:01:02	KY497329

## Sheet: C_new
			Cell name	GenBank	Allele name	closest allele	coding change
		HLA-DPA1	CB6B	KP774801		DPA1*02:02:01	122 V-M
			OMW	KP774799	DPA1*02:01:08	DPA1*02:01:01	158 P-L

## Sheet: D_mir148a
IHWG cell line	HLA-C	HLA-C	mir148a				allele	probe sequences
31227ABO	C*07:01:01:01	C*07:01:01:01	C7	C7			C1	CTGTCTCAACTTCATGGTGCGCTGAGCTGCAA
AKIBA	C*12:02:02	C*12:02:02	C2	C2			C2	CTGTCTCAACTTTACGTGTACTGAGCTGCAA
AMA1	C*04:01:01:01	C*04:01:01:01	C1	C1			C7	CTGTCTCAAATTCATGGTGCACTGAGCTGCAA
AMALA	C*03:03:01	C*03:03:01	C1	C1
APD	C*06:02:01:01	C*06:02:01:01	C2	C2
AWELLS	C*05:01:01:02	C*05:01:01:02	C2	C2
AZH	C*01:02:01	C*01:02:01	C1	C1
BEI	C*06:02:01:01	C*06:02:01:01	C2	C2
BER	C*06:02:01:01	C*06:02:01:01	C2	C2
BGED	C*12:02:02	C*12:02:02	C2	C2
BH	C*06:02:01:01	C*06:02:01:01	C2	C2
BM09	C*04:01:01:01	C*04:01:01:01	C1	C1
BM14	C*07:02:01:03	C*07:02:01:03	C7	C7
BM15	C*07:01:01:01	C*07:01:01:01	C7	C7
BM16	C*07:01:01:01	C*07:01:01:01	C7	C7
BM21	C*17:01:01:02	C*17:01:01:02	C7	C7
BOLETH	C*03:04:01:01	C*03:04:01:01	C1	C1
BSM	C*03:04:01:01	C*03:04:01:01	C1	C1
BTB	C*01:02:01	C*01:02:01	C1	C1
CALOGERO	C*02:02:02:01	C*02:02:02:01	C2	C2
CB6B	C*03:03:01	C*03:03:01	C1	C1
COX	C*07:01:01:01	C*07:01:01:01	C7	C7
DBB	C*06:02:01:01	C*06:02:01:01	C2	C2
DEMD	C*06:02:01:01	C*06:02:01:01	C2	C2
DEU	C*04:01:01:01	C*04:01:01:01	C1	C1
DKB	C*03:04:01:01	C*03:04:01:01	C1	C1
DUCAF	C*05:01:01:01	C*05:01:01:01	C2	C2
E481324	C*12:02:02	C*12:02:02	C2	C2
EA	C*07:02:01:03	C*07:02:01:03	C7	C7
EJ32B	C*05:01:01:01	C*05:01:01:01	C2	C2
EK	C*05:01:01:02	C*05:01:01:02	C2	C2
EN1	C*04:01:01:01	C*07:01:01:01	C1	C7
FPAF	C*04:01:01:01	C*04:01:01:01	C1	C1
HO104	C*07:02:01:03	C*07:02:01:03	C7	C7
HOR	C*14:03	C*14:03	C1	C1
IBW9	C*08:02:01:01	C*08:02:01:01	C2	C2
ISH3	C*04:01:01:01	C*04:01:01:01	C1	C1
JBUSH	C*12:03:01:01	C*12:03:01:01	C2	C2
JESTHOM	C*01:02:01	C*01:02:01	C1	C1
JHAF	C*15:02:01	C*15:02:01	C2	C2
JO528239	C*04:01:01:01	C*04:01:01:01	C1	C1
JVM	C*05:01:01:01	C*05:01:01:01	C2	C2
JY	C*07:02:01:03	C*07:02:01:03	C7	C7
KAS011	C*06:02:01:01	C*06:02:01:01	C2	C2
KAS116	C*12:03:01:01	C*12:03:01:01	C2	C2
KAWASAKI	C*12:02:02	C*12:02:02	C2	C2
KGU	C*04:01:01:01	C*04:01:01:01	C1	C1
KOSE	C*12:03:01:01	C*12:03:01:01	C2	C2
KRC005	C*01:02:01	C*01:02:01	C1	C1
L0541265	C*07:01:01:01	C*07:01:01:01	C7	C7
L081785	C*05:01:01:01	C*05:01:01:01	C2	C2
LBF	C*06:02:01:01	C*06:02:01:01	C2	C2
LD2B	C*07:02:01:03	C*07:02:01:03	C7	C7
LKT3	C*01:02:01	C*01:02:01	C1	C1
LUY	C*14:02:01	C*14:02:01	C1	C1
LWAGS	C*08:02:01:01	C*08:02:01:01	C2	C2
LZL	C*03:03:01	C*03:03:01	C1	C1
MADURA	C*03:04:01:01	C*03:04:01:01	C1	C1
MANIKA	C*06:02:01:01	C*06:02:01:01	C2	C2
MCF	C*03:04:01:01	C*03:04:01:01	C1	C1
MGAR	C*07:01:01:01	C*07:01:01:01	C7	C7
MOU	C*16:01:01	C*16:01:01	C2	C2
MT14B	C*03:04:01:01	C*03:04:01:01	C1	C1
MZ0707	C*02:02:02:01	C*08:02:01:01	C2	C2
OMW	C*16:01:01	C*16:01:01	C2	C2
PF04015	C*07:01:01:01	C*07:01:01:01	C7	C7
PF97387	C*16:01:01	C*16:01:01	C2	C2
PGF	C*07:02:01:03	C*07:02:01:03	C7	C7
PITOUT	C*16:01:01	C*16:01:01	C2	C2
PLH	C*06:02:01:01	C*06:02:01:01	C2	C2
QBL	C*05:01:01:01	C*05:01:01:01	C2	C2
RML	C*15:02:01	C*15:02:01	C2	C2
RSH	C*17:01:01:02	C*17:01:01:02	C7	C7
SA1	C*07:02:01:03	C*07:02:01:03	C7	C7
SCHU	C*07:02:01:03	C*07:02:01:03	C7	C7
SLE005	C*03:04:01:01	C*03:04:01:01	C1	C1
SP0010	C*05:01:01:02	C*05:01:01:02	C2	C2
SPL	C*01:02:30	C*01:02:30	C1	C1
SSTO	C*05:01:01:02	C*05:01:01:02	C2	C2
STEINLIN	C*07:01:01:01	C*07:01:01:01	C7	C7
SWEIG	C*02:02:02:01	C*02:02:02:01	C2	C2
T7526	C*01:02:01	C*08:01:01	C1	C2
T7527	C*01:02:01	C*01:02:01	C1	C1
TAB	C*01:02:01	C*01:02:01	C1	C1
TEM	C*12:03:01:01	C*12:03:01:01	C2	C2
TISI	C*04:01:01:01	C*04:01:01:01	C1	C1
VAVY	C*07:01:01:01	C*07:01:01:01	C7	C7
WAR	C*15:02:01	C*15:02:01	C2	C2
WDV	C*12:03:01:01	C*12:03:01:01	C2	C2
WIN197	C*06:02:01:01	C*06:02:01:01	C2	C2
WJR076D	C*07:01:01:01	C*07:01:01:01	C7	C7
WT100BIS	C*04:01:01:01	C*04:01:01:01	C1	C1
WT24	C*02:02:02:01	C*02:02:02:01	C2	C2
WT47D	C*05:01:01:02	C*05:01:01:02	C2	C2
WT49	C*07:18	C*07:18	C7	C7
WT51	C*08:02:01:01	C*08:02:01:01	C2	C2
YAR	C*12:03:01:01	C*12:03:01:01	C2	C2
