# Supplementary material for: Sequences of 95 humanMHChaplotypes reveal extreme coding variation in genes other than highly polymorphicHLA class IandII
Source: HighWire-hosted journal article supplement (doi:10.1101/gr.213538.116), 2017-03-30
Supplement: Supplemental_Table_S3.xlsx [file Supplemental_Table_S3.xlsx]

## Sheet: A_CDS
	Gene symbol	Reference Sequence	exons	strand	CDS Start (hg19)	CDS End	CDS Start (hg38)	CDS End	Other names			OMIM	Full name
1	GPX5	NM_001509	5	+	28493790	28501944	28526013	28534167				603435	Glutathione peroxidase 5 (epididymal)
2	ZBED9	NM_052923	4	-	28539687	28554494	28571910	28586717	SCAND3	BUSTER4	KIAA1925	615254	SCAN domain-containing protein 3
3	TRIM27	NM_006510	8	-	28871846	28891409	28904069	28923632	RFP			602165	Tripartite motif-containing 27
4	ZNF311	NM_001010877	7	-	28962777	28971731	28995000	29003954					Zinc Finger Protein 311
5	OR2W1	NM_030903	1	-	29011989	29012952	29044212	29045175					Olfactory Receptor
6	LOC100129636	NM_001195202	6	+	29031773	29044301	29063996	29076524
7	OR2B3	NM_001005226	1	-	29054083	29055025	29086306	29087248					Olfactory Receptor
8	OR2J3	NM_001005216	1	+	29079667	29080603	29111890	29112826	C3HEXS			615016	Olfactory receptor, family 2, subfamily J, member 3
9	OR2J2	NM_030905	1	+	29141412	29142351	29173635	29174574					Olfactory Receptor
10	OR14J1	NM_030946	1	+	29274466	29275432	29306689	29307655					Olfactory Receptor
11	OR5V1	NM_030876	1	-	29323006	29323972	29355229	29356195					Olfactory Receptor
12	OR12D3	NM_030959	1	-	29342113	29343064	29374336	29375287					Olfactory Receptor
13	OR12D2	NM_013936	1	+	29364476	29365400	29396699	29397623					Olfactory Receptor
14	OR11A1	NM_013937	1	-	29394470	29395418	29426693	29427641					Olfactory Receptor
15	OR10C1	NM_013941	1	+	29407792	29408731	29440015	29440954					Olfactory Receptor, Family 10, Subfamily C, Member 1
16	OR2H1	NM_030883	3	+	29429546	29430497	29461769	29462720					Olfactory Receptor
17	MAS1L	NM_052967	1	-	29454542	29455679	29486765	29487902	MRG			607235	MAS1 oncogene-like
18	UBD	NM_006398	2	-	29523656	29527478	29555879	29559701	FAT10			606050	Ubiquitin D
19	OR2H2	NM_007160	1	+	29555721	29556660	29587944	29588883					Olfactory Receptor
20	GABBR1	NM_001470	23	-	29571319	29600162	29603542	29632385				603540	Gamma-aminobutyric acid type B receptor subunit 1
21	MOG	NM_001008228	8	+	29624986	29638962	29657209	29671185	NRCLP7			159465	Myelin-oligodendrocyte glycoprotein
22	ZFP57	NM_001109809	4	-	29640276	29644780	29672499	29677003	TNDM1			612192	Zinc finger protein 57, mouse, homolog of
23	HLA-F	NM_001098479	7	+	29691240	29694952	29723463	29727175	HLA-CDA12	HLAF		143110	Human leukocyte Antigen, class I, F
24	LOC554223	NM_001207043	3	+	29759784	29764971	29792007	29797194
25	HLA-G	NM_002127	8	+	29795621	29798159	29827844	29830382				142871	Human leukocyte Antigen, class I, G
26	HLA-A	NM_001242758	8	+	29910330	29913232	29942553	29945455				142800	Human leukocyte Antigen, class I, A
27	ZNRD1	NM_001278785	5	+	30029301	30032474	30061524	30064697	TCTEX6	HTEX6		607525	Zinc ribbon domain-containing protein 1
28	PPP1R11	NM_021959	3	+	30035187	30037083	30067410	30069306	TCTEX5			606670	Protein phosphatase 1, regulatory subunit 11
29	RNF39	NM_170769	5	-	30038887	30043566	30071110	30075789	HZFW	HZF	LIRF	607524	Ring finger protein 39
30	TRIM31	NM_007028	9	-	30071312	30080582	30103535	30112805	HCGI			609316	Tripartite motif-containing protein 31
31	TRIM40	NM_001286633	6	+	30104813	30115589	30137036	30147812					Tripartite motif-containing 40
32	TRIM10	NM_052828	8	-	30121464	30128635	30153687	30160858				605701	Tripartite motif-containing 10
33	TRIM15	NM_033229	7	+	30131461	30140126	30163684	30172349					Tripartite motif-containing 15
34	TRIM26	NM_003449	10	-	30153652	30166880	30185875	30199103				600830	Tripartite motif-containing 26
35	TRIM39	NM_021253	9	+	30297094	30310036	30329317	30342259	RNF23	TFP		605700	Tripartite motif-containing 39
36	RPP21	NM_001199120	5	+	30312948	30314587	30345171	30346810				612524	Ribonuclease P/MRP, 21kD subunit
37	HLA-E	NM_005516	8	+	30457308	30460358	30489531	30492581				143010	Human leukocyte Antigen, class I, E
38	GNL1	NM_005275	12	-	30513848	30523980	30546071	30556203	HSR1			143024	Guanine nucleotide-binding protein-like 1
39	PRR3	NM_025263	4	+	30525121	30530272	30557344	30562495				607147	Proline-rich 3
40	ABCF1	NM_001025091	25	+	30539264	30558478	30571487	30590701	ABC50			603429	ATP-binding cassette 50, TNF-alpha stimulated
41	PPP1R10	NM_002714	20	-	30569325	30577721	30601548	30609944	PNUTS			603771	Protein phosphatase 1, regulatory subunit 10
42	MRPS18B	NM_014046	7	+	30585642	30593574	30617865	30625797	MRPS18-2			611982	Mitochondrial ribosomal protein S18B
43	ATAT1	NM_001031722	13	+	30594980	30614420	30627203	30646643	MEC17	C6orf134		615556	Alpha-tubulin acetyltransferase 1
44	C6orf136	NM_001109938	6	+	30615008	30620692	30647231	30652915
45	DHX16	NM_001164239	20	-	30621018	30640759	30653241	30672982	DDX16	DBP2	PRP8	603405	DEAH (Asp-Glu-Ala-His) box polypeptide 16
46	PPP1R18	NM_001134870	4	-	30645045	30653795	30677268	30686018				610990	Protein Phosphatase 1, Regulatory Subunit 18
47	NRM	NM_007243	5	-	30656437	30658751	30688660	30690974					Nurim (Nuclear Envelope Membrane Protein)
48	MDC1	NM_014641	15	-	30668241	30682952	30700464	30715175	NFBD1	KIAA0170		607593	Mediator of DNA damage checkpoint protein 1
49	TUBB	NM_001293213	5	+	30688283	30692174	30720506	30724397	TUBB5	M40	CDCBM6	191130	Tubulin, beta polypeptide
50	FLOT1	NM_005803	13	-	30695892	30709966	30728115	30742189				606998	Flotillin 1
51	IER3	NM_003897	2	-	30711712	30712295	30743935	30744518	DIF2	IEX1	PRG1	602996	Immediate early response-3
52	DDR1	NM_001954	19	+	30856506	30867073	30888729	30899296	NEP	CAK	HGK2	600408	discoidin domain receptor tyrosine kinase 1
53	GTF2H4	NM_001517	14	+	30876813	30881760	30909036	30913983				601760	General transcription factor IIH, polypeptide 4
54	VARS2	NM_001167734	30	+	30882188	30893987	30914411	30926210	KIAA1885	COXPD20		612802	Valyl-tRNA synthetase 2
55	SFTA2	NM_205854	3	-	30899264	30899873	30931487	30932096					Surfactant Associated 2
56	DPCR1	NM_080870	3	+	30908776	30920894	30940999	30953117	C6orf37			613928	Diffuse panbronchiolitis critical region gene 1
57	MUC21	NM_001010909	3	+	30951735	30955971	30983958	30988194	epiglycanin				Mucin 21
58	MUC22	NM_001198815	5	+	30978483	31002715	31010706	31034938	PBMUCL1			613917	Mucin 22
59	C6orf15	NM_014070	2	-	31079157	31080332	31111380	31112555
60	CDSN	NM_001264	2	-	31083801	31088196	31116024	31120419	HTSS1	HYPT2	PSS1	602593	Corneodesmosin
61	PSORS1C1	NM_014068	6	+	31097409	31107709	31129632	31139932				613525	Psoriasis Susceptibility 1 Candidate 1
62	PSORS1C2	NM_014069	2	-	31105727	31106803	31137950	31139026				613526	Psoriasis Susceptibility 1 Candidate 2
63	CCHCR1	NM_001105563	18	-	31110368	31125377	31142591	31157600	HCR	C6ORF18		605310	Coiled-coil alpha-helical rod protein 1
64	TCF19	NM_001077511	4	+	31127246	31130494	31159469	31162717	SC1			600912	Transcription factor-19 (SC1)
65	POU5F1	NM_001173531	5	-	31132377	31133719	31164600	31165942	OTF3	37895		164177	Pou domain, class 5, transcription factor 1 (octamer-binding transcription factor 3)
66	HLA-C	NM_001243042	8	-	31236945	31239848	31269168	31272071				142840	Human leukocyte Antigen, class I, C
67	HLA-B	NM_005514	8	-	31322259	31324935	31354482	31357158				142830	Human leukocyte Antigen, class I, B
68	MICA	NM_000247	7	+	31371409	31382916	31403632	31415139				600169	MHC class I polypeptide-related sequence A
69	MICB	NM_001289160	6	+	31473419	31477686	31505642	31509909				602436	MHC class I polypeptide-related sequence B
70	MCCD1	NM_001011700	2	+	31496791	31497712	31529014	31529935				609624	Mitochondrial coiled-coil domain 1
71	DDX39B	NM_004640	11	-	31498210	31508309	31530433	31540532	BAT1	D6S81E		142560	DEAD box polypeptide 39Bipt-1
72	ATP6V1G2	NM_001204078	3	-	31513184	31514336	31545407	31546559	ATP6G			606853	ATPase, H+ transporting, lysosomal, 13kD, V1 subunit G isoform 2
73	NFKBIL1	NM_001144961	4	+	31515471	31526388	31547694	31558611				601022	Nuclear factor of kappa light polypeptide gene enhancer in B-cells inhibitor-like 1
74	LTA	NM_000595	4	+	31540519	31541470	31572742	31573693	TNFB			153440	Lymphotoxin alpha (formerly tumor necrosis factor beta)
75	TNF	NM_000594	4	+	31543518	31545314	31575741	31577537	TNFA			191160	Tumor necrosis factor (cachectin)
76	LTB	NM_002341	4	-	31548485	31550194	31580708	31582417	TNFC			600978	Lymphotoxin B
77	LST1	NM_205839	5	+	31555076	31556453	31587299	31588676	D6S49E	B144		109170	Leukocyte-specific transcript 1 (B144 protein)
78	NCR3	NM_001145466	4	-	31556970	31560498	31589193	31592721	1C7	NKP30	CD337	611550	Natural cytotoxicity triggering receptor 3
79	AIF1	NM_001623	6	+	31583106	31584677	31615329	31616900	IRT1			601833	Allograft inflammatory factor 1
80	PRRC2A	NM_004638	31	+	31590566	31605363	31622789	31637586	BAT2	D6S51E		142580	Proline-rich coiled-coil protein 2A
81	BAG6	NM_001098534	25	-	31606907	31619540	31639130	31651763	BAT3	D6S52E		142590	BCL2-associated athanogene 6
82	APOM	NM_001256169	6	+	31624350	31625866	31656573	31658089	NG20	G3A		606907	Apolipoprotein M
83	C6orf47	NM_021184	1	-	31626839	31627724	31659062	31659947
84	GPANK1	NM_001199237	4	-	31630042	31632255	31662265	31664478	BAT4	D6S54E		142610	G patch domain- and ankyrin repeats-containing protein 1
85	CSNK2B	NM_001282385	7	+	31634608	31637703	31666831	31669926				115441	Casein kinase-2, beta polypeptide
86	LY6G5B	NM_021221	3	+	31638727	31640059	31670950	31672282	G5B			610433	Lymphocyte antigen 6 complex, locus G5B
87	LY6G5C	NM_025262	3	-	31644733	31648150	31676956	31680373	G5C			610434	Lymphocyte antigen 6 complex, locus G5C
88	ABHD16A	NM_021160	20	-	31654988	31671058	31687211	31703281	BAT5	D6S82E		142620	Abhydrolase domain-containing 16A
89	LY6G6F	NM_001003693	6	+	31674683	31678368	31706906	31710591				611404	Lymphocyte Antigen 6 Complex, Locus G6F
90	LY6G6D	NM_021246	3	+	31683132	31685581	31715355	31717804	MEGT1	G6D	C6orf23	606038	Lymphocyte antigen 6 complex, locus G6D
91	LY6G6C	NM_025261	3	-	31686872	31689456	31719095	31721679	G6C			610435	Lymphocyte antigen 6 complex, locus G6C
92	C6orf25	NM_025260	6	+	31691160	31692820	31723383	31725043
93	DDAH2	NM_013974	7	-	31695013	31696938	31727236	31729161				604744	Dimethylarginine dimethylaminohydrolase-2
94	CLIC1	NM_001287593	7	-	31698618	31704077	31730841	31736300				602872	Chloride Intracellular Channel 1
95	MSH5	NM_002441	25	+	31708243	31730308	31740466	31762531				603382	MutS Homolog 5
96	SAPCD1	NM_001039651	5	+	31730831	31732308	31763054	31764531					Suppressor APC Domain Containing 1
97	VWA7	NM_025258	17	-	31733370	31744556	31765593	31776779	C6orf27	G7C		609693	von Willebrand factor A domain-containing protein 7
98	VARS	NM_006295	30	-	31745370	31762994	31777593	31795217				192150	Valyl-TRNA Synthetase
99	LSM2	NM_021177	5	-	31765533	31774534	31797756	31806757	C6orf28			607282	LSM2 protein
100	HSPA1L	NM_005527	2	-	31777823	31779749	31810046	31811972				140559	Heat-shock 70kD protein-like-1
101	HSPA1A	NM_005345	1	+	31783533	31785459	31815756	31817682				140550	Heat-shock 70kD protein-1A
102	HSPA1B	NM_005346	1	+	31795727	31797653	31827950	31829876				603012	Heat-shock 70kD protein-1B
103	C6orf48	NM_001040437	5	+	31805105	31807440	31837328	31839663
104	NEU1	NM_000434	6	-	31827495	31830553	31859718	31862776	NEU	SIAL1		608272	Neuraminidase 1 (lysosomal sialidase; sialidase 1)
105	SLC44A4	NM_001178045	21	-	31831403	31843642	31863626	31875865	CTL4	C6orf29		606107	Solute carrier family 44, member 4
106	EHMT2	NM_006709	28	-	31847860	31865454	31880083	31897677	GAT8	G9A	NG36	604599	Euchromatic histone-lysine N-methyltransferase 2
107	ZBTB12	NM_181842	2	-	31867702	31869082	31899925	31901305					Zinc Finger And BTB Domain Containing 12
108	C2	NM_000063	18	+	31895529	31913134	31927752	31945357	ARMD14			613927	Complement component-2
109	CFB	NM_001710	18	+	31913998	31919807	31946221	31952030	BF	GBG	AHUS4	138470	Complement factor B
110	NELFE	NM_002904	11	-	31920077	31926223	31952300	31958446				154040	Negative Elongation Factor Complex Member E
111	SKIV2L	NM_006929	28	+	31926969	31937492	31959192	31969715	SKI2	SKI2W	THES2	600478	Superkiller viralicidic activity 2, S. cerevisiae, homolog, like
112	DXO	NM_005510	7	-	31937653	31939452	31969876	31971675				605996	Decapping And Exoribonuclease Protein
113	STK19	NM_004197	8	+	31939773	31948826	31971996	31981049	RP			604977	Serine/threonine protein kinase 19
114	C4A	NM_007293	41	+	31949884	31970317	31982107	32002540	C4S	C4AD		120810	Complement component-4A
115	C4B	NM_001002029	41	+	31949884	31970317	31982107	32002540	C4F	C4BD		120820	Complement component-4B
116	CYP21A2	NM_000500	11	+	31973465	31976176	32005688	32008399	CYP21	CA21H		613815	Cytochrome P450, subfamily XXIA, polypeptide 2 (steroid 21-hydroxylase)
117	TNXB	NM_019105	44	-	32009125	32065975	32041348	32098198	TNX	TNXB1	TNXBS	600985	Tenascin XB
118	ATF6B	NM_001136153	18	-	32083515	32095984	32115738	32128207	CREBL1			600984	Activating transcription factor 6 beta
119	FKBPL	NM_022110	2	-	32096507	32097557	32128730	32129780					FK506-Binding Protein-Like
120	PRRT1	NM_030651	4	-	32116998	32119604	32149221	32151827					Proline-Rich Transmembrane Protein 1
121	PPT2	NM_001204103	9	+	32122371	32130727	32154594	32162950				603298	Palmitoyl-protein thioesterase-2
122	EGFL8	NM_030652	9	+	32133942	32135733	32166165	32167956				609897	Epidermal growth factor-like 8
123	AGPAT1	NM_006411	7	-	32137052	32139273	32169275	32171496	LPAATA			603099	1-acylglycerol-3-phosphate O-acyltransferase 1 (lysophosphatidic acid acyltransferase-alpha)
124	RNF5	NM_006913	6	+	32146288	32148103	32178511	32180326	RING5			602677	RING finger protein-5
125	AGER	NM_001136	11	-	32148919	32151999	32181142	32184222	RAGE			600214	Advanced glycosylation end product-specific receptor
126	PBX2	NM_002586	9	-	32154158	32157692	32186381	32189915	HOX12	G17		176311	Pre-B-cell leukemia transcription factor-2
127	GPSM3	NM_022107	8	-	32159142	32160290	32191365	32192513					G-Protein Signaling Modulator 3
128	NOTCH4	NM_004557	30	-	32163213	32191705	32195436	32223928	INT3			164951	Notch, Drosophila, homolog of, 4
129	C6orf10	NM_001286474	26	-	32260757	32339483	32292980	32371706
130	BTNL2	NM_019602	6	-	32362512	32374900	32394735	32407123	SS2			606000	Butyrophilin-like protein 2
131	HLA-DRA	NM_019111	5	+	32407727	32411687	32439950	32443910				142860	Human leukocyte Antigen, class II, DR alpha
132	HLA-DRB5	NM_002125	6	-	32485515	32498001	32517738	32530224				604776	Human leukocyte Antigen, class II, DR beta-5
133	HLA-DRB1	NM_001243965	7	-	32546867	32557519	32579090	32589742	SS1			142857	Human leukocyte Antigen, class II, DR beta-1
134	HLA-DQA1	NM_002122	5	+	32605235	32610541	32637458	32642764	CELIAC1			146880	Human leukocyte Antigen, class II, DQ alpha-1
135	HLA-DQB1	NM_001243961	6	-	32628012	32634384	32660235	32666607	CELIAC1			604305	Human leukocyte Antigen, class II, DQ beta-1
136	HLA-DQA2	NM_020056	5	+	32709220	32714171	32741443	32746394	HLA-DXA			613503	Human leukocyte Antigen, class II, DQ alpha-2
137	HLA-DQB2	NM_001198858	5	-	32724229	32731247	32756452	32763470	HLA-DXB			615161	Human leukocyte Antigen, class II, DQ beta-2
138	HLA-DOB	NM_002120	6	-	32780992	32784728	32813215	32816951				600629	Human leukocyte Antigen, class II, DO beta
139	TAP2	NM_000544	12	-	32796631	32806010	32828854	32838233	ABCB3	PSF2	RING11	170261	Transporter 2, ATP-binding cassette, subfamily B
140	PSMB8	NM_004159	6	-	32808735	32812190	32840958	32844413	LMP7	RING10	JMP	177046	Proteasome subunit, beta type, 8 (large multifunctional protease-7)
141	TAP1	NM_000593	11	-	32813355	32821593	32845578	32853816				170260	Transporter 1, ATP-Binding Cassette, Sub-Family B
142	PSMB9	NM_002800	6	+	32822006	32827309	32854229	32859532	LMP2	RING12		177045	Proteasome subunit, beta type, 9
143	HLA-DMB	NM_002118	6	-	32902747	32908584	32934970	32940807	RING7			142856	Human leukocyte Antigen, class II, DM beta
144	HLA-DMA	NM_006120	5	-	32916640	32920813	32948863	32953036	RING6			142855	Human leukocyte Antigen, class II, DM alpha
145	BRD2	NM_001291986	14	+	32943187	32948495	32975410	32980718	RING3	FSRG1		601540	Bromodomain-containing protein 2
146	HLA-DOA	NM_002119	5	-	32974614	32977313	33006837	33009536				142930	Human leukocyte Antigen, class II, DO alpha
147	HLA-DPA1	NM_001242524	6	-	33036426	33041347	33068649	33073570	HLADP			142880	Human leukocyte Antigen, class II, DP alpha-1
148	HLA-DPB1	NM_002121	6	+	33043818	33054015	33076041	33086238				142858	Human leukocyte Antigen, class II, DP beta-1
149	COL11A2	NM_080680	66	-	33131454	33160017	33163677	33192240	STL3	DFNA13	DFNB53	120290	Collagen XI, alpha-2 polypeptide
150	RXRB	NM_001270401	10	-	33162458	33168253	33194681	33200476				180246	Retinoid X receptor, beta
151	SLC39A7	NM_001077516	8	+	33169022	33171590	33201245	33203813	D6S2244E	HKE4		601416	Solute carrier family 39 (zinc transporter), member 7 (Ke4 gene, mouse, homolog of)
152	HSD17B8	NM_014234	9	+	33172445	33174431	33204668	33206654	FABGL	D6S2245E	HKE6	601417	Hydroxysteroid (17-beta) dehydrogenase 8 (Ke6 gene, mouse, homolog of)
153	RING1	NM_002931	7	+	33176599	33180176	33208822	33212399	RNF1			602045	RING finger protein-1
154	VPS52	NM_001289175	20	-	33218617	33236963	33250840	33269186	SACM2L			603443	Vacuolar protein sorting 52 homolog (S. cerevisiae)
155	RPS18	NM_022551	6	+	33239896	33244243	33272119	33276466				180473	Ribosomal protein S18
156	B3GALT4	NM_003782	1	+	33245196	33246333	33277419	33278556				603095	UDP-galactose:beta-N-acetylglucosamine beta-1,3-galactosyltransferase 4
157	WDR46	NM_001164267	15	-	33247052	33256947	33279275	33289170				611440	WD Repeat Domain 46
158	PFDN6	NM_001265595	5	+	33257633	33258622	33289856	33290845				605660	Prefoldin Subunit 6
159	RGL2	NM_004761	18	-	33259878	33266387	33292101	33298610				602306	Ral Guanine Nucleotide Dissociation Stimulator-Like 2
160	TAPBP	NM_003190	8	-	33269536	33281818	33301759	33314041	TPSN			601962	TAP-binding protein (tapasin)
161	ZBTB22	NM_001145338	2	-	33282788	33284693	33315011	33316916					Zinc Finger And BTB Domain Containing 22
162	DAXX	NM_001141969	8	-	33286519	33289702	33318742	33321925				603186	Deat-associated protein 6
163	KIFC1	NM_002263	11	+	33359762	33377467	33391985	33409690	KNSL2	HSET		603763	Kinesin family member C1
164	PHF1	NM_024165	15	+	33380040	33383875	33412263	33416098				602881	PHD finger protein-1
165	CUTA	NM_001014840	6	-	33384426	33385777	33416649	33418000					CutA Divalent Cation Tolerance Homolog
166	SYNGAP1	NM_006772	19	+	33388041	33419683	33420264	33451906	MRD5			603384	Synaptic Ras GTPase activating protein 1
167	ZBTB9	NM_152735	2	+	33422877	33424299	33455100	33456522					Zinc Finger And BTB Domain Containing 23

## Sheet: B_BLAST_CDS
Unique CDS	cell (allele name)	GenBank Accession	Length (bp)	Nearest hit accession	% Identity	mismatches	Nearest hit Title
ABCF1	00huref (PGF)	KY500134	2538	BC112923	100	0	Homo sapiens ATP-binding cassette, sub-family F (GCN20), member 1, mRNA (cDNA clone MGC:131563 IMAGE:7470309), complete cds
ABCF1	KOSE	KY500135	2538	BC112923.1	99.9707	1	Homo sapiens ATP-binding cassette, sub-family F (GCN20), member 1, mRNA (cDNA clone MGC:131563 IMAGE:7470309), complete cds
ABHD16A	00huref (PGF)	KY500136	1677	NM_021160	100	0	Homo sapiens abhydrolase domain containing 16A (ABHD16A), transcript variant 1, mRNA
ABHD16A	APD	KY500137	1677	AK023194.1	100	0	Homo sapiens cDNA FLJ13132 fis, clone NT2RP3003008
ABHD16A	BM14	KY500138	1677	NM_021160.2	99.8807	2	Homo sapiens abhydrolase domain containing 16A (ABHD16A), transcript variant 1, mRNA
ABHD16A	HOR	KY500139	1677	NM_021160.2	99.8807	2	Homo sapiens abhydrolase domain containing 16A (ABHD16A), transcript variant 1, mRNA
ABHD16A	LWAGS	KY500140	1677	NM_021160.2	99.8807	2	Homo sapiens abhydrolase domain containing 16A (ABHD16A), transcript variant 1, mRNA
ABHD16A	PLH	KY500141	1677	NM_021160.2	99.8807	2	Homo sapiens abhydrolase domain containing 16A (ABHD16A), transcript variant 1, mRNA
ABHD16A	QBL	KY500142	1677	NM_021160.2	99.8807	2	Homo sapiens abhydrolase domain containing 16A (ABHD16A), transcript variant 1, mRNA
ABHD16A	SA1	KY500143	1677	NM_021160.2	99.8807	2	Homo sapiens abhydrolase domain containing 16A (ABHD16A), transcript variant 1, mRNA
AGER	00huref (COX)	KY500144	1215	NM_001136	100	0	Homo sapiens advanced glycosylation end product-specific receptor (AGER), transcript variant 1, mRNA
AGER	APD	KY500145	1215	NM_001136.4	99.9158	1	Homo sapiens advanced glycosylation end product-specific receptor (AGER), transcript variant 1, mRNA
AGER	IBW9	KY500146	1215	NM_001136.4	99.9158	1	Homo sapiens advanced glycosylation end product-specific receptor (AGER), transcript variant 1, mRNA
AGER	JBUSH	KY500147	1215	NM_001136.4	99.9158	1	Homo sapiens advanced glycosylation end product-specific receptor (AGER), transcript variant 1, mRNA
AGER	PGF	KY500148	1215	NM_001136.4	99.9158	1	Homo sapiens advanced glycosylation end product-specific receptor (AGER), transcript variant 1, mRNA
AGPAT1	00huref (PGF)	KY500149	852	XM_011514234	100	0	PREDICTED: Homo sapiens 1-acylglycerol-3-phosphate O-acyltransferase 1 (AGPAT1), transcript variant X3, mRNA
AGPAT1	KGU	KY500150	852	XM_011514234	99.88	1	PREDICTED: Homo sapiens 1-acylglycerol-3-phosphate O-acyltransferase 1 (AGPAT1), transcript variant X3, mRNA
AIF1	00huref (PGF)	KY500151	444	JQ782414	100	0	Homo sapiens allograft inflammatory factor 1 isoform 3 (AIF1) mRNA, complete cds, alternatively spliced
AIF1	RSH	KY500152	444	AK290771	100	0	Homo sapiens cDNA FLJ76389 complete cds, highly similar to Homo sapiens allograft inflammatory factor 1 (AIF1), transcript variant 3, mRNA
APOM	00huref (PGF)	KY500153	351	NM_001256169	100	0	Homo sapiens apolipoprotein M (APOM), transcript variant 2, mRNA
APOM	APD	KY500154	351	NM_001256169	99.72	1	Homo sapiens apolipoprotein M (APOM), transcript variant 2, mRNA
ATAT1	00huref (PGF)	KY500155	1230	NM_001031722	100	0	Homo sapiens alpha tubulin acetyltransferase 1 (ATAT1), transcript variant 1, mRNA
ATAT1	AMA1	KY500156	1230	NM_001031722	99.92	1	Homo sapiens alpha tubulin acetyltransferase 1 (ATAT1), transcript variant 1, mRNA
ATF6B	00huref (PGF)	KY500157	2103	NM_001136153	100	0	Homo sapiens activating transcription factor 6 beta (ATF6B), transcript variant 2, mRNA
ATF6B	APD	KY500158	2103	NM_001136153	99.95	1	Homo sapiens activating transcription factor 6 beta (ATF6B), transcript variant 2, mRNA
ATF6B	BTB	KY500159	2103	NM_001136153	99.9	2	Homo sapiens activating transcription factor 6 beta (ATF6B), transcript variant 2, mRNA
ATF6B	MOU	KY500160	2103	NM_001136153	99.95	1	Homo sapiens activating transcription factor 6 beta (ATF6B), transcript variant 2, mRNA
B3GALT4	00huref (PGF)	KY500161	1137	FJ525877	100	0	Homo sapiens UDP-Gal:betaGlcNAc beta 1,3-galactosyltransferase, polypeptide 4 (B3GALT4) gene, complete cds
B3GALT4	OMW	KY500162	1137	FJ525877	99.91	1	Homo sapiens UDP-Gal:betaGlcNAc beta 1,3-galactosyltransferase, polypeptide 4 (B3GALT4) gene, complete cds
BAG6	00huref (PGF)	KY500163	3381	NM_080702	100	0	Homo sapiens BCL2-associated athanogene 6 (BAG6), transcript variant 2, mRNA
BAG6	APD	KY500164	3381	NM_080702	99.94	2	Homo sapiens BCL2-associated athanogene 6 (BAG6), transcript variant 2, mRNA
BAG6	DBB	KY500165	3381	NM_080702	99.97	1	Homo sapiens BCL2-associated athanogene 6 (BAG6), transcript variant 2, mRNA
BAG6	HOR	KY500166	3381	NM_080702	99.94	2	Homo sapiens BCL2-associated athanogene 6 (BAG6), transcript variant 2, mRNA
BAG6	LUY	KY500167	3381	NM_080702	99.94	2	Homo sapiens BCL2-associated athanogene 6 (BAG6), transcript variant 2, mRNA
BAG6	MGAR	KY500168	3381	NM_080702	99.97	1	Homo sapiens BCL2-associated athanogene 6 (BAG6), transcript variant 2, mRNA
BAG6	WJR076D	KY500169	3381	NM_080702	99.94	2	Homo sapiens BCL2-associated athanogene 6 (BAG6), transcript variant 2, mRNA
BAG6	WT49	KY500170	3381	NM_080702	99.97	1	Homo sapiens BCL2-associated athanogene 6 (BAG6), transcript variant 2, mRNA
BRD2	00huref (PGF)	KY500171	2046	NM_001113182	100	0	Homo sapiens bromodomain containing 2 (BRD2), transcript variant 2, mRNA
BRD2	AKIBA	KY500172	2046	NM_001113182	99.95	1	Homo sapiens bromodomain containing 2 (BRD2), transcript variant 2, mRNA
BRD2	AMALA	KY500173	2046	NM_001113182	99.95	1	Homo sapiens bromodomain containing 2 (BRD2), transcript variant 2, mRNA
BRD2	BEI	KY500174	2046	NM_001113182	99.9	2	Homo sapiens bromodomain containing 2 (BRD2), transcript variant 2, mRNA
BRD2	BM14	KY500175	2046	NM_001113182	99.9	2	Homo sapiens bromodomain containing 2 (BRD2), transcript variant 2, mRNA
BRD2	DBB	KY500176	2046	NM_001113182	99.95	1	Homo sapiens bromodomain containing 2 (BRD2), transcript variant 2, mRNA
BRD2	KGU	KY500177	2046	NM_001113182	99.95	1	Homo sapiens bromodomain containing 2 (BRD2), transcript variant 2, mRNA
BRD2	LD2B	KY500178	2046	NM_001113182	99.95	1	Homo sapiens bromodomain containing 2 (BRD2), transcript variant 2, mRNA
BRD2	MADURA	KY500179	2046	NM_001113182	99.95	1	Homo sapiens bromodomain containing 2 (BRD2), transcript variant 2, mRNA
BRD2	MOU	KY500180	2046	NM_001113182	99.9	2	Homo sapiens bromodomain containing 2 (BRD2), transcript variant 2, mRNA
BTNL2	00huref (PGF)	KY500181	1368	AH008353	100	0	Homo sapiens butyrophilin-like (BTLII) gene, complete cds
BTNL2	31227ABO	KY500182	1368	AH008353	99.34	9	Homo sapiens butyrophilin-like (BTLII) gene, complete cds
BTNL2	AKIBA	KY500183	1368	AH008353	98.61	19	Homo sapiens butyrophilin-like (BTLII) gene, complete cds
BTNL2	AMA1	KY500184	1368	AH008353	100	0	Homo sapiens butyrophilin-like (BTLII) gene, complete cds
BTNL2	AZH	KY500185	1368	AH008353	99.93	1	Homo sapiens butyrophilin-like (BTLII) gene, complete cds
BTNL2	HOR	KY500186	1368	AH008353	99.93	1	Homo sapiens butyrophilin-like (BTLII) gene, complete cds
BTNL2	JESTHOM	KY500187	1368	AH008353	99.56	6	Homo sapiens butyrophilin-like (BTLII) gene, complete cds
BTNL2	LUY	KY500188	1368	AH008353	98.9	15	Homo sapiens butyrophilin-like (BTLII) gene, complete cds
BTNL2	MCF	KY500189	1368	AH008353	99.71	4	Homo sapiens butyrophilin-like (BTLII) gene, complete cds
BTNL2	OMW	KY500190	1368	AH008353	98.98	14	Homo sapiens butyrophilin-like (BTLII) gene, complete cds
BTNL2	YAR	KY500191	1368	AH008353	99.63	5	Homo sapiens butyrophilin-like (BTLII) gene, complete cds
C2	00huref (PGF)	KY500771	2259	NM_000063	100	0	Homo sapiens complement component 2 (C2), transcript variant 1, mRNA
C2	AWELLS	KY500772	2259	NM_000063	99.96	1	Homo sapiens complement component 2 (C2), transcript variant 1, mRNA
C2	LWAGS	KY500773	2259	NM_000063	99.96	1	Homo sapiens complement component 2 (C2), transcript variant 1, mRNA
C2	MOU	KY500774	2259	NM_000063	99.96	1	Homo sapiens complement component 2 (C2), transcript variant 1, mRNA
C2	TEM	KY500775	2259	NM_000063	99.96	1	Homo sapiens complement component 2 (C2), transcript variant 1, mRNA
C2	WJR076D	KY500776	2259	NM_000063	99.96	1	Homo sapiens complement component 2 (C2), transcript variant 1, mRNA
C6ORF10	00huref (PGF)	KY500192	1686	XM_011514242	100	0	PREDICTED: Homo sapiens chromosome 6 open reading frame 10 (C6orf10), transcript variant X29, mRNA
C6ORF10	AKIBA	KY500193	1686	XM_011514242	99.88	2	PREDICTED: Homo sapiens chromosome 6 open reading frame 10 (C6orf10), transcript variant X29, mRNA
C6ORF10	APD	KY500194	1686	XM_011514242	99.64	6	PREDICTED: Homo sapiens chromosome 6 open reading frame 10 (C6orf10), transcript variant X29, mRNA
C6ORF10	BM09	KY500195	1686	XM_011514242	99.88	2	PREDICTED: Homo sapiens chromosome 6 open reading frame 10 (C6orf10), transcript variant X29, mRNA
C6ORF10	BM15	KY500196	1686	XM_011514242	99.64	6	PREDICTED: Homo sapiens chromosome 6 open reading frame 10 (C6orf10), transcript variant X29, mRNA
C6ORF10	BM16	KY500197	1686	XM_011514242	99.94	1	PREDICTED: Homo sapiens chromosome 6 open reading frame 10 (C6orf10), transcript variant X29, mRNA
C6ORF10	COX	KY500198	1686	XM_011514242	99.7	5	PREDICTED: Homo sapiens chromosome 6 open reading frame 10 (C6orf10), transcript variant X29, mRNA
C6ORF10	DBB	KY500199	1686	XM_011514242	99.82	3	PREDICTED: Homo sapiens chromosome 6 open reading frame 10 (C6orf10), transcript variant X29, mRNA
C6ORF10	LWAGS	KY500200	1686	XM_011514242	99.94	1	PREDICTED: Homo sapiens chromosome 6 open reading frame 10 (C6orf10), transcript variant X29, mRNA
C6ORF10	WT49	KY500201	1686	XM_011514242	99.58	7	PREDICTED: Homo sapiens chromosome 6 open reading frame 10 (C6orf10), transcript variant X29, mRNA
C6orf136	00huref (PGF)	KY500223	948	NM_001109938	100	0	Homo sapiens chromosome 6 open reading frame 136 (C6orf136), transcript variant 1, mRNA
C6orf136	HOR	KY500224	948	NM_001109938	99.89	1	Homo sapiens chromosome 6 open reading frame 136 (C6orf136), transcript variant 1, mRNA
C6orf15	00huref (PGF)	KY500202	978	NM_014070	100	0	Homo sapiens chromosome 6 open reading frame 15 (C6orf15), mRNA
C6orf15	31227ABO	KY500203	978	NM_014070	99.39	6	Homo sapiens chromosome 6 open reading frame 15 (C6orf15), mRNA
C6orf15	AKIBA	KY500204	978	AB031481	99.59	4	Homo sapiens STG mRNA, complete cds
C6orf15	AMA1	KY500205	978	AB031481	99.9	1	Homo sapiens STG mRNA, complete cds
C6orf15	BM09	KY500206	978	AB031481	99.8	2	Homo sapiens STG mRNA, complete cds
C6orf15	CALOGERO	KY500207	978	NM_014070	99.9	1	Homo sapiens chromosome 6 open reading frame 15 (C6orf15), mRNA
C6orf15	COX	KY500208	978	AY358438	100	0	Homo sapiens clone DNA59844 STG (UNQ1840) mRNA, complete cds
C6orf15	JBUSH	KY500209	978	AY358438	99.8	2	Homo sapiens clone DNA59844 STG (UNQ1840) mRNA, complete cds
C6orf15	QBL	KY500210	978	AY358438	99.8	2	Homo sapiens clone DNA59844 STG (UNQ1840) mRNA, complete cds
C6orf15	RSH	KY500211	978	AY358438	99.9	1	Homo sapiens clone DNA59844 STG (UNQ1840) mRNA, complete cds
C6orf15	SPL	KY500212	978	AB031481	99.69	3	Homo sapiens STG mRNA, complete cds
C6orf15	SSTO	KY500213	978	AB031481	99.69	3	Homo sapiens STG mRNA, complete cds
C6orf25	00huref (PGF)	KY500214	714	NM_025260	100	0	Homo sapiens chromosome 6 open reading frame 25 (C6orf25), transcript variant 1, mRNA
C6orf25	BTB	KY500215	714	NM_025260	99.86	1	Homo sapiens chromosome 6 open reading frame 25 (C6orf25), transcript variant 1, mRNA
C6orf25	MOU	KY500216	714	NM_025260	99.86	1	Homo sapiens chromosome 6 open reading frame 25 (C6orf25), transcript variant 1, mRNA
C6orf25	QBL	KY500217	714	AJ292259	100	0	Homo sapiens mRNA for G6b-A protein (G6B gene), isoform A
C6orf25	RSH	KY500218	714	NM_025260	99.86	1	Homo sapiens chromosome 6 open reading frame 25 (C6orf25), transcript variant 1, mRNA
C6orf47	00huref (PGF)	KY500219	885	AK315349	100	0	Homo sapiens cDNA, FLJ96393
C6orf47	31227ABO	KY500220	885	CR753842	99.89	1	Human DNA sequence from clone DADB-127H9 on chromosome 6, complete sequence
C6orf47	APD	KY500221	885	CR753842	100	0	Human DNA sequence from clone DADB-127H9 on chromosome 6, complete sequence
C6orf47	AZH	KY500222	885	CR753842	99.89	1	Human DNA sequence from clone DADB-127H9 on chromosome 6, complete sequence
C6orf48	00huref (PGF)		228	NM_001287483	100	0	Homo sapiens chromosome 6 open reading frame 48 (C6orf48), transcript variant 4, mRNA
CCHCR1	00huref (PGF)	KY500225	2508	NM_001105563	100	0	Homo sapiens coiled-coil alpha-helical rod protein 1 (CCHCR1), transcript variant 2, mRNA
CCHCR1	31227ABO	KY500226	2508	NM_001105563	99.68	8	Homo sapiens coiled-coil alpha-helical rod protein 1 (CCHCR1), transcript variant 2, mRNA
CCHCR1	AKIBA	KY500227	2508	NM_001105563	99.8	5	Homo sapiens coiled-coil alpha-helical rod protein 1 (CCHCR1), transcript variant 2, mRNA
CCHCR1	AMA1	KY500228	2508	NM_001105563	99.88	3	Homo sapiens coiled-coil alpha-helical rod protein 1 (CCHCR1), transcript variant 2, mRNA
CCHCR1	APD	KY500229	2508	BC110534	99.8	5	Homo sapiens coiled-coil alpha-helical rod protein 1, mRNA (cDNA clone MGC:126371 IMAGE:40035162), complete cds
CCHCR1	AWELLS	KY500230	2508	NM_001105563	99.72	7	Homo sapiens coiled-coil alpha-helical rod protein 1 (CCHCR1), transcript variant 2, mRNA
CCHCR1	BER	KY500231	2508	BC110534	99.8	5	Homo sapiens coiled-coil alpha-helical rod protein 1, mRNA (cDNA clone MGC:126371 IMAGE:40035162), complete cds
CCHCR1	BM09	KY500232	2508	BC110534	99.68	8	Homo sapiens coiled-coil alpha-helical rod protein 1, mRNA (cDNA clone MGC:126371 IMAGE:40035162), complete cds
CCHCR1	BM21	KY500233	2508	BC110534	99.72	7	Homo sapiens coiled-coil alpha-helical rod protein 1, mRNA (cDNA clone MGC:126371 IMAGE:40035162), complete cds
CCHCR1	CALOGERO	KY500234	2508	NM_001105563	99.92	2	Homo sapiens coiled-coil alpha-helical rod protein 1 (CCHCR1), transcript variant 2, mRNA
CCHCR1	COX	KY500235	2508	BC110534	99.84	4	Homo sapiens coiled-coil alpha-helical rod protein 1, mRNA (cDNA clone MGC:126371 IMAGE:40035162), complete cds
CCHCR1	FPAF	KY500236	2508	BC110534	99.64	9	Homo sapiens coiled-coil alpha-helical rod protein 1, mRNA (cDNA clone MGC:126371 IMAGE:40035162), complete cds
CCHCR1	HOR	KY500237	2508	NM_001105563	99.96	1	Homo sapiens coiled-coil alpha-helical rod protein 1 (CCHCR1), transcript variant 2, mRNA
CCHCR1	IBW9	KY500238	2508	BC110534	99.88	3	Homo sapiens coiled-coil alpha-helical rod protein 1, mRNA (cDNA clone MGC:126371 IMAGE:40035162), complete cds
CCHCR1	ISH3	KY500239	2508	BC110534	99.64	9	Homo sapiens coiled-coil alpha-helical rod protein 1, mRNA (cDNA clone MGC:126371 IMAGE:40035162), complete cds
CCHCR1	JBUSH	KY500240	2508	NM_001105563	99.8	5	Homo sapiens coiled-coil alpha-helical rod protein 1 (CCHCR1), transcript variant 2, mRNA
CCHCR1	KGU	KY500241	2508	BC110534	99.64	9	Homo sapiens coiled-coil alpha-helical rod protein 1, mRNA (cDNA clone MGC:126371 IMAGE:40035162), complete cds
CCHCR1	KRC005	KY500242	2508	NM_001105563	99.68	8	Homo sapiens coiled-coil alpha-helical rod protein 1 (CCHCR1), transcript variant 2, mRNA
CCHCR1	LUY	KY500243	2508	NM_001105563	99.8	5	Homo sapiens coiled-coil alpha-helical rod protein 1 (CCHCR1), transcript variant 2, mRNA
CCHCR1	MCF	KY500244	2508	NM_001105563	99.72	7	Homo sapiens coiled-coil alpha-helical rod protein 1 (CCHCR1), transcript variant 2, mRNA
CCHCR1	RSH	KY500245	2508	NM_001105563	99.76	6	Homo sapiens coiled-coil alpha-helical rod protein 1 (CCHCR1), transcript variant 2, mRNA
CCHCR1	TISI	KY500246	2508	BC110534	99.68	8	Homo sapiens coiled-coil alpha-helical rod protein 1, mRNA (cDNA clone MGC:126371 IMAGE:40035162), complete cds
CCHCR1	WT100BIS	KY500247	2508	BC110534	99.64	9	Homo sapiens coiled-coil alpha-helical rod protein 1, mRNA (cDNA clone MGC:126371 IMAGE:40035162), complete cds
CCHCR1	WT49	KY500248	2508	BC110534	99.76	6	Homo sapiens coiled-coil alpha-helical rod protein 1, mRNA (cDNA clone MGC:126371 IMAGE:40035162), complete cds
CDSN	00huref (COX)	KY500777	1587	KJ904434	100	0	Synthetic construct Homo sapiens clone ccsbBroadEn_13828 CDSN gene, encodes complete protein
CDSN	31227ABO	KY500778	1590	AF030130	99.75	4	Homo sapiens corneodesmosin mRNA, complete cds
CDSN	AKIBA	KY500779	1587	KJ904434	99.87	2	Synthetic construct Homo sapiens clone ccsbBroadEn_13828 CDSN gene, encodes complete protein
CDSN	APD	KY500780	1590	AF030130	99.87	2	Homo sapiens corneodesmosin mRNA, complete cds
CDSN	BER	KY500781	1590	AF030130	99.81	3	Homo sapiens corneodesmosin mRNA, complete cds
CDSN	HOR	KY500782	1590	AF030130	99.75	4	Homo sapiens corneodesmosin mRNA, complete cds
CDSN	MANIKA	KY500783	1590	AF030130	99.81	3	Homo sapiens corneodesmosin mRNA, complete cds
CDSN	MCF	KY500784	1590	AF030130	99.94	1	Homo sapiens corneodesmosin mRNA, complete cds
CDSN	PGF	KY500785	1590	NM_001264	99.81	3	Homo sapiens corneodesmosin (CDSN), mRNA
CDSN	QBL	KY500786	1590	AF030130	99.81	3	Homo sapiens corneodesmosin mRNA, complete cds
CDSN	RSH	KY500787	1587	KJ904434	99.87	2	Synthetic construct Homo sapiens clone ccsbBroadEn_13828 CDSN gene, encodes complete protein
CFB	00huref (PGF)	KY500249	2295	NM_001710	100	0	Homo sapiens complement factor B (CFB), mRNA
CFB	AMA1	KY500250	2295	BC004143	99.96	1	Homo sapiens complement factor B, mRNA (cDNA clone MGC:1795 IMAGE:2959705), complete cds
CFB	APD	KY500251	2295	AK130533	100	0	Homo sapiens cDNA FLJ27023 fis, clone SLV06567, highly similar to Complement factor B precursor (EC 3.4.21.47)
CFB	AWELLS	KY500252	2295	AK130533	99.91	2	Homo sapiens cDNA FLJ27023 fis, clone SLV06567, highly similar to Complement factor B precursor (EC 3.4.21.47)
CFB	BM09	KY500253	2295	BC004143	100	0	Homo sapiens complement factor B, mRNA (cDNA clone MGC:1795 IMAGE:2959705), complete cds
CFB	CB6B	KY500254	2295	L15702	99.96	1	Human complement factor B mRNA, complete cds
CFB	DKB	KY500255	2295	NM_001710	99.96	1	Homo sapiens complement factor B (CFB), mRNA
CFB	MOU	KY500256	2295	L15702	100	0	Human complement factor B mRNA, complete cds
CFB	QBL	KY500257	2295	AK130533	99.96	1	Homo sapiens cDNA FLJ27023 fis, clone SLV06567, highly similar to Complement factor B precursor (EC 3.4.21.47)
CLIC1	00huref (PGF)	KY500788	726	NM_001287594	100	0	Homo sapiens chloride intracellular channel 1 (CLIC1), transcript variant 3, mRNA
CLIC1	AZH	KY500789	723	NM_001287594	100	0	Homo sapiens chloride intracellular channel 1 (CLIC1), transcript variant 3, mRNA
COL11A2	00huref (PGF)	KY500258	5211	NM_080680	100	0	Homo sapiens collagen, type XI, alpha 2 (COL11A2), transcript variant 1, mRNA
COL11A2	AMA1	KY500259	5211	NM_080680	99.92	4	Homo sapiens collagen, type XI, alpha 2 (COL11A2), transcript variant 1, mRNA
COL11A2	APD	KY500260	5211	NM_080680	99.96	2	Homo sapiens collagen, type XI, alpha 2 (COL11A2), transcript variant 1, mRNA
COL11A2	CB6B	KY500261	5211	NM_080680	99.98	1	Homo sapiens collagen, type XI, alpha 2 (COL11A2), transcript variant 1, mRNA
COL11A2	COX	KY500262	5211	NM_080680	99.98	1	Homo sapiens collagen, type XI, alpha 2 (COL11A2), transcript variant 1, mRNA
COL11A2	IBW9	KY500263	5211	NM_080680	99.9	5	Homo sapiens collagen, type XI, alpha 2 (COL11A2), transcript variant 1, mRNA
COL11A2	JBUSH	KY500264	5211	NM_080680	99.9	5	Homo sapiens collagen, type XI, alpha 2 (COL11A2), transcript variant 1, mRNA
COL11A2	KAS116	KY500265	5211	NM_080680	99.92	4	Homo sapiens collagen, type XI, alpha 2 (COL11A2), transcript variant 1, mRNA
COL11A2	LBF	KY500266	5211	NM_080680	99.94	3	Homo sapiens collagen, type XI, alpha 2 (COL11A2), transcript variant 1, mRNA
COL11A2	MCF	KY500267	5211	NM_080680	99.94	3	Homo sapiens collagen, type XI, alpha 2 (COL11A2), transcript variant 1, mRNA
COL11A2	MOU	KY500268	5211	NM_080680	99.9	5	Homo sapiens collagen, type XI, alpha 2 (COL11A2), transcript variant 1, mRNA
COL11A2	PLH	KY500269	5211	NM_080680	99.9	5	Homo sapiens collagen, type XI, alpha 2 (COL11A2), transcript variant 1, mRNA
COL11A2	QBL	KY500270	5211	NM_080680	99.98	1	Homo sapiens collagen, type XI, alpha 2 (COL11A2), transcript variant 1, mRNA
COL11A2	SA1	KY500271	5211	NM_080680	99.94	3	Homo sapiens collagen, type XI, alpha 2 (COL11A2), transcript variant 1, mRNA
COL11A2	T7526	KY500272	5211	NM_080680	99.94	3	Homo sapiens collagen, type XI, alpha 2 (COL11A2), transcript variant 1, mRNA
COL11A2	WT49	KY500273	5211	NM_080680	99.9	5	Homo sapiens collagen, type XI, alpha 2 (COL11A2), transcript variant 1, mRNA
COL11A2	YAR	KY500274	5211	NM_080680	99.94	3	Homo sapiens collagen, type XI, alpha 2 (COL11A2), transcript variant 1, mRNA
CSNK2B	00huref (PGF)	KY500275	639	NM_001282385	100	0	Homo sapiens casein kinase 2, beta polypeptide (CSNK2B), transcript variant 2, mRNA
CSNK2B	31227ABO	KY500276	639	NM_001282385	99.84	1	Homo sapiens casein kinase 2, beta polypeptide (CSNK2B), transcript variant 2, mRNA
CUTA	00huref (PGF)		471	BC005890	100	0	Homo sapiens cutA divalent cation tolerance homolog (E. coli), mRNA (cDNA clone MGC:833 IMAGE:3505574), complete cds
DAXX	00huref (PGF)	KY500277	2223	NM_001141969	100	0	Homo sapiens death-domain associated protein (DAXX), transcript variant 1, mRNA
DAXX	AMA1	KY500278	2223	NM_001141969	99.96	1	Homo sapiens death-domain associated protein (DAXX), transcript variant 1, mRNA
DAXX	BM09	KY500279	2223	BC109073	99.96	1	Homo sapiens death-domain associated protein, mRNA (cDNA clone MGC:126245 IMAGE:40034214), complete cds
DAXX	BSM	KY500280	2223	NM_001141969	99.96	1	Homo sapiens death-domain associated protein (DAXX), transcript variant 1, mRNA
DAXX	CB6B	KY500281	2223	NM_001141969	99.96	1	Homo sapiens death-domain associated protein (DAXX), transcript variant 1, mRNA
DAXX	COX	KY500282	2223	BC109073	100	0	Homo sapiens death-domain associated protein, mRNA (cDNA clone MGC:126245 IMAGE:40034214), complete cds
DDAH2	00huref (PGF)	KY500283	858	XM_011514448	100	0	PREDICTED: Homo sapiens dimethylarginine dimethylaminohydrolase 2 (DDAH2), transcript variant X1, mRNA
DDAH2	AZH	KY500284	858	XM_011514448	99.88	1	PREDICTED: Homo sapiens dimethylarginine dimethylaminohydrolase 2 (DDAH2), transcript variant X1, mRNA
DDAH2	BOLETH	KY500285	858	XM_011514448	99.77	2	PREDICTED: Homo sapiens dimethylarginine dimethylaminohydrolase 2 (DDAH2), transcript variant X1, mRNA
DDR1	00huref (PGF)	KY500286	2631	NM_001297652	100	0	Homo sapiens discoidin domain receptor tyrosine kinase 1 (DDR1), transcript variant 7, mRNA
DDR1	APD	KY500287	2631	AK291621	99.96	1	Homo sapiens cDNA FLJ75091 complete cds, highly similar to Homo sapiens discoidin domain receptor family, member 1 (DDR1),transcript variant 2, mRNA
DDR1	AWELLS	KY500288	2631	AB210021	99.96	1	Homo sapiens mRNA for DDR1 variant protein, partial cds, clone: fk11093
DDR1	BOLETH	KY500289	2631	NM_001297652	99.96	1	Homo sapiens discoidin domain receptor tyrosine kinase 1 (DDR1), transcript variant 7, mRNA
DDR1	COX	KY500290	2631	AB210021	100	0	Homo sapiens mRNA for DDR1 variant protein, partial cds, clone: fk11093
DDR1	KAS116	KY500291	2631	NM_001297652	99.96	1	Homo sapiens discoidin domain receptor tyrosine kinase 1 (DDR1), transcript variant 7, mRNA
DDR1	LBF	KY500292	2631	AK291621	100	0	Homo sapiens cDNA FLJ75091 complete cds, highly similar to Homo sapiens discoidin domain receptor family, member 1 (DDR1),transcript variant 2, mRNA
DDR1	MANIKA	KY500293	2631	NM_001297652	99.96	1	Homo sapiens discoidin domain receptor tyrosine kinase 1 (DDR1), transcript variant 7, mRNA
DDX39B	00huref (PGF)	KY500294	1287	NM_004640	100	0	Homo sapiens DEAD (Asp-Glu-Ala-Asp) box polypeptide 39B (DDX39B), transcript variant 1, mRNA
DDX39B	COX	KY500295	1287	DQ891881	100	0	Synthetic construct clone IMAGE:100004511; FLH180891.01X; RZPDo839H02134D HLA-B associated transcript 1 (BAT1) gene, encodes complete protein
DDX39B	MANIKA	KY500296	1287	DQ891881	99.92	1	Synthetic construct clone IMAGE:100004511; FLH180891.01X; RZPDo839H02134D HLA-B associated transcript 1 (BAT1) gene, encodes complete protein
DHX16	00huref (PGF)	KY500297	2946	NM_001164239	100	0	Homo sapiens DEAH (Asp-Glu-Ala-His) box polypeptide 16 (DHX16), transcript variant 2, mRNA
DHX16	QBL	KY500298	2946	NM_003587	99.97	1	Homo sapiens DEAH (Asp-Glu-Ala-His) box polypeptide 16 (DHX16), transcript variant 1, mRNA
DPCR1	00huref	KY500299	4182	NM_080870	100	0	Homo sapiens diffuse panbronchiolitis critical region 1 (DPCR1), mRNA
DPCR1	APD	KY500300	4182	NM_080870	99.98	1	Homo sapiens diffuse panbronchiolitis critical region 1 (DPCR1), mRNA
DPCR1	COX	KY500301	4182	NM_080870	99.93	3	Homo sapiens diffuse panbronchiolitis critical region 1 (DPCR1), mRNA
DPCR1	HOR	KY500302	4182	NM_080870	99.93	3	Homo sapiens diffuse panbronchiolitis critical region 1 (DPCR1), mRNA
DPCR1	IBW9	KY500303	4182	NM_080870	99.9	4	Homo sapiens diffuse panbronchiolitis critical region 1 (DPCR1), mRNA
DPCR1	JO528239	KY500304	4182	NM_080870	99.88	5	Homo sapiens diffuse panbronchiolitis critical region 1 (DPCR1), mRNA
DPCR1	MCF	KY500305	4182	NM_080870	99.9	4	Homo sapiens diffuse panbronchiolitis critical region 1 (DPCR1), mRNA
DPCR1	MOU	KY500306	4182	NM_080870	99.95	2	Homo sapiens diffuse panbronchiolitis critical region 1 (DPCR1), mRNA
DPCR1	OMW	KY500307	4182	NM_080870	99.9	4	Homo sapiens diffuse panbronchiolitis critical region 1 (DPCR1), mRNA
DPCR1	PLH	KY500308	4182	NM_080870	99.88	5	Homo sapiens diffuse panbronchiolitis critical region 1 (DPCR1), mRNA
DPCR1	QBL	KY500309	4182	NM_080870	99.9	4	Homo sapiens diffuse panbronchiolitis critical region 1 (DPCR1), mRNA
DXO	00huref (PGF)	KY500310	1191	XM_006715005	100	0	PREDICTED: Homo sapiens decapping exoribonuclease (DXO), transcript variant X2, mRNA
DXO	AWELLS	KY500311	1191	XM_006715005	99.92	1	PREDICTED: Homo sapiens decapping exoribonuclease (DXO), transcript variant X2, mRNA
DXO	BTB	KY500312	1191	XM_006715005	99.92	1	PREDICTED: Homo sapiens decapping exoribonuclease (DXO), transcript variant X2, mRNA
DXO	CB6B	KY500313	1191	XM_006715005	99.92	1	PREDICTED: Homo sapiens decapping exoribonuclease (DXO), transcript variant X2, mRNA
DXO	DBB	KY500314	1191	XM_006725688	100	0	PREDICTED: Homo sapiens decapping exoribonuclease (DXO), transcript variant X2, mRNA
DXO	SLE005	KY500315	1191	XM_006715005	99.92	1	PREDICTED: Homo sapiens decapping exoribonuclease (DXO), transcript variant X2, mRNA
EGFL8	00huref (PGF)	KY500316	882	NM_030652	100	0	Homo sapiens EGF-like-domain, multiple 8 (EGFL8), transcript variant 1, mRNA
EGFL8	AMA1	KY500317	882	NM_030652	99.89	1	Homo sapiens EGF-like-domain, multiple 8 (EGFL8), transcript variant 1, mRNA
EGFL8	COX	KY500318	882	NM_030652	99.89	1	Homo sapiens EGF-like-domain, multiple 8 (EGFL8), transcript variant 1, mRNA
EGFL8	ISH3	KY500319	882	NM_030652	99.89	1	Homo sapiens EGF-like-domain, multiple 8 (EGFL8), transcript variant 1, mRNA
EGFL8	MCF	KY500320	882	NM_030652	99.89	1	Homo sapiens EGF-like-domain, multiple 8 (EGFL8), transcript variant 1, mRNA
EGFL8	PLH	KY500321	882	NM_030652	99.89	1	Homo sapiens EGF-like-domain, multiple 8 (EGFL8), transcript variant 1, mRNA
EHMT2	00huref (PGF)	KY500322	3633	NM_006709	100	0	Homo sapiens euchromatic histone-lysine N-methyltransferase 2 (EHMT2), transcript variant 2, mRNA
EHMT2	AMA1	KY500323	3633	NM_006709	99.97	1	Homo sapiens euchromatic histone-lysine N-methyltransferase 2 (EHMT2), transcript variant 2, mRNA
EHMT2	APD	KY500324	3633	NM_006709	99.94	2	Homo sapiens euchromatic histone-lysine N-methyltransferase 2 (EHMT2), transcript variant 2, mRNA
FKBPL	00huref (PGF)	KY500325	1050	XM_011514803	100	0	PREDICTED: Homo sapiens FK506 binding protein like (FKBPL), transcript variant X1, mRNA
FKBPL	DBB	KY500326	1050	KP861813	100	0	Homo sapiens peptidyl-prolyl cis-trans isomerase (FKBP4) mRNA, complete cds
FKBPL	WT51	KY500327	1050	XM_011514803	99.9	1	PREDICTED: Homo sapiens FK506 binding protein like (FKBPL), transcript variant X1, mRNA
FLOT1	00huref (PGF)	KY500328	1284	XM_005248780	100	0	PREDICTED: Homo sapiens flotillin 1 (FLOT1), transcript variant X1, mRNA
FLOT1	BM09	KY500329	1284	XM_005248780	99.92	1	PREDICTED: Homo sapiens flotillin 1 (FLOT1), transcript variant X1, mRNA
FLOT1	HOR	KY500330	1284	XM_005248780	99.92	1	PREDICTED: Homo sapiens flotillin 1 (FLOT1), transcript variant X1, mRNA
GABBR1	00huref (PGF)	KY500331	2886	XM_005248982	100	0	PREDICTED: Homo sapiens gamma-aminobutyric acid (GABA) B receptor, 1 (GABBR1), transcript variant X3, mRNA
GABBR1	AKIBA	KY500332	2886	XM_005274841	99.97	1	PREDICTED: Homo sapiens gamma-aminobutyric acid (GABA) B receptor, 1 (GABBR1), transcript variant X3, mRNA
GABBR1	APD	KY500333	2886	XM_005274841	100	0	PREDICTED: Homo sapiens gamma-aminobutyric acid (GABA) B receptor, 1 (GABBR1), transcript variant X3, mRNA
GABBR1	DBB	KY500334	2886	XM_005248982	99.97	1	PREDICTED: Homo sapiens gamma-aminobutyric acid (GABA) B receptor, 1 (GABBR1), transcript variant X3, mRNA
GABBR1	MOU	KY500335	2886	XM_005275088	100	0	PREDICTED: Homo sapiens gamma-aminobutyric acid (GABA) B receptor, 1 (GABBR1), transcript variant X3, mRNA
GABBR1	SLE005	KY500336	2886	XM_005248982	99.97	1	PREDICTED: Homo sapiens gamma-aminobutyric acid (GABA) B receptor, 1 (GABBR1), transcript variant X3, mRNA
GABBR1	STEINLIN	KY500337	2886	XM_005248982	99.97	1	PREDICTED: Homo sapiens gamma-aminobutyric acid (GABA) B receptor, 1 (GABBR1), transcript variant X3, mRNA
GABBR1	TEM	KY500338	2886	XM_005248982	99.97	1	PREDICTED: Homo sapiens gamma-aminobutyric acid (GABA) B receptor, 1 (GABBR1), transcript variant X3, mRNA
GABBR1	WT100BIS	KY500339	2886	XM_005275088	99.97	1	PREDICTED: Homo sapiens gamma-aminobutyric acid (GABA) B receptor, 1 (GABBR1), transcript variant X3, mRNA
GNL1	00huref (PGF)	KY500340	1824	XM_005249015	100	0	PREDICTED: Homo sapiens guanine nucleotide binding protein-like 1 (GNL1), transcript variant X1, mRNA
GNL1	APD	KY500341	1824	XM_005274939	100	0	PREDICTED: Homo sapiens guanine nucleotide binding protein-like 1 (GNL1), transcript variant X1, mRNA
GNL1	COX	KY500342	1824	XM_005272793	100	0	PREDICTED: Homo sapiens guanine nucleotide binding protein-like 1 (GNL1), transcript variant X1, mRNA
GNL1	MANIKA	KY500343	1824	XM_005274939	99.95	1	PREDICTED: Homo sapiens guanine nucleotide binding protein-like 1 (GNL1), transcript variant X1, mRNA
GPANK1	00huref (PGF)	KY500344	1071	XM_005249403	100	0	PREDICTED: Homo sapiens G patch domain and ankyrin repeats 1 (GPANK1), transcript variant X4, mRNA
GPANK1	31227ABO	KY500345	1071	XM_005249403	99.91	1	PREDICTED: Homo sapiens G patch domain and ankyrin repeats 1 (GPANK1), transcript variant X4, mRNA
GPANK1	AMA1	KY500346	1071	XM_005249403	99.81	2	PREDICTED: Homo sapiens G patch domain and ankyrin repeats 1 (GPANK1), transcript variant X4, mRNA
GPANK1	BM21	KY500347	1071	XM_005275043	99.91	1	PREDICTED: Homo sapiens G patch domain and ankyrin repeats 1 (GPANK1), transcript variant X1, mRNA
GPANK1	COX	KY500348	1071	XM_005272889	100	0	PREDICTED: Homo sapiens G patch domain and ankyrin repeats 1 (GPANK1), transcript variant X4, mRNA
GPANK1	DBB	KY500349	1071	XM_005275043	100	0	PREDICTED: Homo sapiens G patch domain and ankyrin repeats 1 (GPANK1), transcript variant X1, mRNA
GPANK1	QBL	KY500350	1071	XM_005275474	100	0	PREDICTED: Homo sapiens G patch domain and ankyrin repeats 1 (GPANK1), transcript variant X4, mRNA
GPANK1	RSH	KY500351	1071	XM_005249403	99.81	2	PREDICTED: Homo sapiens G patch domain and ankyrin repeats 1 (GPANK1), transcript variant X4, mRNA
GPSM3	00huref (PGF)	KY500352	483	NM_001276501	100	0	Homo sapiens G-protein signaling modulator 3 (GPSM3), transcript variant 1, mRNA
GPSM3	COX	KY500353	483	AF155657	100	0	Homo sapiens putative 17.9 kDa protein mRNA, complete cds
GPSM3	nuc	KY500354	483	NM_001276501	99.79	1	Homo sapiens G-protein signaling modulator 3 (GPSM3), transcript variant 1, mRNA
GPX5	00huref (PGF)		666	NM_001509	100	0	Homo sapiens glutathione peroxidase 5 (GPX5), transcript variant 1, mRNA
GTF2H4	00huref (PGF)	KY500355	1389	BC004935	100	0	Homo sapiens general transcription factor IIH, polypeptide 4, 52kDa, mRNA (cDNA clone MGC:10768 IMAGE:3606718), complete cds
GTF2H4	APD	KY500356	1389	Y07595	100	0	Homo sapiens mRNA for 52 kD subunit of transcription factor TFIIH (p52 gene)
GTF2H4	LBF	KY500357	1389	Y07595	99.93	1	Homo sapiens mRNA for 52 kD subunit of transcription factor TFIIH (p52 gene)
HLA-DQA2	00huref (PGF)	KY500358	768	NM_020056	100	0	Homo sapiens major histocompatibility complex, class II, DQ alpha 2 (HLA-DQA2), mRNA
HLA-DQA2	AKIBA	KY500359	768	NM_020056	99.87	1	Homo sapiens major histocompatibility complex, class II, DQ alpha 2 (HLA-DQA2), mRNA
HLA-DQA2	BH	KY500360	768	NM_020056	99.74	2	Homo sapiens major histocompatibility complex, class II, DQ alpha 2 (HLA-DQA2), mRNA
HLA-DQA2	BM15	KY500361	768	NM_020056	99.61	3	Homo sapiens major histocompatibility complex, class II, DQ alpha 2 (HLA-DQA2), mRNA
HLA-DQA2	BM16	KY500362	768	NM_020056	99.61	3	Homo sapiens major histocompatibility complex, class II, DQ alpha 2 (HLA-DQA2), mRNA
HLA-DQA2	DBB	KY500363	768	NM_020056	99.87	1	Homo sapiens major histocompatibility complex, class II, DQ alpha 2 (HLA-DQA2), mRNA
HLA-DQA2	FPAF	KY500364	768	NM_020056	99.74	2	Homo sapiens major histocompatibility complex, class II, DQ alpha 2 (HLA-DQA2), mRNA
HLA-DQA2	KAS011	KY500365	768	NM_020056	99.74	2	Homo sapiens major histocompatibility complex, class II, DQ alpha 2 (HLA-DQA2), mRNA
HLA-DQA2	MCF	KY500366	768	NM_020056	99.74	2	Homo sapiens major histocompatibility complex, class II, DQ alpha 2 (HLA-DQA2), mRNA
HLA-DQA2	MOU	KY500367	768	NM_020056	99.48	4	Homo sapiens major histocompatibility complex, class II, DQ alpha 2 (HLA-DQA2), mRNA
HLA-DQA2	RSH	KY500368	768	NM_020056	99.35	5	Homo sapiens major histocompatibility complex, class II, DQ alpha 2 (HLA-DQA2), mRNA
HLA-DQB2	00huref (PGF)	KY500369	660	XM_005249051	100	0	PREDICTED: Homo sapiens major histocompatibility complex, class II, DQ beta 2 (HLA-DQB2), transcript variant X1, mRNA
HLA-DQB2	AKIBA	KY500370	660	XM_011547646	99.85	1	PREDICTED: Homo sapiens major histocompatibility complex, class II, DQ beta 2 (HLA-DQB2), transcript variant X2, mRNA
HLA-DQB2	AMA1	KY500371	660	XM_005249051	99.69	2	PREDICTED: Homo sapiens major histocompatibility complex, class II, DQ beta 2 (HLA-DQB2), transcript variant X1, mRNA
HLA-DQB2	APD	KY500372	660	XM_005274855	100	0	PREDICTED: Homo sapiens major histocompatibility complex, class II, DQ beta 2 (HLA-DQB2), transcript variant X1, mRNA
HLA-DQB2	BM16	KY500373	660	XM_011547646	99.85	1	PREDICTED: Homo sapiens major histocompatibility complex, class II, DQ beta 2 (HLA-DQB2), transcript variant X2, mRNA
HLA-DQB2	DBB	KY500374	660	XM_011547646	100	0	PREDICTED: Homo sapiens major histocompatibility complex, class II, DQ beta 2 (HLA-DQB2), transcript variant X2, mRNA
HSD17B8	00huref (PGF)	KY500375	786	KJ892450	100	0	Synthetic construct Homo sapiens clone ccsbBroadEn_01844 HSD17B8 gene, encodes complete protein
HSD17B8	T7526	KY500376	786	KJ892450	99.87	1	Synthetic construct Homo sapiens clone ccsbBroadEn_01844 HSD17B8 gene, encodes complete protein
HSPA1A	00huref (PGF)	KY500377	1926	NG_011855	100	0	Homo sapiens heat shock 70kDa protein 1-like (HSPA1L), RefSeqGene on chromosome 6
HSPA1A	APD	KY500378	1926	AK291295	100	0	Homo sapiens cDNA FLJ75127 complete cds, highly similar to Homo sapiens heat shock 70kDa protein 1A, mRNA
HSPA1A	BEI	KY500379	1926	CR388202	99.95	1	Human DNA sequence from clone DADB-333F21 on chromosome 6, complete sequence
HSPA1A	BER	KY500380	1926	AF134726	99.95	1	Homo sapiens BAC clone 215O12 NG35, NG36, G9A, NG22, G9, HSP70-2, HSP70-1, HSP70-HOM, snRNP, G7A, NG37, NG23, and MutSH5 genes, complete cds
HSPA1A	BGED	KY500381	1926	CR388202	99.95	1	Human DNA sequence from clone DADB-333F21 on chromosome 6, complete sequence
HSPA1A	BSM	KY500382	1926	AK291295	99.95	1	Homo sapiens cDNA FLJ75127 complete cds, highly similar to Homo sapiens heat shock 70kDa protein 1A, mRNA
HSPA1A	DBB	KY500383	1926	CR388202	100	0	Human DNA sequence from clone DADB-333F21 on chromosome 6, complete sequence
HSPA1A	HO104	KY500384	1926	NG_011855	99.95	1	Homo sapiens heat shock 70kDa protein 1-like (HSPA1L), RefSeqGene on chromosome 6
HSPA1A	HOR	KY500385	1926	AF134726	99.9	2	Homo sapiens BAC clone 215O12 NG35, NG36, G9A, NG22, G9, HSP70-2, HSP70-1, HSP70-HOM, snRNP, G7A, NG37, NG23, and MutSH5 genes, complete cds
HSPA1A	QBL	KY500386	1926	AF134726	100	0	Homo sapiens BAC clone 215O12 NG35, NG36, G9A, NG22, G9, HSP70-2, HSP70-1, HSP70-HOM, snRNP, G7A, NG37, NG23, and MutSH5 genes, complete cds
HSPA1B	00huref (PGF)	KY500387	1926	AL671762	100	0	Human DNA sequence from clone CH501-254B15 on chromosome 6, complete sequence
HSPA1B	AMA1	KY500388	1926	BC057397	100	0	Homo sapiens heat shock 70kDa protein 1B, mRNA (cDNA clone MGC:60385 IMAGE:6188453), complete cds
HSPA1B	APD	KY500389	1926	DQ388429	100	0	Homo sapiens heat shock 70kDa protein 1B (HSPA1B) gene, complete cds
HSPA1B	BEI	KY500390	1926	CR388202	100	0	Human DNA sequence from clone DADB-333F21 on chromosome 6, complete sequence
HSPA1B	BER	KY500391	1926	NM_005346	99.95	1	Homo sapiens heat shock 70kDa protein 1B (HSPA1B), mRNA
HSPA1B	BSM	KY500392	1926	EU176434	100	0	Synthetic construct Homo sapiens clone IMAGE:100006510; FLH194202.01X; RZPDo839G0779D heat shock 70kDa protein 1A (HSPA1A) gene, encodes complete protein
HSPA1B	CB6B	KY500393	1926	AK291295	99.9	2	Homo sapiens cDNA FLJ75127 complete cds, highly similar to Homo sapiens heat shock 70kDa protein 1A, mRNA
HSPA1B	COX	KY500394	1926	NM_005346	100	0	Homo sapiens heat shock 70kDa protein 1B (HSPA1B), mRNA
HSPA1B	JHAF	KY500395	1926	NM_005346	99.95	1	Homo sapiens heat shock 70kDa protein 1B (HSPA1B), mRNA
HSPA1B	LD2B	KY500396	1926	NM_005346	100	0	Homo sapiens heat shock 70kDa protein 1B (HSPA1B), mRNA
HSPA1B	SWEIG	KY500397	1926	DQ388429	99.95	1	Homo sapiens heat shock 70kDa protein 1B (HSPA1B) gene, complete cds
HSPA1L	00huref (PGF)	KY500398	1926	XM_005249073	100	0	PREDICTED: Homo sapiens heat shock 70kDa protein 1-like (HSPA1L), transcript variant X3, mRNA
HSPA1L	AMA1	KY500399	1926	XM_005272816	99.95	1	PREDICTED: Homo sapiens heat shock 70kDa protein 1-like (HSPA1L), transcript variant X3, mRNA
HSPA1L	APD	KY500400	1926	XM_005274861	100	0	PREDICTED: Homo sapiens heat shock 70kDa protein 1-like (HSPA1L), transcript variant X3, mRNA
HSPA1L	BM14	KY500401	1926	XM_005272816	99.95	1	PREDICTED: Homo sapiens heat shock 70kDa protein 1-like (HSPA1L), transcript variant X3, mRNA
HSPA1L	COX	KY500402	1926	XM_005272816	100	0	PREDICTED: Homo sapiens heat shock 70kDa protein 1-like (HSPA1L), transcript variant X3, mRNA
HSPA1L	HOR	KY500403	1926	XM_005272816	99.9	2	PREDICTED: Homo sapiens heat shock 70kDa protein 1-like (HSPA1L), transcript variant X3, mRNA
HSPA1L	JHAF	KY500404	1926	XM_005272816	99.95	1	PREDICTED: Homo sapiens heat shock 70kDa protein 1-like (HSPA1L), transcript variant X3, mRNA
IER3	00huref (PGF)	KY500405	471	NM_003897	100	0	Homo sapiens immediate early response 3 (IER3), mRNA
IER3	APD	KY500406	471	AK314162	100	0	Homo sapiens cDNA, FLJ94872, Homo sapiens immediate early response 3 (IER3), transcript variantshort, mRNA
KIFC1	00huref (PGF)	KY500407	2022	NM_002263	100	0	Homo sapiens kinesin family member C1 (KIFC1), mRNA
KIFC1	AMA1	KY500408	2022	NM_002263	99.95	1	Homo sapiens kinesin family member C1 (KIFC1), mRNA
KIFC1	BM21	KY500409	2022	NM_002263	99.95	1	Homo sapiens kinesin family member C1 (KIFC1), mRNA
LOC100129636	00huref (PGF)		414	NR_125387	100	0	Homo sapiens uncharacterized LOC100129636 (LOC100129636), long non-coding RNA
LOC554223	00huref (PGF)	KY500790	570	NM_001207043	100	0	Homo sapiens histocompatibility antigen-related (LOC554223), mRNA
LOC554223	APD	KY500791	549	BC068238	100	0	Homo sapiens hypothetical LOC554223, mRNA (cDNA clone IMAGE:4828411)
LOC554223	HOR	KY500792	549	BC068238	99.78	1	Homo sapiens hypothetical LOC554223, mRNA (cDNA clone IMAGE:4828411)
LOC554223	IBW9	KY500793	549	BC068238	99.33	3	Homo sapiens hypothetical LOC554223, mRNA (cDNA clone IMAGE:4828411)
LOC554223	KGU	KY500794	570	NM_001207043	99.82	1	Homo sapiens histocompatibility antigen-related (LOC554223), mRNA
LSM2	00huref (PGF)		288	XM_518362	100	0	PREDICTED: Pan troglodytes LSM2 homolog, U6 small nuclear RNA associated (S. cerevisiae) (LSM2), mRNA
LST1	00huref (PGF)		294	NM_205839	100	0	Homo sapiens leukocyte specific transcript 1 (LST1), transcript variant 4, mRNA
LTA	00huref (PGF)	KY500410	618	XM_011514614	100	0	PREDICTED: Homo sapiens lymphotoxin alpha (LTA), transcript variant X4, mRNA
LTA	COX	KY500411	618	XM_011547250	100	0	PREDICTED: Homo sapiens lymphotoxin alpha (LTA), transcript variant X4, mRNA
LTA	DBB	KY500412	618	XM_011547653	100	0	PREDICTED: Homo sapiens lymphotoxin alpha (LTA), transcript variant X1, mRNA
LTA	DKB	KY500413	618	XM_011547653	99.84	1	PREDICTED: Homo sapiens lymphotoxin alpha (LTA), transcript variant X1, mRNA
LTB	00huref (PGF)	KY500414	735	BC069330	100	0	Homo sapiens lymphotoxin beta (TNF superfamily, member 3), transcript variant 1, mRNA (cDNA clone MGC:97002 IMAGE:7262211), complete cds
LTB	TAB	KY500415	735	BC069330	99.86	1	Homo sapiens lymphotoxin beta (TNF superfamily, member 3), transcript variant 1, mRNA (cDNA clone MGC:97002 IMAGE:7262211), complete cds
LY6G5B	00huref (PGF)	KY500416	606	HE864450	100	0	Homo sapiens partial mRNA for lymphocyte antigen-6 G5B splicing isoform 690 (LY6G5B gene)
LY6G5B	AMA1	KY500417	606	HE864450	99.83	1	Homo sapiens partial mRNA for lymphocyte antigen-6 G5B splicing isoform 690 (LY6G5B gene)
LY6G5B	IBW9	KY500418	606	HE864450	99.83	1	Homo sapiens partial mRNA for lymphocyte antigen-6 G5B splicing isoform 690 (LY6G5B gene)
LY6G5B	QBL	KY500419	606	HE864450	99.83	1	Homo sapiens partial mRNA for lymphocyte antigen-6 G5B splicing isoform 690 (LY6G5B gene)
LY6G5B	RSH	KY500420	606	HE864450	99.5	3	Homo sapiens partial mRNA for lymphocyte antigen-6 G5B splicing isoform 690 (LY6G5B gene)
LY6G5C	00huref (PGF)	KY500421	453	NM_025262	100	0	Homo sapiens lymphocyte antigen 6 complex, locus G5C (LY6G5C), mRNA
LY6G5C	BOLETH	KY500422	453	NM_025262	99.78	1	Homo sapiens lymphocyte antigen 6 complex, locus G5C (LY6G5C), mRNA
LY6G6C	00huref (PGF)	KY500423	378	NM_025261	100	0	Homo sapiens lymphocyte antigen 6 complex, locus G6C (LY6G6C), mRNA
LY6G6C	HOR	KY500424	378	BC036302	99.74	1	Homo sapiens lymphocyte antigen 6 complex, locus G6C, mRNA (cDNA clone MGC:24882 IMAGE:4776231), complete cds
LY6G6C	QBL	KY500425	378	BC036302	100	0	Homo sapiens lymphocyte antigen 6 complex, locus G6C, mRNA (cDNA clone MGC:24882 IMAGE:4776231), complete cds
LY6G6D	00huref (PGF)	KY500426	402	BC125138	100	0	Homo sapiens lymphocyte antigen 6 complex, locus G6D, mRNA (cDNA clone MGC:150334 IMAGE:40119583), complete cds
LY6G6D	IBW9	KY500427	402	BC125138	99.75	1	Homo sapiens lymphocyte antigen 6 complex, locus G6D, mRNA (cDNA clone MGC:150334 IMAGE:40119583), complete cds
LY6G6D	T7526	KY500428	402	BC125138	99.75	1	Homo sapiens lymphocyte antigen 6 complex, locus G6D, mRNA (cDNA clone MGC:150334 IMAGE:40119583), complete cds
LY6G6F	00huref (PGF)	KY500429	894	BC137213	100	0	Homo sapiens lymphocyte antigen 6 complex, locus G6F, mRNA (cDNA clone MGC:168833 IMAGE:9021210), complete cds
LY6G6F	31227ABO	KY500430	894	BC137213	99.89	1	Homo sapiens lymphocyte antigen 6 complex, locus G6F, mRNA (cDNA clone MGC:168833 IMAGE:9021210), complete cds
LY6G6F	AMA1	KY500431	894	BC137213	99.78	2	Homo sapiens lymphocyte antigen 6 complex, locus G6F, mRNA (cDNA clone MGC:168833 IMAGE:9021210), complete cds
LY6G6F	IBW9	KY500432	894	BC137213	99.89	1	Homo sapiens lymphocyte antigen 6 complex, locus G6F, mRNA (cDNA clone MGC:168833 IMAGE:9021210), complete cds
LY6G6F	QBL	KY500433	894	BC137213	99.89	1	Homo sapiens lymphocyte antigen 6 complex, locus G6F, mRNA (cDNA clone MGC:168833 IMAGE:9021210), complete cds
MAS1L	00huref (PGF)	KY500434	1137	NM_052967	100	0	Homo sapiens MAS1 proto-oncogene like, G protein-coupled receptor (MAS1L), mRNA
MAS1L	AKIBA	KY500435	1137	NM_052967	99.82	2	Homo sapiens MAS1 proto-oncogene like, G protein-coupled receptor (MAS1L), mRNA
MAS1L	HOR	KY500436	1137	NM_052967	99.82	2	Homo sapiens MAS1 proto-oncogene like, G protein-coupled receptor (MAS1L), mRNA
MAS1L	OMW	KY500437	1137	NM_052967	99.91	1	Homo sapiens MAS1 proto-oncogene like, G protein-coupled receptor (MAS1L), mRNA
MCCD1	00huref (PGF)	KY500438	360	NM_001011700	100	0	Homo sapiens mitochondrial coiled-coil domain 1 (MCCD1), mRNA
MCCD1	AKIBA	KY500439	360	NM_001011700	99.72	1	Homo sapiens mitochondrial coiled-coil domain 1 (MCCD1), mRNA
MCCD1	COX	KY500440	360	BC132996	100	0	Homo sapiens mitochondrial coiled-coil domain 1, mRNA (cDNA clone MGC:164627 IMAGE:40147018), complete cds
MCCD1	LWAGS	KY500441	360	BC132996	99.44	2	Homo sapiens mitochondrial coiled-coil domain 1, mRNA (cDNA clone MGC:164627 IMAGE:40147018), complete cds
MCCD1	MCF	KY500442	360	BC132996	99.72	1	Homo sapiens mitochondrial coiled-coil domain 1, mRNA (cDNA clone MGC:164627 IMAGE:40147018), complete cds
MCCD1	SSTO	KY500443	360	NM_001011700	99.72	1	Homo sapiens mitochondrial coiled-coil domain 1 (MCCD1), mRNA
MCCD1	TISI	KY500444	360	BC132996	99.44	2	Homo sapiens mitochondrial coiled-coil domain 1, mRNA (cDNA clone MGC:164627 IMAGE:40147018), complete cds
MDC1	00huref (PGF)	KY500445	6270	XM_005249492	100	0	PREDICTED: Homo sapiens mediator of DNA-damage checkpoint 1 (MDC1), transcript variant X4, mRNA
MDC1	AMA1	KY500446	6270	XM_005249492	99.87	8	PREDICTED: Homo sapiens mediator of DNA-damage checkpoint 1 (MDC1), transcript variant X4, mRNA
MDC1	APD	KY500447	6270	XM_005274899	100	0	PREDICTED: Homo sapiens mediator of DNA-damage checkpoint 1 (MDC1), transcript variant X4, mRNA
MDC1	DUCAF	KY500448	6270	XM_005249492	99.92	5	PREDICTED: Homo sapiens mediator of DNA-damage checkpoint 1 (MDC1), transcript variant X4, mRNA
MDC1	HOR	KY500449	6270	XM_005249492	99.79	13	PREDICTED: Homo sapiens mediator of DNA-damage checkpoint 1 (MDC1), transcript variant X4, mRNA
MDC1	JESTHOM	KY500450	6270	XM_005249492	99.98	1	PREDICTED: Homo sapiens mediator of DNA-damage checkpoint 1 (MDC1), transcript variant X4, mRNA
MDC1	LBF	KY500451	6270	XM_005249492	99.98	1	PREDICTED: Homo sapiens mediator of DNA-damage checkpoint 1 (MDC1), transcript variant X4, mRNA
MDC1	MANIKA	KY500452	6270	XM_005249492	99.76	15	PREDICTED: Homo sapiens mediator of DNA-damage checkpoint 1 (MDC1), transcript variant X4, mRNA
MDC1	MGAR	KY500453	6270	XM_005249492	99.97	2	PREDICTED: Homo sapiens mediator of DNA-damage checkpoint 1 (MDC1), transcript variant X4, mRNA
MDC1	QBL	KY500454	6270	XM_005275492	100	0	PREDICTED: Homo sapiens mediator of DNA-damage checkpoint 1 (MDC1), transcript variant X4, mRNA
MDC1	SPL	KY500455	6270	XM_005249492	99.98	1	PREDICTED: Homo sapiens mediator of DNA-damage checkpoint 1 (MDC1), transcript variant X4, mRNA
MDC1	SSTO	KY500456	6270	XM_005275629	100	0	PREDICTED: Homo sapiens mediator of DNA-damage checkpoint 1 (MDC1), transcript variant X4, mRNA
MDC1	WT49	KY500457	6270	XM_005249492	99.94	4	PREDICTED: Homo sapiens mediator of DNA-damage checkpoint 1 (MDC1), transcript variant X4, mRNA
MOG	00huref (PGF)	KY500458	612	XM_005249131	100	0	PREDICTED: Homo sapiens myelin oligodendrocyte glycoprotein (MOG), transcript variant X3, mRNA
MOG	APD	KY500459	612	XM_005274865	100	0	PREDICTED: Homo sapiens myelin oligodendrocyte glycoprotein (MOG), transcript variant X3, mRNA
MOG	BM16	KY500460	612	XM_005274865	99.82	1	PREDICTED: Homo sapiens myelin oligodendrocyte glycoprotein (MOG), transcript variant X3, mRNA
MOG	KAS116	KY500461	612	XM_005274865	99.82	1	PREDICTED: Homo sapiens myelin oligodendrocyte glycoprotein (MOG), transcript variant X3, mRNA
MOG	MCF	KY500462	612	XM_005275252	100	0	PREDICTED: Homo sapiens myelin oligodendrocyte glycoprotein (MOG), transcript variant X3, mRNA
MRPS18B	00huref (PGF)	KY500463	777	NM_014046	100	0	Homo sapiens mitochondrial ribosomal protein S18B (MRPS18B), mRNA
MRPS18B	AMA1	KY500464	777	NM_014046	99	1	Homo sapiens mitochondrial ribosomal protein S18B (MRPS18B), mRNA
MSH5	00huref (PGF)	KY500465	2505	NM_172166	100	0	Homo sapiens mutS homolog 5 (MSH5), transcript variant 4, mRNA
MSH5	AMA1	KY500466	2505	NM_002441	99.88	3	Homo sapiens mutS homolog 5 (MSH5), transcript variant 3, mRNA
MSH5	AMALA	KY500467	2505	NM_002441	99.92	2	Homo sapiens mutS homolog 5 (MSH5), transcript variant 3, mRNA
MSH5	BM09	KY500468	2505	NM_172166	99.96	1	Homo sapiens mutS homolog 5 (MSH5), transcript variant 4, mRNA
MSH5	BM14	KY500469	2505	NM_002441	99.84	4	Homo sapiens mutS homolog 5 (MSH5), transcript variant 3, mRNA
MSH5	BM21	KY500470	2505	NM_002441	99.88	3	Homo sapiens mutS homolog 5 (MSH5), transcript variant 3, mRNA
MSH5	COX	KY500471	2505	NM_002441	99.92	2	Homo sapiens mutS homolog 5 (MSH5), transcript variant 3, mRNA
MSH5	DKB	KY500472	2505	NM_172166	99.96	1	Homo sapiens mutS homolog 5 (MSH5), transcript variant 4, mRNA
MSH5	KAS116	KY500473	2505	NM_002441	99.96	1	Homo sapiens mutS homolog 5 (MSH5), transcript variant 3, mRNA
MSH5	WT49	KY500474	2505	NM_172166	99.96	1	Homo sapiens mutS homolog 5 (MSH5), transcript variant 4, mRNA
MUC21	00huref (PGF)	KY500797	1701	NM_001010909	100	0	Homo sapiens mucin 21, cell surface associated (MUC21), transcript variant 1, mRNA
MUC21	APD	KY500798	1701	AK298642	100	0	Homo sapiens cDNA FLJ56824 complete cds, weakly similar to Dentin sialophosphoprotein precursor
MUC21	COX	KY500799	1701	HM596784	100	0	Homo sapiens epiglycanin (MUC21) mRNA, complete cds
MUC21	MCF	KY500800	1701	NM_001010909	99.94	1	Homo sapiens mucin 21, cell surface associated (MUC21), transcript variant 1, mRNA
MUC21	MOU	KY500796	1791	XM_005275123	100	0	PREDICTED: Homo sapiens mucin 21, cell surface associated (MUC21), transcript variant X1, mRNA
MUC21	QBL	KY500795	1881	XM_005275406	100	0	PREDICTED: Homo sapiens mucin 21, cell surface associated (MUC21), transcript variant X1, mRNA
MUC21	TISI	KY500801	1701	HM596784	99.94	1	Homo sapiens epiglycanin (MUC21) mRNA, complete cds
MUC22	00huref (PGF)	KY500802	5322	XM_011514220	100	0	PREDICTED: Homo sapiens mucin 22 (MUC22), transcript variant X1, mRNA
MUC22	31227ABO	KY500803	3462	XM_011547999	90.05	247	PREDICTED: Homo sapiens mucin 22 (MUC22), transcript variant X1, mRNA
MUC22	AKIBA	KY500804	5322	XM_011547999	99.79	11	PREDICTED: Homo sapiens mucin 22 (MUC22), transcript variant X1, mRNA
MUC22	AMA1	KY500805	5322	XM_011548177	99.91	5	PREDICTED: Homo sapiens mucin 22 (MUC22), transcript variant X1, mRNA
MUC22	AMALA	KY500806	5322	XM_011547999	99.96	2	PREDICTED: Homo sapiens mucin 22 (MUC22), transcript variant X1, mRNA
MUC22	APD	KY500807	5322	XM_011514220	99.91	5	PREDICTED: Homo sapiens mucin 22 (MUC22), transcript variant X1, mRNA
MUC22	AWELLS	KY500808	5322	XM_011548177	99.94	3	PREDICTED: Homo sapiens mucin 22 (MUC22), transcript variant X1, mRNA
MUC22	AZH	KY500809	5322	XM_011547999	99.92	4	PREDICTED: Homo sapiens mucin 22 (MUC22), transcript variant X1, mRNA
MUC22	BEI	KY500810	5322	XM_011547165	99.91	5	PREDICTED: Homo sapiens mucin 22 (MUC22), transcript variant X1, mRNA
MUC22	BGED	KY500811	4283	XM_011547999	91.49	277	PREDICTED: Homo sapiens mucin 22 (MUC22), transcript variant X1, mRNA
MUC22	BH	KY500812	5322	XM_011548177	99.92	4	PREDICTED: Homo sapiens mucin 22 (MUC22), transcript variant X1, mRNA
MUC22	BM09	KY500813	4248	XM_011547999	97.32	86	PREDICTED: Homo sapiens mucin 22 (MUC22), transcript variant X1, mRNA
MUC22	BM14	KY500814	5319	XM_011514220	99.94	0	PREDICTED: Homo sapiens mucin 22 (MUC22), transcript variant X1, mRNA
MUC22	BM21	KY500815	5292	XM_011547582	99.14	33	PREDICTED: Homo sapiens mucin 22 (MUC22), transcript variant X1, mRNA
MUC22	BTB	KY500816	4248	XM_011547999	97.3	87	PREDICTED: Homo sapiens mucin 22 (MUC22), transcript variant X1, mRNA
MUC22	CALOGERO	KY500817	5322	XM_011547999	99.92	4	PREDICTED: Homo sapiens mucin 22 (MUC22), transcript variant X1, mRNA
MUC22	CB6B	KY500818	5322	XM_011547999	99.94	3	PREDICTED: Homo sapiens mucin 22 (MUC22), transcript variant X1, mRNA
MUC22	COX	KY500819	5322	XM_011547165	100	0	PREDICTED: Homo sapiens mucin 22 (MUC22), transcript variant X1, mRNA
MUC22	DEU	KY500820	5322	XM_011547999	99.92	4	PREDICTED: Homo sapiens mucin 22 (MUC22), transcript variant X1, mRNA
MUC22	EK	KY500821	5322	XM_011548372	99.92	4	PREDICTED: Homo sapiens mucin 22 (MUC22), transcript variant X1, mRNA
MUC22	FPAF	KY500822	5322	XM_011548372	97.3	87	PREDICTED: Homo sapiens mucin 22 (MUC22), transcript variant X1, mRNA
MUC22	HOR	KY500823	4248	XM_011547999	89.83	268	PREDICTED: Homo sapiens mucin 22 (MUC22), transcript variant X1, mRNA
MUC22	IBW9	KY500824	3462	XM_011547165	99.91	5	PREDICTED: Homo sapiens mucin 22 (MUC22), transcript variant X1, mRNA
MUC22	JBUSH	KY500825	5322	XM_011547582	99.18	31	PREDICTED: Homo sapiens mucin 22 (MUC22), transcript variant X1, mRNA
MUC22	KAS011	KY500826	5292	XM_011547165	99.92	4	PREDICTED: Homo sapiens mucin 22 (MUC22), transcript variant X1, mRNA
MUC22	KAS116	KY500827	5322	XM_011546274	99.16	32	PREDICTED: Homo sapiens mucin 22 (MUC22), transcript variant X1, mRNA
MUC22	KGU	KY500828	5292	XM_011547999	97.27	88	PREDICTED: Homo sapiens mucin 22 (MUC22), transcript variant X1, mRNA
MUC22	LKT3	KY500829	4248	XM_011514220	99.89	3	PREDICTED: Homo sapiens mucin 22 (MUC22), transcript variant X1, mRNA
MUC22	MANIKA	KY500830	5319	XM_011547999	99.94	3	PREDICTED: Homo sapiens mucin 22 (MUC22), transcript variant X1, mRNA
MUC22	MCF	KY500831	5322	XM_011547999	100	0	PREDICTED: Homo sapiens mucin 22 (MUC22), transcript variant X1, mRNA
MUC22	MOU	KY500832	5322	XM_011547999	99.94	3	PREDICTED: Homo sapiens mucin 22 (MUC22), transcript variant X1, mRNA
MUC22	PLH	KY500833	5322	XM_011547165	99.92	4	PREDICTED: Homo sapiens mucin 22 (MUC22), transcript variant X1, mRNA
MUC22	QBL	KY500834	5322	XM_011548177	100	0	PREDICTED: Homo sapiens mucin 22 (MUC22), transcript variant X1, mRNA
MUC22	RML	KY500835	4128	XM_011547582	89.81	268	PREDICTED: Homo sapiens mucin 22 (MUC22), transcript variant X1, mRNA
MUC22	RSH	KY500836	5321	XM_011547165	99.83	8	PREDICTED: Homo sapiens mucin 22 (MUC22), transcript variant X1, mRNA
MUC22	SA1	KY500837	5322	XM_011514220	99.96	2	PREDICTED: Homo sapiens mucin 22 (MUC22), transcript variant X1, mRNA
MUC22	SPL	KY500838	5322	XM_011548372	99.79	11	PREDICTED: Homo sapiens mucin 22 (MUC22), transcript variant X1, mRNA
MUC22	SSTO	KY500839	5322	XM_011548372	100	0	PREDICTED: Homo sapiens mucin 22 (MUC22), transcript variant X1, mRNA
MUC22	TISI	KY500840	5322	XM_011547165	99.85	8	PREDICTED: Homo sapiens mucin 22 (MUC22), transcript variant X1, mRNA
MUC22	WJR076D	KY500841	5292	XM_011547582	99.18	31	PREDICTED: Homo sapiens mucin 22 (MUC22), transcript variant X1, mRNA
MUC22	WT24	KY500842	5322	XM_011548177	99.96	2	PREDICTED: Homo sapiens mucin 22 (MUC22), transcript variant X1, mRNA
MUC22	WT49	KY500843	5352	XM_011548372	99.27	9	PREDICTED: Homo sapiens mucin 22 (MUC22), transcript variant X1, mRNA
MUC22	WT51	KY500844	5322	XM_011548177	99.92	4	PREDICTED: Homo sapiens mucin 22 (MUC22), transcript variant X1, mRNA
NCR3	00huref (PGF)	KY500475	534	NM_001145466	100	0	Homo sapiens natural cytotoxicity triggering receptor 3 (NCR3), transcript variant 2, mRNA
NCR3	AKIBA	KY500476	534	NM_001145466	99.81	1	Homo sapiens natural cytotoxicity triggering receptor 3 (NCR3), transcript variant 2, mRNA
NCR3	JHAF	KY500477	534	NM_001145466	99.81	1	Homo sapiens natural cytotoxicity triggering receptor 3 (NCR3), transcript variant 2, mRNA
NCR3	OMW	KY500478	534	NM_001145466	99.81	1	Homo sapiens natural cytotoxicity triggering receptor 3 (NCR3), transcript variant 2, mRNA
NELFE	00huref (PGF)	KY500479	1143	AK302652	100	0	Homo sapiens cDNA FLJ56180 complete cds, highly similar to Negative elongation factor E
NELFE	RSH	KY500480	1143	AK302652	99.91	1	Homo sapiens cDNA FLJ56180 complete cds, highly similar to Negative elongation factor E
NEU1	00huref (PGF)	KY500481	1248	NM_001132271	100	0	Pongo abelii sialidase 1 (lysosomal sialidase) (NEU1), transcript variant 1, mRNA
NEU1	RSH	KY500482	1248	NM_001132271	99.92	1	Pongo abelii sialidase 1 (lysosomal sialidase) (NEU1), transcript variant 1, mRNA
NFKBIL1	00huref (PGF)	KY500483	1101	NM_001144961	100	0	Homo sapiens nuclear factor of kappa light polypeptide gene enhancer in B-cells inhibitor-like 1 (NFKBIL1), transcript variant 2, mRNA
NFKBIL1	APD	KY500484	1101	BC143671	100	0	Homo sapiens nuclear factor of kappa light polypeptide gene enhancer in B-cells inhibitor-like 1, mRNA (cDNA clone MGC:177202 IMAGE:9052185), complete cds
NFKBIL1	MCF	KY500485	1101	BC143671	99.91	1	Homo sapiens nuclear factor of kappa light polypeptide gene enhancer in B-cells inhibitor-like 1, mRNA (cDNA clone MGC:177202 IMAGE:9052185), complete cds
NFKBIL1	SLE005	KY500486	1101	BC143671	99.91	1	Homo sapiens nuclear factor of kappa light polypeptide gene enhancer in B-cells inhibitor-like 1, mRNA (cDNA clone MGC:177202 IMAGE:9052185), complete cds
NOTCH4	00huref (PGF)	KY500845	6012	NM_004557	100	0	Homo sapiens notch 4 (NOTCH4), mRNA
NOTCH4	31227ABO	KY500846	6009	BC140782	99.98	1	Homo sapiens Notch homolog 4 (Drosophila), mRNA (cDNA clone MGC:176459 IMAGE:9021650), complete cds
NOTCH4	AKIBA	KY500847	6012	NM_004557	99.95	3	Homo sapiens notch 4 (NOTCH4), mRNA
NOTCH4	AMA1	KY500848	6015	BC140782	99.95	0	Homo sapiens Notch homolog 4 (Drosophila), mRNA (cDNA clone MGC:176459 IMAGE:9021650), complete cds
NOTCH4	APD	KY500849	6015	NM_004557	99.83	7	Homo sapiens notch 4 (NOTCH4), mRNA
NOTCH4	AZH	KY500850	6012	NM_004557	99.87	8	Homo sapiens notch 4 (NOTCH4), mRNA
NOTCH4	BER	KY500851	6021	NM_004557	99.9	6	Homo sapiens notch 4 (NOTCH4), mRNA
NOTCH4	BM15	KY500852	6009	BC140782	99.95	3	Homo sapiens Notch homolog 4 (Drosophila), mRNA (cDNA clone MGC:176459 IMAGE:9021650), complete cds
NOTCH4	BM16	KY500853	6000	BC140782	99.88	7	Homo sapiens Notch homolog 4 (Drosophila), mRNA (cDNA clone MGC:176459 IMAGE:9021650), complete cds
NOTCH4	CALOGERO	KY500854	6009	BC140782	99.98	1	Homo sapiens Notch homolog 4 (Drosophila), mRNA (cDNA clone MGC:176459 IMAGE:9021650), complete cds
NOTCH4	COX	KY500855	6018	NM_004557	99.92	5	Homo sapiens notch 4 (NOTCH4), mRNA
NOTCH4	DBB	KY500856	6009	BC140782	99.8	12	Homo sapiens Notch homolog 4 (Drosophila), mRNA (cDNA clone MGC:176459 IMAGE:9021650), complete cds
NOTCH4	DEU	KY500857	6012	NM_004557	99.97	2	Homo sapiens notch 4 (NOTCH4), mRNA
NOTCH4	EK	KY500858	6009	BC140782	99.9	6	Homo sapiens Notch homolog 4 (Drosophila), mRNA (cDNA clone MGC:176459 IMAGE:9021650), complete cds
NOTCH4	HOR	KY500859	6009	BC140782	99.83	10	Homo sapiens Notch homolog 4 (Drosophila), mRNA (cDNA clone MGC:176459 IMAGE:9021650), complete cds
NOTCH4	IBW9	KY500860	6009	BC140782	99.85	9	Homo sapiens Notch homolog 4 (Drosophila), mRNA (cDNA clone MGC:176459 IMAGE:9021650), complete cds
NOTCH4	JESTHOM	KY500861	6009	BC140782	99.88	7	Homo sapiens Notch homolog 4 (Drosophila), mRNA (cDNA clone MGC:176459 IMAGE:9021650), complete cds
NOTCH4	KGU	KY500862	6012	NM_004557	99.97	2	Homo sapiens notch 4 (NOTCH4), mRNA
NOTCH4	LKT3	KY500863	6012	NM_004557	99.82	11	Homo sapiens notch 4 (NOTCH4), mRNA
NOTCH4	LWAGS	KY500864	6000	BC140782	99.93	4	Homo sapiens Notch homolog 4 (Drosophila), mRNA (cDNA clone MGC:176459 IMAGE:9021650), complete cds
NOTCH4	MADURA	KY500865	6000	BC140782	99.98	1	Homo sapiens Notch homolog 4 (Drosophila), mRNA (cDNA clone MGC:176459 IMAGE:9021650), complete cds
NOTCH4	MCF	KY500866	6012	NM_004557	99.93	4	Homo sapiens notch 4 (NOTCH4), mRNA
NOTCH4	MOU	KY500867	6009	BC140782	99.93	4	Homo sapiens Notch homolog 4 (Drosophila), mRNA (cDNA clone MGC:176459 IMAGE:9021650), complete cds
NOTCH4	OMW	KY500868	6009	BC140782	99.93	4	Homo sapiens Notch homolog 4 (Drosophila), mRNA (cDNA clone MGC:176459 IMAGE:9021650), complete cds
NOTCH4	PLH	KY500869	6018	NM_004557	99.97	2	Homo sapiens notch 4 (NOTCH4), mRNA
NOTCH4	QBL	KY500870	6012	NM_004557	99.95	3	Homo sapiens notch 4 (NOTCH4), mRNA
NOTCH4	RSH	KY500871	6009	BC140782	99.97	2	Homo sapiens Notch homolog 4 (Drosophila), mRNA (cDNA clone MGC:176459 IMAGE:9021650), complete cds
NOTCH4	SSTO	KY500872	6012	NM_004557	99.98	1	Homo sapiens notch 4 (NOTCH4), mRNA
NOTCH4	SWEIG	KY500873	6012	NM_004557	99.88	7	Homo sapiens notch 4 (NOTCH4), mRNA
NOTCH4	TAB	KY500874	6015	NM_004557	99.9	3	Homo sapiens notch 4 (NOTCH4), mRNA
NOTCH4	WDV	KY500875	6009	BC140782	99.93	4	Homo sapiens Notch homolog 4 (Drosophila), mRNA (cDNA clone MGC:176459 IMAGE:9021650), complete cds
NOTCH4	WJR076D	KY500876	6000	BC140782	99.87	8	Homo sapiens Notch homolog 4 (Drosophila), mRNA (cDNA clone MGC:176459 IMAGE:9021650), complete cds
NOTCH4	WT49	KY500877	6012	NM_004557	99.85	9	Homo sapiens notch 4 (NOTCH4), mRNA
NOTCH4	WT51	KY500878	6009	BC140782	100	0	Homo sapiens Notch homolog 4 (Drosophila), mRNA (cDNA clone MGC:176459 IMAGE:9021650), complete cds
NRM	00huref (PGF)	KY500487	789	NM_007243	100	0	Homo sapiens nurim (nuclear envelope membrane protein) (NRM), transcript variant 1, mRNA
NRM	DUCAF	KY500488	789	NM_007243	99.87	1	Homo sapiens nurim (nuclear envelope membrane protein) (NRM), transcript variant 1, mRNA
OR10C1	00huref (PGF)	KY500520	939	NM_013941	100	0	Homo sapiens olfactory receptor, family 10, subfamily C, member 1 (gene/pseudogene) (OR10C1), mRNA
OR10C1	AKIBA	KY500521	939	NM_013941	99.15	8	Homo sapiens olfactory receptor, family 10, subfamily C, member 1 (gene/pseudogene) (OR10C1), mRNA
OR10C1	APD	KY500522	939	BK004207	100	0	TPA_inf: Homo sapiens olfactory receptor OR6-31 gene, complete cds
OR10C1	DEU	KY500523	939	BK004207	99.89	1	TPA_inf: Homo sapiens olfactory receptor OR6-31 gene, complete cds
OR10C1	OMW	KY500524	939	BK004207	99.15	8	TPA_inf: Homo sapiens olfactory receptor OR6-31 gene, complete cds
OR10C1	SSTO	KY500525	939	BX248400	100	0	Human DNA sequence from clone DASS-235A23 on chromosome 6, complete sequence
OR11A1	00huref (PGF)	KY500526	948	NM_013937	100	0	Homo sapiens olfactory receptor, family 11, subfamily A, member 1 (OR11A1), mRNA
OR11A1	AKIBA	KY500527	948	NM_013937	99.68	3	Homo sapiens olfactory receptor, family 11, subfamily A, member 1 (OR11A1), mRNA
OR11A1	SSTO	KY500528	948	BX248400	100	0	Human DNA sequence from clone DASS-235A23 on chromosome 6, complete sequence
OR12D2	00huref (PGF)	KY500529	924	NM_013936	100	0	Homo sapiens olfactory receptor, family 12, subfamily D, member 2 (gene/pseudogene) (OR12D2), mRNA
OR12D2	AMALA	KY500530	924	BX005133	99.89	1	Human DNA sequence from clone DASS-103C7 on chromosome 6, complete sequence
OR12D2	APD	KY500531	924	BC101742	100	0	Homo sapiens olfactory receptor, family 12, subfamily D, member 2, mRNA (cDNA clone MGC:126791 IMAGE:8069248), complete cds
OR12D2	DBB	KY500532	924	CR388393	100	0	Human DNA sequence from clone DADB-136A24 on chromosome 6, complete sequence
OR12D2	SSTO	KY500533	924	BX005133	100	0	Human DNA sequence from clone DASS-103C7 on chromosome 6, complete sequence
OR12D3	00huref (PGF)	KY500534	951	BK004439	100	0	TPA_inf: Homo sapiens olfactory receptor OR6-27 gene, complete cds
OR12D3	AKIBA	KY500535	951	BK004439	99.89	1	TPA_inf: Homo sapiens olfactory receptor OR6-27 gene, complete cds
OR12D3	APD	KY500536	951	BC106898	100	0	Homo sapiens cDNA clone IMAGE:40031314
OR12D3	COX	KY500537	951	AL732432	100	0	Human DNA sequence from clone CH502-92J3 on chromosome 6, complete sequence
OR12D3	MCF	KY500538	951	CR759808	100	0	Human DNA sequence from clone DAMC-143C14 on chromosome 6, complete sequence
OR12D3	TEM	KY500539	951	BK004439	99.89	1	TPA_inf: Homo sapiens olfactory receptor OR6-27 gene, complete cds
OR14J1	00huref (PGF)	KY500540	966	BC136905	100	0	Homo sapiens olfactory receptor, family 14, subfamily J, member 1, mRNA (cDNA clone MGC:168519 IMAGE:9020896), complete cds
OR14J1	APD	KY500541	966	BX927232	100	0	Human DNA sequence from clone DAMA-334F21 on chromosome 6, complete sequence
OR14J1	EK	KY500542	966	BX927232	99.9	1	Human DNA sequence from clone DAMA-334F21 on chromosome 6, complete sequence
OR14J1	IBW9	KY500543	966	BC136905	99.9	1	Homo sapiens olfactory receptor, family 14, subfamily J, member 1, mRNA (cDNA clone MGC:168519 IMAGE:9020896), complete cds
OR2B3	00huref (PGF)		942	NM_001005226	100	0	Homo sapiens olfactory receptor, family 2, subfamily B, member 3 (OR2B3), mRNA
OR2H1	00huref (PGF)	KY500489	951	XM_011514470	100	0	PREDICTED: Homo sapiens olfactory receptor, family 2, subfamily H, member 1 (OR2H1), transcript variant X12, mRNA
OR2H1	AKIBA	KY500490	951	AJ302612	100	0	Homo sapiens 6M1-16*03 gene for olfactory receptor, cell line BM19.7
OR2H1	OMW	KY500491	951	AJ302612	99.89	1	Homo sapiens 6M1-16*03 gene for olfactory receptor, cell line BM19.7
OR2H2	00huref (PGF)	KY500492	939	XM_011514911	100	0	PREDICTED: Homo sapiens olfactory receptor, family 2, subfamily H, member 2 (OR2H2), transcript variant X11, mRNA
OR2H2	AKIBA	KY500493	939	XR_952854	99.68	3	PREDICTED: Homo sapiens olfactory receptor, family 2, subfamily H, member 2 (OR2H2), transcript variant X11, misc_RNA
OR2H2	APD	KY500494	939	XR_952854	100	0	PREDICTED: Homo sapiens olfactory receptor, family 2, subfamily H, member 2 (OR2H2), transcript variant X11, misc_RNA
OR2H2	BTB	KY500495	939	BC112176	100	0	Homo sapiens olfactory receptor, family 2, subfamily H, member 2, mRNA (cDNA clone MGC:138381 IMAGE:8327644), complete cds
OR2H2	COX	KY500496	939	XR_952214	100	0	PREDICTED: Homo sapiens olfactory receptor, family 2, subfamily H, member 2 (OR2H2), transcript variant X11, misc_RNA
OR2H2	DUCAF	KY500497	939	XR_952214	99.89	1	PREDICTED: Homo sapiens olfactory receptor, family 2, subfamily H, member 2 (OR2H2), transcript variant X11, misc_RNA
OR2H2	ISH3	KY500498	939	BC112176	99.79	2	Homo sapiens olfactory receptor, family 2, subfamily H, member 2, mRNA (cDNA clone MGC:138381 IMAGE:8327644), complete cds
OR2H2	KAWASAKI	KY500499	939	XR_952854	99.89	1	PREDICTED: Homo sapiens olfactory receptor, family 2, subfamily H, member 2 (OR2H2), transcript variant X11, misc_RNA
OR2J2	00huref (PGF)	KY500500	939	NM_030905	100	0	Homo sapiens olfactory receptor, family 2, subfamily J, member 2 (OR2J2), mRNA
OR2J2	AKIBA	KY500501	939	BC108898	99.89	1	Homo sapiens olfactory receptor, family 2, subfamily J, member 2, mRNA (cDNA clone MGC:119136 IMAGE:40003956), complete cds
OR2J2	APD	KY500502	939	CR388415	100	0	Human DNA sequence from clone DADB-150K7 on chromosome 6, complete sequence
OR2J2	BM15	KY500503	939	CR388415	99.79	2	Human DNA sequence from clone DADB-150K7 on chromosome 6, complete sequence
OR2J2	BM21	KY500504	939	BC108898	100	0	Homo sapiens olfactory receptor, family 2, subfamily J, member 2, mRNA (cDNA clone MGC:119136 IMAGE:40003956), complete cds
OR2J2	COX	KY500505	939	CR759834	100	0	Human DNA sequence from clone DAMC-220I8 on chromosome 6, complete sequence
OR2J3	00huref (PGF)	KY500506	936	NM_001005216	100	0	Homo sapiens olfactory receptor, family 2, subfamily J, member 3 (OR2J3), mRNA
OR2J3	AMA1	KY500507	936	AJ302558	100	0	Homo sapiens 6M1-3*04 gene for olfactory receptor, cell line AMAI
OR2J3	APD	KY500508	936	BC136973	100	0	Homo sapiens olfactory receptor, family 2, subfamily J, member 3, mRNA (cDNA clone MGC:168588 IMAGE:9020965), complete cds
OR2J3	FPAF	KY500509	936	AJ302552	100	0	Homo sapiens 6M1-3*02 gene for olfactory receptor, cell line BM28.7 olfactory receptor
OR2J3	MCF	KY500510	936	BC136973	99.89	1	Homo sapiens olfactory receptor, family 2, subfamily J, member 3, mRNA (cDNA clone MGC:168588 IMAGE:9020965), complete cds
OR2W1	00huref (PGF)	KY500511	963	BX927167	100	0	Human DNA sequence from clone DAMA-52D19 on chromosome 6, complete sequence
OR2W1	AKIBA	KY500512	963	AJ302602	100	0	Homo sapiens 6M1-15*02 gene for olfactory receptor, cell line WT51
OR2W1	AMA1	KY500513	963	AJ302603	100	0	Homo sapiens 6M1-15*03 gene for olfactory receptor, cell line AMAI
OR5V1	00huref (PGF)	KY500514	966	XM_011514929	100	0	PREDICTED: Homo sapiens olfactory receptor, family 5, subfamily V, member 1 (OR5V1), transcript variant X1, mRNA
OR5V1	AMA1	KY500515	966	XM_011547322	99.79	2	PREDICTED: Homo sapiens olfactory receptor, family 5, subfamily V, member 1 (OR5V1), transcript variant X1, mRNA
OR5V1	APD	KY500516	966	XM_011547322	100	0	PREDICTED: Homo sapiens olfactory receptor, family 5, subfamily V, member 1 (OR5V1), transcript variant X1, mRNA
OR5V1	KAWASAKI	KY500517	966	XM_011548494	100	0	PREDICTED: Homo sapiens olfactory receptor, family 5, subfamily V, member 1 (OR5V1), transcript variant X1, mRNA
OR5V1	MCF	KY500518	966	XM_011548109	100	0	PREDICTED: Homo sapiens olfactory receptor, family 5, subfamily V, member 1 (OR5V1), transcript variant X1, mRNA
OR5V1	MOU	KY500519	966	XM_011547938	100	0	PREDICTED: Homo sapiens olfactory receptor, family 5, subfamily V, member 1 (OR5V1), transcript variant X1, mRNA
PBX2	00huref (PGF)	KY500544	1293	NM_002586	100	0	Homo sapiens pre-B-cell leukemia homeobox 2 (PBX2), mRNA
PBX2	BTB	KY500545	1293	NM_002586	100	0	Homo sapiens pre-B-cell leukemia homeobox 2 (PBX2), mRNA
PBX2	EK	KY500546	1293	NM_002586	99.92	1	Homo sapiens pre-B-cell leukemia homeobox 2 (PBX2), mRNA
PBX2	IBW9	KY500547	1293	NM_002586	99.77	3	Homo sapiens pre-B-cell leukemia homeobox 2 (PBX2), mRNA
PBX2	KRC005	KY500548	1293	NM_002586	99.92	1	Homo sapiens pre-B-cell leukemia homeobox 2 (PBX2), mRNA
PBX2	QBL	KY500549	1293	NM_002586	99.92	1	Homo sapiens pre-B-cell leukemia homeobox 2 (PBX2), mRNA
PFDN6	00huref (PGF)		390	NM_001185181	100	0	Homo sapiens prefoldin subunit 6 (PFDN6), transcript variant 1, mRNA
PHF1	00huref (APD)	KY500550	1374	NM_002636	100	0	Homo sapiens PHD finger protein 1 (PHF1), transcript variant 1, mRNA
PHF1	PGF	KY500551	1374	NM_002636	99.93	1	Homo sapiens PHD finger protein 1 (PHF1), transcript variant 1, mRNA
POU5F1	00huref (PGF)	KY500552	1083	NM_002701.5	100	0	Homo sapiens POU class 5 homeobox 1 (POU5F1), transcript variant 1, mRNA
POU5F1	APD	KY500553	1083	GU480811.1	100	0	Homo sapiens isolate NT2-4 POU domain transcription factor OCT4 (POU5F1) mRNA, complete cds
POU5F1	BER	KY500554	1083	GU480811.1	99.908	0	Homo sapiens isolate NT2-4 POU domain transcription factor OCT4 (POU5F1) mRNA, complete cds
POU5F1	BM09	KY500555	1083	NM_002701.5	99.908	0	Homo sapiens POU class 5 homeobox 1 (POU5F1), transcript variant 1, mRNA
POU5F1	BM21	KY500556	1083	GU480830.1	99.908	0	Homo sapiens isolate NT2-23 POU domain transcription factor OCT4 (POU5F1) mRNA, complete cds
POU5F1	ISH3	KY500557	1083	NM_002701.5	99.723	0	Homo sapiens POU class 5 homeobox 1 (POU5F1), transcript variant 1, mRNA
POU5F1	MCF	KY500558	1083	BC117437.1	100	0	Homo sapiens POU class 5 homeobox 1, mRNA (cDNA clone MGC:151046 IMAGE:40125988), complete cds
POU5F1	QBL	KY500559	1083	GU480830.1	100	0	Homo sapiens isolate NT2-23 POU domain transcription factor OCT4 (POU5F1) mRNA, complete cds
POU5F1	RML	KY500560	1083	GU480830.1	99.815	0	Homo sapiens isolate NT2-23 POU domain transcription factor OCT4 (POU5F1) mRNA, complete cds
PPP1R10	00huref (PGF)	KY500561	2823	XM_011514722	100	0	PREDICTED: Homo sapiens protein phosphatase 1, regulatory subunit 10 (PPP1R10), transcript variant X2, mRNA
PPP1R10	AKIBA	KY500562	2823	XM_011514722	99.96	1	PREDICTED: Homo sapiens protein phosphatase 1, regulatory subunit 10 (PPP1R10), transcript variant X2, mRNA
PPP1R10	DUCAF	KY500563	2823	XM_011514722	99.96	1	PREDICTED: Homo sapiens protein phosphatase 1, regulatory subunit 10 (PPP1R10), transcript variant X2, mRNA
PPP1R10	EJ32B	KY500564	2823	XM_011514722	99.93	2	PREDICTED: Homo sapiens protein phosphatase 1, regulatory subunit 10 (PPP1R10), transcript variant X2, mRNA
PPP1R10	HOR	KY500565	2823	XM_011514722	99.96	1	PREDICTED: Homo sapiens protein phosphatase 1, regulatory subunit 10 (PPP1R10), transcript variant X2, mRNA
PPP1R10	TISI	KY500566	2823	XM_011514722	99.96	1	PREDICTED: Homo sapiens protein phosphatase 1, regulatory subunit 10 (PPP1R10), transcript variant X2, mRNA
PPP1R10	WT49	KY500567	2823	XM_011514722	99.96	1	PREDICTED: Homo sapiens protein phosphatase 1, regulatory subunit 10 (PPP1R10), transcript variant X2, mRNA
PPP1R11	00huref (PGF)	KY500568	381	NM_021959	100	0	Homo sapiens protein phosphatase 1, regulatory (inhibitor) subunit 11 (PPP1R11), mRNA
PPP1R11	QBL	KY500569	381	XM_009450866	100	0	PREDICTED: Pan troglodytes protein phosphatase 1, regulatory (inhibitor) subunit 11 (PPP1R11), transcript variant X1, mRNA
PPP1R18	00huref (PGF)	KY500570	1842	NM_001134870	100	0	Homo sapiens protein phosphatase 1, regulatory subunit 18 (PPP1R18), transcript variant 2, mRNA
PPP1R18	BM21	KY500571	1842	NM_001134870	99.84	1	Homo sapiens protein phosphatase 1, regulatory subunit 18 (PPP1R18), transcript variant 2, mRNA
PPP1R18	COX	KY500572	1842	NM_001134870	99.84	1	Homo sapiens protein phosphatase 1, regulatory subunit 18 (PPP1R18), transcript variant 2, mRNA
PPP1R18	DUCAF	KY500573	1842	NM_001134870	99.84	1	Homo sapiens protein phosphatase 1, regulatory subunit 18 (PPP1R18), transcript variant 2, mRNA
PPP1R18	L0541265	KY500574	1842	NM_001134870	99.78	2	Homo sapiens protein phosphatase 1, regulatory subunit 18 (PPP1R18), transcript variant 2, mRNA
PPP1R18	LWAGS	KY500575	1842	NM_001134870	99.84	1	Homo sapiens protein phosphatase 1, regulatory subunit 18 (PPP1R18), transcript variant 2, mRNA
PPP1R18	MCF	KY500576	1842	NM_001134870	99.84	1	Homo sapiens protein phosphatase 1, regulatory subunit 18 (PPP1R18), transcript variant 2, mRNA
PPP1R18	QBL	KY500577	1842	NM_001134870	99.84	1	Homo sapiens protein phosphatase 1, regulatory subunit 18 (PPP1R18), transcript variant 2, mRNA
PPP1R18	SSTO	KY500578	1842	NM_001134870	99.84	1	Homo sapiens protein phosphatase 1, regulatory subunit 18 (PPP1R18), transcript variant 2, mRNA
PPT2	00huref (PGF)	KY500579	909	NM_001204103	100	0	Homo sapiens palmitoyl-protein thioesterase 2 (PPT2), transcript variant 3, mRNA
PPT2	APD	KY500580	909	BC001355	100	0	Homo sapiens palmitoyl-protein thioesterase 2, mRNA (cDNA clone MGC:1313 IMAGE:3050231), complete cds
PPT2	COX	KY500581	909	NM_001204103	99	2	Homo sapiens palmitoyl-protein thioesterase 2 (PPT2), transcript variant 3, mRNA
PRR3	00huref (PGF)	KY500582	567	NM_025263	100	0	Homo sapiens proline rich 3 (PRR3), transcript variant 1, mRNA
PRR3	AMA1	KY500583	567	BC126457	100	0	Homo sapiens proline rich 3, mRNA (cDNA clone MGC:161735 IMAGE:8992173), complete cds
PRR3	APD	KY500584	567	AK298621	100	0	Homo sapiens cDNA FLJ60784 complete cds, highly similar to Proline-rich protein 3
PRRC2A	00huref (PGF)	KY500879	6474	NM_004638	100	0	Homo sapiens proline-rich coiled-coil 2A (PRRC2A), transcript variant 2, mRNA
PRRC2A	AKIBA	KY500880	6474	BC060668	99.98	1	Homo sapiens HLA-B associated transcript 2, mRNA (cDNA clone MGC:57530 IMAGE:6471026), complete cds
PRRC2A	AMA1	KY500881	6474	XM_011547690	99.94	4	PREDICTED: Homo sapiens proline-rich coiled-coil 2A (PRRC2A), transcript variant X2, mRNA
PRRC2A	BEI	KY500882	6474	XM_011547690	100	0	PREDICTED: Homo sapiens proline-rich coiled-coil 2A (PRRC2A), transcript variant X2, mRNA
PRRC2A	BER	KY500883	6474	XM_011548463	99.95	0	PREDICTED: Homo sapiens proline-rich coiled-coil 2A (PRRC2A), transcript variant X8, mRNA
PRRC2A	BM09	KY500884	6474	XM_011547690	99.78	2	PREDICTED: Homo sapiens proline-rich coiled-coil 2A (PRRC2A), transcript variant X2, mRNA
PRRC2A	BM15	KY500885	6474	NM_004638	99.97	2	Homo sapiens proline-rich coiled-coil 2A (PRRC2A), transcript variant 2, mRNA
PRRC2A	E481324	KY500886	6474	BC060668	99.97	2	Homo sapiens HLA-B associated transcript 2, mRNA (cDNA clone MGC:57530 IMAGE:6471026), complete cds
PRRC2A	EK	KY500887	6474	NM_004638	99.94	4	Homo sapiens proline-rich coiled-coil 2A (PRRC2A), transcript variant 2, mRNA
PRRC2A	LKT3	KY500888	6474	BC060668	99.95	3	Homo sapiens HLA-B associated transcript 2, mRNA (cDNA clone MGC:57530 IMAGE:6471026), complete cds
PRRC2A	RSH	KY500889	6462	XM_011547690	99.97	2	PREDICTED: Homo sapiens proline-rich coiled-coil 2A (PRRC2A), transcript variant X2, mRNA
PRRC2A	SA1	KY500890	6462	BC060668	99.97	2	Homo sapiens HLA-B associated transcript 2, mRNA (cDNA clone MGC:57530 IMAGE:6471026), complete cds
PRRC2A	SLE005	KY500891	6474	XM_011548463	99.94	1	PREDICTED: Homo sapiens proline-rich coiled-coil 2A (PRRC2A), transcript variant X8, mRNA
PRRC2A	SPL	KY500892	6474	XM_011547690	99.77	3	PREDICTED: Homo sapiens proline-rich coiled-coil 2A (PRRC2A), transcript variant X2, mRNA
PRRT1	00huref (PGF)	KY500585	921	NM_030651	100	0	Homo sapiens proline-rich transmembrane protein 1 (PRRT1), mRNA
PRRT1	31227ABO	KY500586	921	NM_030651	99.89	1	Homo sapiens proline-rich transmembrane protein 1 (PRRT1), mRNA
PSMB8	00huref (PGF)		819	BC001114	100	0	Homo sapiens proteasome (prosome, macropain) subunit, beta type, 8 (large multifunctional peptidase 7), mRNA (cDNA clone MGC:1491 IMAGE:2967119), complete cds
PSMB9	00huref (PGF)	KY500587	660	BT019722	100	0	Synthetic construct Homo sapiens proteasome (prosome, macropain) subunit, beta type, 9 (large multifunctional protease 2) mRNA, partial cds
PSMB9	APD	KY500588	660	X62741	99.85	1	H.sapiens RING12 mRNA
PSMB9	AWELLS	KY500589	660	BC065513	99.85	1	Homo sapiens proteasome (prosome, macropain) subunit, beta type, 9 (large multifunctional peptidase 2), mRNA (cDNA clone MGC:70470 IMAGE:5749985), complete cds
PSMB9	BER	KY500590	660	BC065513	99.85	1	Homo sapiens proteasome (prosome, macropain) subunit, beta type, 9 (large multifunctional peptidase 2), mRNA (cDNA clone MGC:70470 IMAGE:5749985), complete cds
PSMB9	PITOUT	KY500591	660	BT019722.1	100	0	Synthetic construct Homo sapiens proteasome (prosome, macropain) subunit, beta type, 9 (large multifunctional protease 2) mRNA, partial cds
PSORS1C1	00huref (PGF)	KY500893	459	NM_014068	100	0	Homo sapiens psoriasis susceptibility 1 candidate 1 (PSORS1C1), mRNA
PSORS1C1	AKIBA	KY500894	458	NM_014068	99.57	1	Homo sapiens psoriasis susceptibility 1 candidate 1 (PSORS1C1), mRNA
PSORS1C1	AWELLS	KY500895	460	NM_014068	99.78	1	Homo sapiens psoriasis susceptibility 1 candidate 1 (PSORS1C1), mRNA
PSORS1C1	BM09	KY500896	459	NM_014068	99.57	1	Homo sapiens psoriasis susceptibility 1 candidate 1 (PSORS1C1), mRNA
PSORS1C1	HOR	KY500897	460	NM_014068	99.78	1	Homo sapiens psoriasis susceptibility 1 candidate 1 (PSORS1C1), mRNA
PSORS1C1	LUY	KY500898	459	NM_014068	99.78	1	Homo sapiens psoriasis susceptibility 1 candidate 1 (PSORS1C1), mRNA
PSORS1C1	MCF	KY500899	459	AB031479	100	0	Homo sapiens SEEK1 mRNA, complete cds
PSORS1C1	QBL	KY500900	459	NM_014068	99.35	2	Homo sapiens psoriasis susceptibility 1 candidate 1 (PSORS1C1), mRNA
PSORS1C2	00huref (PGF)	KY500901	411	NM_014069	100	0	Homo sapiens psoriasis susceptibility 1 candidate 2 (PSORS1C2), mRNA
PSORS1C2	APD	KY500902	411	AF484420	100	0	Homo sapiens psoriasis susceptibility 1 candidate 2 (PSORS1C2) mRNA, complete cds
PSORS1C2	RML	KY500903	410	NM_014069	99.76	1	Homo sapiens psoriasis susceptibility 1 candidate 2 (PSORS1C2), mRNA
PSORS1C2	SSTO	KY500904	411	AF484420	99.76	0	Homo sapiens psoriasis susceptibility 1 candidate 2 (PSORS1C2) mRNA, complete cds
RGL2	00huref (PGF)	KY500592	2334	NM_004761	100	0	Homo sapiens ral guanine nucleotide dissociation stimulator-like 2 (RGL2), transcript variant 1, mRNA
RGL2	AMA1	KY500593	2334	NM_004761	99.96	1	Homo sapiens ral guanine nucleotide dissociation stimulator-like 2 (RGL2), transcript variant 1, mRNA
RGL2	BM15	KY500594	2334	NM_004761	99.96	1	Homo sapiens ral guanine nucleotide dissociation stimulator-like 2 (RGL2), transcript variant 1, mRNA
RGL2	CB6B	KY500595	2334	NM_004761	99.96	1	Homo sapiens ral guanine nucleotide dissociation stimulator-like 2 (RGL2), transcript variant 1, mRNA
RGL2	RML	KY500596	2334	NM_004761	99.96	1	Homo sapiens ral guanine nucleotide dissociation stimulator-like 2 (RGL2), transcript variant 1, mRNA
RING1	00huref (PGF)	KY500600	1221	BC051866	100	0	Homo sapiens ring finger protein 1, mRNA (cDNA clone MGC:60237 IMAGE:6142438), complete cds
RING1	AMALA	KY500597	1221	BC051866	99.84	2	Homo sapiens ring finger protein 1, mRNA (cDNA clone MGC:60237 IMAGE:6142438), complete cds
RING1	JVM	KY500598	1221	AK289355	99.92	1	Homo sapiens cDNA FLJ76639 complete cds, highly similar to Homo sapiens ring finger protein 1 (RING1), mRNA
RING1	MOU	KY500599	1221	AK289355	100	0	Homo sapiens cDNA FLJ76639 complete cds, highly similar to Homo sapiens ring finger protein 1 (RING1), mRNA
RING1	TISI	KY500601	1065	BC051866	99.92	1	Homo sapiens ring finger protein 1, mRNA (cDNA clone MGC:60237 IMAGE:6142438), complete cds
RNF39	00huref (PGF)	KY500606	1065	NM_170769	100	0	Homo sapiens ring finger protein 39 (RNF39), transcript variant 2, mRNA
RNF39	AKIBA	KY500607	1065	NM_170769	99.91	1	Homo sapiens ring finger protein 39 (RNF39), transcript variant 2, mRNA
RNF39	AMA1	KY500608	1065	NM_170769	99.62	4	Homo sapiens ring finger protein 39 (RNF39), transcript variant 2, mRNA
RNF39	BTB	KY500609	1065	NM_170769	99.91	1	Homo sapiens ring finger protein 39 (RNF39), transcript variant 2, mRNA
RNF39	DEU	KY500610	1065	NM_170769	99.53	5	Homo sapiens ring finger protein 39 (RNF39), transcript variant 2, mRNA
RNF39	IBW9	KY500611	1065	NM_170769	99.72	3	Homo sapiens ring finger protein 39 (RNF39), transcript variant 2, mRNA
RNF39	MOU	KY500612	1065	AF238316	100	0	Homo sapiens HZFw2 protein mRNA, complete cds
RNF39	QBL	KY500613	1065	NM_170769	99.62	4	Homo sapiens ring finger protein 39 (RNF39), transcript variant 2, mRNA
RNF39	TEM	KY500614	543	NM_170769	99.72	3	Homo sapiens ring finger protein 39 (RNF39), transcript variant 2, mRNA
RNF5	00huref	KY500602	543	BC119742	100	0	Homo sapiens ring finger protein 5, mRNA (cDNA clone MGC:149861 IMAGE:40119200), complete cds
RNF5	COX	KY500603	543	BC119742	99.63	1	Homo sapiens ring finger protein 5, mRNA (cDNA clone MGC:149861 IMAGE:40119200), complete cds
RNF5	PGF	KY500604	543	NM_006913	99.63	1	Homo sapiens ring finger protein 5, mRNA (cDNA clone MGC:165319 IMAGE:40119203), complete cds
RNF5	RSH	KY500605	489	NM_006913	99.45	3	Homo sapiens ring finger protein 5, E3 ubiquitin protein ligase (RNF5), mRNA
RPP21	00huref (PGF)	KY500615	489	NM_001199120	100	0	Homo sapiens ribonuclease P/MRP 21kDa subunit (RPP21), transcript variant 1, mRNA
RPP21	31227ABO	KY500616	489	NM_001199120	99.8	1	Homo sapiens ribonuclease P/MRP 21kDa subunit (RPP21), transcript variant 1, mRNA
RPP21	APD	KY500617	489	NM_001199120	99.8	1	Homo sapiens ribonuclease P/MRP 21kDa subunit (RPP21), transcript variant 1, mRNA
RPP21	E481324	KY500618	489	NM_001199120	99.59	2	Homo sapiens ribonuclease P/MRP 21kDa subunit (RPP21), transcript variant 1, mRNA
RPP21	MCF	KY500619	489	NM_001199120	99.8	1	Homo sapiens ribonuclease P/MRP 21kDa subunit (RPP21), transcript variant 1, mRNA
RPP21	MOU	KY500620	489	NM_001199120	99.59	2	Homo sapiens ribonuclease P/MRP 21kDa subunit (RPP21), transcript variant 1, mRNA
RPP21	TEM	KY500621	459	NM_001199120	99.8	1	Homo sapiens ribonuclease P/MRP 21kDa subunit (RPP21), transcript variant 1, mRNA
RPS18	00huref (PGF)		1614	BC101786	100	0	Homo sapiens ribosomal protein S18, mRNA (cDNA clone MGC:126835 IMAGE:8069292), complete cds
RXRB	00huref (PGF)	KY500622	1614	NM_001270401	100	0	Homo sapiens retinoid X receptor, beta (RXRB), transcript variant 1, mRNA
RXRB	31227ABO	KY500623	537	HQ709179	100	0	Homo sapiens retinoid X nuclear receptor beta (NR2B2) mRNA, complete cds
SAPCD1	00huref (PGF)	KY500624	537	NR_037846	100	0	Homo sapiens MSH5-SAPCD1 readthrough (NMD candidate) (MSH5-SAPCD1), long non-coding RNA
SAPCD1	AMALA	KY500625	537	NR_037846	99.81	1	Homo sapiens MSH5-SAPCD1 readthrough (NMD candidate) (MSH5-SAPCD1), long non-coding RNA
SAPCD1	LUY	KY500626	537	NR_037846	99.81	1	Homo sapiens MSH5-SAPCD1 readthrough (NMD candidate) (MSH5-SAPCD1), long non-coding RNA
SAPCD1	QBL	KY500627	237	NR_037846	99.81	1	Homo sapiens MSH5-SAPCD1 readthrough (NMD candidate) (MSH5-SAPCD1), long non-coding RNA
SFTA2	00huref (PGF)	KY500628	237	NM_205854	100	0	Homo sapiens surfactant associated 2 (SFTA2), mRNA
SFTA2	APD	KY500629	237	BC039677	100	0	Homo sapiens surfactant associated 2, mRNA (cDNA clone MGC:50178 IMAGE:5186107), complete cds
SFTA2	AWELLS	KY500630	3741	AY102070	100	0	Homo sapiens surfactant associated protein G mRNA, partial sequence
SKIV2L	00huref (PGF)	KY500631	3741	NM_006929	100	0	Homo sapiens superkiller viralicidic activity 2-like (S. cerevisiae) (SKIV2L), mRNA
SKIV2L	AMALA	KY500632	3741	NM_006929	99.97	1	Homo sapiens superkiller viralicidic activity 2-like (S. cerevisiae) (SKIV2L), mRNA
SKIV2L	APD	KY500633	3741	X98378	100	0	H.sapiens SKI2W gene
SKIV2L	BM15	KY500634	3741	BC015758	99.97	1	Homo sapiens superkiller viralicidic activity 2-like (S. cerevisiae), mRNA (cDNA clone MGC:23108 IMAGE:4874270), complete cds
SKIV2L	DBB	KY500635	3741	X98378	99.97	1	H.sapiens SKI2W gene
SKIV2L	HOR	KY500636	3741	X98378	99.97	1	H.sapiens SKI2W gene
SKIV2L	IBW9	KY500637	3741	X98378	99.97	1	H.sapiens SKI2W gene
SKIV2L	LKT3	KY500638	3741	X98378	99.97	1	H.sapiens SKI2W gene
SKIV2L	LWAGS	KY500639	3741	X98378	99.95	2	H.sapiens SKI2W gene
SKIV2L	MOU	KY500640	3741	BC015758	99.95	2	Homo sapiens superkiller viralicidic activity 2-like (S. cerevisiae), mRNA (cDNA clone MGC:23108 IMAGE:4874270), complete cds
SKIV2L	WT49	KY500641	1410	X98378	99.97	1	H.sapiens SKI2W gene
SLC39A7	00huref (PGF)	KY500642	1410	NM_006979	100	0	Homo sapiens solute carrier family 39 (zinc transporter), member 7 (SLC39A7), transcript variant 1, mRNA
SLC39A7	31227ABO	KY500643	1410	NM_006979	99.86	2	Homo sapiens solute carrier family 39 (zinc transporter), member 7 (SLC39A7), transcript variant 1, mRNA
SLC39A7	CB6B	KY500644	1410	NM_006979	99.93	1	Homo sapiens solute carrier family 39 (zinc transporter), member 7 (SLC39A7), transcript variant 1, mRNA
SLC39A7	DEU	KY500645	1410	NM_006979	99.93	1	Homo sapiens solute carrier family 39 (zinc transporter), member 7 (SLC39A7), transcript variant 1, mRNA
SLC39A7	IBW9	KY500646	1410	NM_006979	99.93	1	Homo sapiens solute carrier family 39 (zinc transporter), member 7 (SLC39A7), transcript variant 1, mRNA
SLC39A7	KAS116	KY500647	1410	NM_006979	99.93	1	Homo sapiens solute carrier family 39 (zinc transporter), member 7 (SLC39A7), transcript variant 1, mRNA
SLC39A7	MGAR	KY500648	1410	NM_006979	99.93	1	Homo sapiens solute carrier family 39 (zinc transporter), member 7 (SLC39A7), transcript variant 1, mRNA
SLC39A7	SSTO	KY500649	1410	NM_006979	99.93	1	Homo sapiens solute carrier family 39 (zinc transporter), member 7 (SLC39A7), transcript variant 1, mRNA
SLC39A7	YAR	KY500650	1905	NM_006979	99.93	1	Homo sapiens solute carrier family 39 (zinc transporter), member 7 (SLC39A7), transcript variant 1, mRNA
SLC44A4	00huref (PGF)	KY500651	1905	NM_001178045	100	0	Homo sapiens solute carrier family 44, member 4 (SLC44A4), transcript variant 3, mRNA
SLC44A4	APD	KY500652	1905	AK222998	100	0	Homo sapiens mRNA for NG22 protein variant, clone: HSI07967
SLC44A4	AZH	KY500653	1905	AK314673	100	0	Homo sapiens cDNA, FLJ95521
SLC44A4	EK	KY500654	1905	AK314673	99.95	1	Homo sapiens cDNA, FLJ95521
SLC44A4	HOR	KY500655	1905	AK222998	99.95	1	Homo sapiens mRNA for NG22 protein variant, clone: HSI07967
SLC44A4	MOU	KY500656	1905	AK222998	99.95	1	Homo sapiens mRNA for NG22 protein variant, clone: HSI07967
SLC44A4	PLH	KY500657	1095	AK222998	99.95	1	Homo sapiens mRNA for NG22 protein variant, clone: HSI07967
STK19	00huref (PGF)	KY500658	1095	NM_004197	100	0	Homo sapiens serine/threonine kinase 19 (STK19), transcript variant 1, mRNA
STK19	AKIBA	KY500659	1095	NM_004197	99.91	1	Homo sapiens serine/threonine kinase 19 (STK19), transcript variant 1, mRNA
STK19	BER	KY500660	1095	NM_004197	99.73	3	Homo sapiens serine/threonine kinase 19 (STK19), transcript variant 1, mRNA
STK19	BM14	KY500661	1095	NM_004197	99.82	2	Homo sapiens serine/threonine kinase 19 (STK19), transcript variant 1, mRNA
STK19	QBL	KY500662	4032	NM_004197	99.91	1	Homo sapiens serine/threonine kinase 19 (STK19), transcript variant 1, mRNA
SYNGAP1	00huref (PGF)	KY500667	4032	NM_006772	100	0	Homo sapiens synaptic Ras GTPase activating protein 1 (SYNGAP1), mRNA
SYNGAP1	AMA1	KY500663	4032	NM_006772	99.98	1	Homo sapiens synaptic Ras GTPase activating protein 1 (SYNGAP1), mRNA
SYNGAP1	APD	KY500664	4032	NM_006772	99.98	1	Homo sapiens synaptic Ras GTPase activating protein 1 (SYNGAP1), mRNA
SYNGAP1	JBUSH	KY500665	4032	NM_006772	99.95	2	Homo sapiens synaptic Ras GTPase activating protein 1 (SYNGAP1), mRNA
SYNGAP1	QBL	KY500666	1347	AB067525	100	0	Homo sapiens mRNA for KIAA1938 protein, partial cds
TAPBP	00huref (PGF)	KY500668	1347	NM_003190	100	0	Homo sapiens TAP binding protein (tapasin) (TAPBP), transcript variant 1, mRNA
TAPBP	BM21	KY500669	1347	NM_003190	99.93	1	Homo sapiens TAP binding protein (tapasin) (TAPBP), transcript variant 1, mRNA
TAPBP	COX	KY500670	1038	BC010279	100	0	Homo sapiens cDNA clone IMAGE:3047913, **** WARNING: chimeric clone ****
TCF19	00huref (PGF)	KY500671	1038	XM_011514829	100	0	PREDICTED: Homo sapiens transcription factor 19 (TCF19), transcript variant X1, mRNA
TCF19	AKIBA	KY500672	1038	XM_011514829	99.9	1	PREDICTED: Homo sapiens transcription factor 19 (TCF19), transcript variant X1, mRNA
TCF19	APD	KY500673	1038	XM_011547680	100	0	PREDICTED: Homo sapiens transcription factor 19 (TCF19), transcript variant X6, mRNA
TCF19	BM09	KY500674	1038	BC002493	100	0	Homo sapiens transcription factor 19, mRNA (cDNA clone MGC:2575 IMAGE:3051226), complete cds
TCF19	COX	KY500675	702	XM_011547277	100	0	PREDICTED: Homo sapiens transcription factor 19 (TCF19), transcript variant X2, mRNA
TNF	00huref (PGF)	KY500676	702	NM_000594	100	0	Homo sapiens tumor necrosis factor (TNF), mRNA
TNF	BM21	KY500677	702	NM_000594	99.86	1	Homo sapiens tumor necrosis factor (TNF), mRNA
TNF	RSH	KY500678	1188	NM_000594	99.86	1	Homo sapiens tumor necrosis factor (TNF), mRNA
TRIM10	00huref (PGF)	KY500679	1188	NM_052828	100	0	Homo sapiens tripartite motif containing 10 (TRIM10), transcript variant 2, mRNA
TRIM10	APD	KY500680	1188	XM_011547170	100	0	PREDICTED: Homo sapiens tripartite motif containing 10 (TRIM10), transcript variant X14, mRNA
TRIM10	AWELLS	KY500681	1188	XM_011547170	99.83	2	PREDICTED: Homo sapiens tripartite motif containing 10 (TRIM10), transcript variant X14, mRNA
TRIM10	BM09	KY500682	1398	XM_011547170	99.92	1	PREDICTED: Homo sapiens tripartite motif containing 10 (TRIM10), transcript variant X14, mRNA
TRIM15	00huref (PGF)	KY500683	1398	NM_033229	100	0	Homo sapiens tripartite motif containing 15 (TRIM15), mRNA
TRIM15	31227ABO	KY500684	1398	U34249	100	0	Human putative zinc finger protein (ZNFB7) mRNA, complete cds
TRIM15	APD	KY500685	1398	AK291853	99.93	1	Homo sapiens cDNA FLJ75016 complete cds, highly similar to Homo sapiens tripartite motif-containing 15 (TRIM15), transcript variant 1, mRNA
TRIM15	BER	KY500686	1398	NM_033229	99.93	1	Homo sapiens tripartite motif containing 15 (TRIM15), mRNA
TRIM15	LBF	KY500687	1398	AK291853	100	0	Homo sapiens cDNA FLJ75016 complete cds, highly similar to Homo sapiens tripartite motif-containing 15 (TRIM15), transcript variant 1, mRNA
TRIM15	MCF	KY500688	1398	BC038585	100	0	Homo sapiens tripartite motif-containing 15, mRNA (cDNA clone MGC:45988 IMAGE:5758860), complete cds
TRIM15	TEM	KY500689	1398	BC038585	99.93	1	Homo sapiens tripartite motif-containing 15, mRNA (cDNA clone MGC:45988 IMAGE:5758860), complete cds
TRIM15	WT100BIS	KY500690	1620	U34249	99.86	2	Human putative zinc finger protein (ZNFB7) mRNA, complete cds
TRIM26	00huref (PGF)	KY500691	1620	XM_005249374	100	0	PREDICTED: Homo sapiens tripartite motif containing 26 (TRIM26), transcript variant X4, mRNA
TRIM26	AMALA	KY500692	1620	XM_005249374	99.94	1	PREDICTED: Homo sapiens tripartite motif containing 26 (TRIM26), transcript variant X4, mRNA
TRIM26	AWELLS	KY500693	1620	XM_005249374	99.94	1	PREDICTED: Homo sapiens tripartite motif containing 26 (TRIM26), transcript variant X4, mRNA
TRIM26	COX	KY500694	1620	XM_005272870	100	0	PREDICTED: Homo sapiens tripartite motif containing 26 (TRIM26), transcript variant X4, mRNA
TRIM26	KGU	KY500695	1620	XM_005249374	99.81	3	PREDICTED: Homo sapiens tripartite motif containing 26 (TRIM26), transcript variant X4, mRNA
TRIM26	MCF	KY500696	1620	XM_005275590	100	0	PREDICTED: Homo sapiens tripartite motif containing 26 (TRIM26), transcript variant X4, mRNA
TRIM26	WT51	KY500697	1542	XM_005249374	99.94	1	PREDICTED: Homo sapiens tripartite motif containing 26 (TRIM26), transcript variant X4, mRNA
TRIM27	00huref (PGF)	KY500698	1542	XM_012158826	100	0	PREDICTED: Ovis aries musimon tripartite motif containing 27 (TRIM27), transcript variant X2, mRNA
TRIM27	COX	KY500699	1278	XM_012158826	99.92	1	PREDICTED: Ovis aries musimon tripartite motif containing 27 (TRIM27), transcript variant X2, mRNA
TRIM31	00huref (PGF)	KY500700	1278	XR_926036	100	0	PREDICTED: Homo sapiens tripartite motif containing 31 (TRIM31), transcript variant X16, misc_RNA
TRIM31	31227ABO	KY500701	1278	XR_926036	99.92	1	PREDICTED: Homo sapiens tripartite motif containing 31 (TRIM31), transcript variant X16, misc_RNA
TRIM31	AMA1	KY500702	1278	XR_926036	99.92	1	PREDICTED: Homo sapiens tripartite motif containing 31 (TRIM31), transcript variant X16, misc_RNA
TRIM31	APD	KY500703	1278	XR_952595	100	0	PREDICTED: Homo sapiens tripartite motif containing 31 (TRIM31), transcript variant X16, misc_RNA
TRIM31	COX	KY500704	1278	XR_430855	100	0	PREDICTED: Homo sapiens tripartite motif containing 31 (TRIM31), transcript variant X1, misc_RNA
TRIM31	DEU	KY500705	1278	XR_952595	99.92	1	PREDICTED: Homo sapiens tripartite motif containing 31 (TRIM31), transcript variant X16, misc_RNA
TRIM31	DKB	KY500706	1278	XR_926036	99.84	2	PREDICTED: Homo sapiens tripartite motif containing 31 (TRIM31), transcript variant X16, misc_RNA
TRIM31	IBW9	KY500707	1278	XR_952595	99.92	1	PREDICTED: Homo sapiens tripartite motif containing 31 (TRIM31), transcript variant X16, misc_RNA
TRIM31	JO528239	KY500708	1278	XR_952595	99.92	1	PREDICTED: Homo sapiens tripartite motif containing 31 (TRIM31), transcript variant X16, misc_RNA
TRIM31	KGU	KY500709	1278	XR_952797	99.77	3	PREDICTED: Homo sapiens tripartite motif containing 31 (TRIM31), transcript variant X16, misc_RNA
TRIM31	MCF	KY500710	1278	XR_952939	100	0	PREDICTED: Homo sapiens tripartite motif containing 31 (TRIM31), transcript variant X16, misc_RNA
TRIM31	MOU	KY500711	1278	XR_952797	100	0	PREDICTED: Homo sapiens tripartite motif containing 31 (TRIM31), transcript variant X16, misc_RNA
TRIM31	OMW	KY500712	1278	XR_926036	99.92	1	PREDICTED: Homo sapiens tripartite motif containing 31 (TRIM31), transcript variant X16, misc_RNA
TRIM31	QBL	KY500713	1278	XR_953001	100	0	PREDICTED: Homo sapiens tripartite motif containing 31 (TRIM31), transcript variant X10, misc_RNA
TRIM31	WJR076D	KY500714	1278	XR_952939	99.92	1	PREDICTED: Homo sapiens tripartite motif containing 31 (TRIM31), transcript variant X16, misc_RNA
TRIM31	WT49	KY500715	1557	XR_952797	99.92	1	PREDICTED: Homo sapiens tripartite motif containing 31 (TRIM31), transcript variant X16, misc_RNA
TRIM39	00huref (PGF)	KY500716	1557	AK292512	100	0	Homo sapiens cDNA FLJ76683 complete cds, highly similar to Homo sapiens tripartite motif-containing 39 (TRIM39), transcript variant 1, mRNA
TRIM39	MOU	KY500717	1557	XM_009450812	99.87	2	PREDICTED: Pan troglodytes tripartite motif containing 39 (TRIM39), transcript variant X1, mRNA
TRIM39	QBL	KY500718	1557	AK292512	99.94	1	Homo sapiens cDNA FLJ76683 complete cds, highly similar to Homo sapiens tripartite motif-containing 39 (TRIM39), transcript variant 1, mRNA
TRIM39	TEM	KY500719	777	XM_009450812	99.94	1	PREDICTED: Pan troglodytes tripartite motif containing 39 (TRIM39), transcript variant X1, mRNA
TRIM40	00huref (PGF)	KY500720	777	XM_011514305	100	0	PREDICTED: Homo sapiens tripartite motif containing 40 (TRIM40), transcript variant X8, mRNA
TRIM40	DBB	KY500721	777	XM_011547604	100	0	PREDICTED: Homo sapiens tripartite motif containing 40 (TRIM40), transcript variant X2, mRNA
TRIM40	MCF	KY500722	777	XM_011548384	100	0	PREDICTED: Homo sapiens tripartite motif containing 40 (TRIM40), transcript variant X8, mRNA
TRIM40	WT49	KY500723	729	XM_011514305	99.74	2	PREDICTED: Homo sapiens tripartite motif containing 40 (TRIM40), transcript variant X8, mRNA
TUBB	00huref (PGF)		498	NM_001293213	100	0	Homo sapiens tubulin, beta class I (TUBB), transcript variant 3, mRNA
UBD	00huref (PGF)	KY500724	498	NM_006398	100	0	Homo sapiens ubiquitin D (UBD), mRNA
UBD	AKIBA	KY500725	498	AK311914	99.8	1	Homo sapiens cDNA, FLJ92181, highly similar to Homo sapiens ubiquitin D (UBD), mRNA
UBD	APD	KY500726	498	Y12653	99.8	1	H.sapiens mRNA for diubiquitin
UBD	COX	KY500727	498	AF123050	100	0	Homo sapiens ubiquitin-like protein FAT10 (FAT10) mRNA, complete cds
UBD	KAWASAKI	KY500728	498	AK311914	99.6	2	Homo sapiens cDNA, FLJ92181, highly similar to Homo sapiens ubiquitin D (UBD), mRNA
UBD	MCF	KY500729	3282	Y12653	100	0	H.sapiens mRNA for diubiquitin
VARS	00huref (PGF)	KY500914	3282	NM_006295	100	0	Homo sapiens valyl-tRNA synthetase (VARS), mRNA
VARS	AMA1	KY500905	3282	NM_006295	99.97	1	Homo sapiens valyl-tRNA synthetase (VARS), mRNA
VARS	APD	KY500906	3282	BC012808	99.97	1	Homo sapiens valyl-tRNA synthetase, mRNA (cDNA clone MGC:3537 IMAGE:3529215), complete cds
VARS	BM09	KY500907	3282	NM_006295	99.95	2	Homo sapiens valyl-tRNA synthetase (VARS), mRNA
VARS	BM21	KY500908	3282	NM_006295	99.95	2	Homo sapiens valyl-tRNA synthetase (VARS), mRNA
VARS	HOR	KY500909	3282	NM_006295	99.97	1	Homo sapiens valyl-tRNA synthetase (VARS), mRNA
VARS	IBW9	KY500910	3282	NM_006295	99.95	2	Homo sapiens valyl-tRNA synthetase (VARS), mRNA
VARS	ISH3	KY500911	3282	BC012808	99.95	2	Homo sapiens valyl-tRNA synthetase, mRNA (cDNA clone MGC:3537 IMAGE:3529215), complete cds
VARS	QBL	KY500912	3282	NM_006295	99.97	1	Homo sapiens valyl-tRNA synthetase (VARS), mRNA
VARS	RSH	KY500913	3282	NM_006295	99.97	1	Homo sapiens valyl-tRNA synthetase (VARS), mRNA
VARS2	00huref (PGF)	KY500915	3795	NM_001167734	100	0	Homo sapiens valyl-tRNA synthetase 2, mitochondrial (VARS2), transcript variant 1, mRNA
VARS2	APD	KY500916	3795	NM_001167734	99.82	6	Homo sapiens valyl-tRNA synthetase 2, mitochondrial (VARS2), transcript variant 1, mRNA
VARS2	BM09	KY500917	3795	NM_001167734	99.94	2	Homo sapiens valyl-tRNA synthetase 2, mitochondrial (VARS2), transcript variant 1, mRNA
VARS2	BM15	KY500918	3795	AK304807	99.88	4	Homo sapiens cDNA FLJ55611 complete cds, highly similar to Homo sapiens valyl-tRNA synthetase like (VARSL), mRNA
VARS2	COX	KY500919	3795	NM_001167734	99.94	2	Homo sapiens valyl-tRNA synthetase 2, mitochondrial (VARS2), transcript variant 1, mRNA
VARS2	JHAF	KY500920	3795	AK304807	99.88	4	Homo sapiens cDNA FLJ55611 complete cds, highly similar to Homo sapiens valyl-tRNA synthetase like (VARSL), mRNA
VARS2	JO528239	KY500921	3795	AK304807	99.88	4	Homo sapiens cDNA FLJ55611 complete cds, highly similar to Homo sapiens valyl-tRNA synthetase like (VARSL), mRNA
VARS2	LBF	KY500922	3795	NM_001167734	99.91	3	Homo sapiens valyl-tRNA synthetase 2, mitochondrial (VARS2), transcript variant 1, mRNA
VARS2	MCF	KY500923	3795	AK304807	99.91	3	Homo sapiens cDNA FLJ55611 complete cds, highly similar to Homo sapiens valyl-tRNA synthetase like (VARSL), mRNA
VARS2	WJR076D	KY500924	3795	NM_001167734	99.79	7	Homo sapiens valyl-tRNA synthetase 2, mitochondrial (VARS2), transcript variant 1, mRNA
VPS52	00huref (PGF)	KY500730	1797	XM_011514797	100	0	PREDICTED: Homo sapiens vacuolar protein sorting 52 homolog (S. cerevisiae) (VPS52), transcript variant X1, mRNA
VPS52	APD	KY500731	1797	XM_011548072	100	0	PREDICTED: Homo sapiens vacuolar protein sorting 52 homolog (S. cerevisiae) (VPS52), transcript variant X1, mRNA
VPS52	LBF	KY500732	1797	XM_011514797	99.94	1	PREDICTED: Homo sapiens vacuolar protein sorting 52 homolog (S. cerevisiae) (VPS52), transcript variant X1, mRNA
VWA7	00huref (PGF)	KY500733	2676	NM_025258	100	0	Homo sapiens von Willebrand factor A domain containing 7 (VWA7), mRNA
VWA7	BM09	KY500734	2676	NM_025258	99.93	2	Homo sapiens von Willebrand factor A domain containing 7 (VWA7), mRNA
VWA7	BOLETH	KY500735	2676	NM_025258	99.96	1	Homo sapiens von Willebrand factor A domain containing 7 (VWA7), mRNA
VWA7	BTB	KY500736	2676	NM_025258	99.96	1	Homo sapiens von Willebrand factor A domain containing 7 (VWA7), mRNA
VWA7	COX	KY500737	2676	NM_025258	99.93	2	Homo sapiens von Willebrand factor A domain containing 7 (VWA7), mRNA
VWA7	MGAR	KY500738	2676	NM_025258	99.93	2	Homo sapiens von Willebrand factor A domain containing 7 (VWA7), mRNA
VWA7	RSH	KY500739	2676	NM_025258	99.96	1	Homo sapiens von Willebrand factor A domain containing 7 (VWA7), mRNA
VWA7	WT49	KY500740	2676	NM_025258	99.96	1	Homo sapiens von Willebrand factor A domain containing 7 (VWA7), mRNA
WDR46	00huref (PGF)	KY500741	1671	NM_001164267	100	0	Homo sapiens WD repeat domain 46 (WDR46), transcript variant 2, mRNA
WDR46	APD	KY500742	1671	NM_001164267	99.94	1	Homo sapiens WD repeat domain 46 (WDR46), transcript variant 2, mRNA
WDR46	CB6B	KY500743	1671	NM_001164267	99.88	2	Homo sapiens WD repeat domain 46 (WDR46), transcript variant 2, mRNA
WDR46	QBL	KY500744	1671	NM_001164267	99.82	3	Homo sapiens WD repeat domain 46 (WDR46), transcript variant 2, mRNA
ZBED9	00huref (PGF)	KY500745	3978	BC110834	100	0	Homo sapiens SCAN domain containing 3, mRNA (cDNA clone MGC:131782 IMAGE:6499684), complete cds
ZBED9	AWELLS	KY500746	3978	BC110834	99.97	1	Homo sapiens SCAN domain containing 3, mRNA (cDNA clone MGC:131782 IMAGE:6499684), complete cds
ZBED9	COX	KY500747	3978	BC111741	99.97	1	Homo sapiens SCAN domain containing 3, mRNA (cDNA clone MGC:133311 IMAGE:40038622), complete cds
ZBED9	DUCAF	KY500748	3978	BC111741	99.97	1	Homo sapiens SCAN domain containing 3, mRNA (cDNA clone MGC:133311 IMAGE:40038622), complete cds
ZBED9	OMW	KY500749	3978	BC111742	100	0	Homo sapiens SCAN domain containing 3, mRNA (cDNA clone MGC:133310 IMAGE:40038617), complete cds
ZBED9	SSTO	KY500750	3978	BC111741	100	0	Homo sapiens SCAN domain containing 3, mRNA (cDNA clone MGC:133311 IMAGE:40038622), complete cds
ZBTB22	00huref (PGF)	KY500754	1905	NM_005453	100	0	Homo sapiens zinc finger and BTB domain containing 22 (ZBTB22), transcript variant 1, mRNA
ZBTB22	COX	KY500755	1905	AK315747	100	0	Homo sapiens cDNA, FLJ96856, Homo sapiens zinc finger protein 297 (ZNF297), mRNA
ZBTB22	DEU	KY500756	1905	NM_005453	99.95	1	Homo sapiens zinc finger and BTB domain containing 22 (ZBTB22), transcript variant 1, mRNA
ZBTB9	00huref (PGF)	KY500751	1422	NM_152735	100	0	Homo sapiens zinc finger and BTB domain containing 9 (ZBTB9), mRNA
ZBTB9	APD	KY500752	1422	BX088650	100	0	Human DNA sequence from clone DASS-97D12 on chromosome 6, complete sequence
ZBTB9	IBW9	KY500753	1422	BX088650	99.93	1	Human DNA sequence from clone DASS-97D12 on chromosome 6, complete sequence
ZFP57	00huref (PGF)	KY500757	1611	XM_011514570	100	0	PREDICTED: Homo sapiens ZFP57 zinc finger protein (ZFP57), transcript variant X6, mRNA
ZFP57	APD	KY500758	1611	XM_011514570	99.94	1	PREDICTED: Homo sapiens ZFP57 zinc finger protein (ZFP57), transcript variant X6, mRNA
ZFP57	MADURA	KY500759	1611	XM_011514570	99.94	1	PREDICTED: Homo sapiens ZFP57 zinc finger protein (ZFP57), transcript variant X6, mRNA
ZFP57	MANIKA	KY500760	1611	XM_011514570	99.94	1	PREDICTED: Homo sapiens ZFP57 zinc finger protein (ZFP57), transcript variant X6, mRNA
ZFP57	SLE005	KY500761	1611	XM_011514570	99.94	1	PREDICTED: Homo sapiens ZFP57 zinc finger protein (ZFP57), transcript variant X6, mRNA
ZFP57	TEM	KY500762	1611	XM_011514570	99.88	2	PREDICTED: Homo sapiens ZFP57 zinc finger protein (ZFP57), transcript variant X6, mRNA
ZFP57	WT51	KY500763	1611	XM_011514570	99.94	1	PREDICTED: Homo sapiens ZFP57 zinc finger protein (ZFP57), transcript variant X6, mRNA
ZNF311	00huref (PGF)	KY500764	2001	XM_011514515	100	0	PREDICTED: Homo sapiens zinc finger protein 311 (ZNF311), transcript variant X6, mRNA
ZNF311	FPAF	KY500765	2001	XM_011548418	99.95	1	PREDICTED: Homo sapiens zinc finger protein 311 (ZNF311), transcript variant X16, mRNA
ZNF311	JHAF	KY500766	2001	XM_011514515	99.95	1	PREDICTED: Homo sapiens zinc finger protein 311 (ZNF311), transcript variant X6, mRNA
ZNF311	MCF	KY500767	2001	XM_011548418	100	0	PREDICTED: Homo sapiens zinc finger protein 311 (ZNF311), transcript variant X16, mRNA
ZNRD1	00huref (PGF)	KY500768	381	XM_009450855	100	0	PREDICTED: Pan troglodytes zinc ribbon domain containing 1 (ZNRD1), transcript variant X1, mRNA
ZNRD1	MGAR	KY500769	381	BC050608	100	0	Homo sapiens zinc ribbon domain containing 1, mRNA (cDNA clone MGC:60063 IMAGE:6151023), complete cds
ZNRD1	WT49	KY500770	381	XM_009450855	99.74	1	PREDICTED: Pan troglodytes zinc ribbon domain containing 1 (ZNRD1), transcript variant X1, mRNA

## Sheet: C_invariantPP
		Gene	CDS		Gene	CDS
		C6orf48	1		B3GALT4	2
		CUTA	1		CSNK2B	2
		GPX5	1		NELFE	2
		LOC100129636	1		NRM	2
		LSM2	1		PPP1R11	2
		LST1	1		RXRB	2
		OR2B3	1		TRIM27	2
		PFDN6	1		DDX39B	3
		PSMB8	1		FLOT1	3
		RPS18	1		GPSM3	3
		TUBB	1		GTF2H4	3
		ZBTB12	1		RNF5	3
		ABCF1	2		VPS52	3
		AGPAT1	2		ABHD16A	4
		APOM	2		TRIM39	4
		ATAT1	2		SYNGAP1	5
