# Supplementary material for: Sequences of 95 humanMHChaplotypes reveal extreme coding variation in genes other than highly polymorphicHLA class IandII
Source: HighWire-hosted journal article supplement (doi:10.1101/gr.213538.116), 2017-03-30
Supplement: Supplemental_Table_S4.xlsx [file Supplemental_Table_S4.xlsx]

## Sheet: CDS_haplotypes
	1	2	3	4	5	6	7	8	9	10	11	12	13	14	15	16	17	18	19	20	21	22	23	24	25	26	27	28	29	30	31	32	33	34	35	36	37	38	39	40	41	42	43	44	45	46	47	48	49
gene symbol	GPX5	ZBED9	TRIM27	ZNF311	LOC100129636	OR2W1	OR2B3	OR2J3	OR2J2	OR14J1	OR5V1	OR12D3	OR12D2	OR11A1	OR10C1	OR2H1	MAS1L	UBD	OR2H2	GABBR1	MOG	ZFP57	HLA-F	LOC554223	HLA-G	HLA-A	ZNRD1	PPP1R11	RNF39	TRIM31	TRIM40	TRIM10	TRIM15	TRIM26	TRIM39	RPP21	HLA-E	GNL1	PRR3	ABCF1	PPP1R10	MRPS18B	ATAT1	C6orf136	DHX16	PPP1R18	NRM	MDC1	TUBB
cell line
(huref hg19)	huref	huref	huref	huref	huref	huref	huref	huref	huref	huref	huref	huref	huref	huref	huref	huref	huref	huref	huref	huref	huref	huref	F*01:03	huref	G*01:01:01	A*03:01:01:01	huref	huref	huref	huref	huref	huref	huref	huref	huref	huref	E*01:03:02	huref	huref	huref	huref	huref	huref	huref	huref	huref	huref	huref	huref
31227ABO	huref	huref	huref	huref	huref	huref	huref	APD	APD	APD	APD	APD	DBB	huref	huref	huref	huref	huref	huref	huref	APD	huref	F*01:01:01:08	huref	G*01:01:01	A*02:01:01:01	huref	huref	huref	31227ABO	huref	APD	31227ABO	huref	huref	31227ABO	E*01:03:02	APD	APD	huref	huref	huref	huref	huref	QBL	huref	huref	QBL	huref
AKIBA	huref	SSTO	huref	MCF	huref	AKIBA	huref	huref	AKIBA	huref	APD	AKIBA	SSTO	AKIBA	AKIBA	AKIBA	AKIBA	AKIBA	AKIBA	AKIBA	APD	AKIBA	F*01:01:02:01	huref	G*01:04:01	A*24:02:01:01	huref	huref	AKIBA	MOU	huref	APD	31227ABO	huref	MOU	MOU	E*01:03:01	APD	APD	huref	AKIBA	huref	huref	huref	huref	SSTO	huref	huref	huref
AMA1	huref	SSTO	huref	MCF	huref	AMA1	huref	AMA1	COX	APD	AMA1	AKIBA	APD	huref	AKIBA	AKIBA	AKIBA	AKIBA	COX	huref	APD	huref	F*01:01:01:01	APD	G*01:01:02	A*68:02:01:01	huref	QBL	AMA1	AMA1	huref	APD	APD	COX	MOU	MOU	E*01:03:02	huref	AMA1	huref	huref	AMA1	AMA1	huref	huref	huref	huref	AMA1	huref
AMALA	huref	huref	huref	huref	huref	huref	huref	APD	APD	APD	APD	APD	AMALA	SSTO	SSTO	huref	huref	MCF	APD	huref	MCF	huref	F*01:01:01:01	huref	G*01:01:01	A*02:17:02	huref	huref	huref	MCF	huref	APD	huref	AMALA	huref	MCF	E*01:03:02	huref	huref	huref	huref	huref	huref	huref	huref	huref	huref	huref	huref
APD	huref	huref	huref	huref	huref	huref	huref	APD	APD	APD	APD	APD	APD	huref	APD	huref	huref	APD	APD	APD	APD	huref	F*01:01:01:09	APD	G*01:06	A*01:01:01:01	huref	huref	huref	APD	huref	APD	APD	huref	huref	APD	E*01:01:01	APD	APD	huref	huref	huref	huref	huref	huref	APD	huref	APD	huref
AWELLS	het	het	het	het	het	het	het	het	het	het	het	het	het	het	het	het	het	het	het	het	het	het	F*01:01:01:01	huref	G*01:01:01	A*02:01:01:01	huref	huref	huref	MCF	MCF	APD	MCF	MCF	huref	MCF	E*01:01:01	APD	APD	huref	huref	huref	huref	huref	huref	huref	huref	huref	huref
AZH	huref	huref	huref	MCF	huref	huref	huref	MCF	COX	huref	MCF	MCF	APD	huref	huref	huref	huref	MCF	huref	huref	APD	huref	F*01:01:01:08	huref	G*01:04:01	A*24:02:01:01	huref	huref	huref	MOU	huref	APD	31227ABO	huref	MOU	MOU	E*01:03:01	APD	APD	huref	huref	huref	huref	huref	huref	SSTO	huref	huref	huref
BEI	huref	huref	huref	huref	huref	huref	huref	APD	APD	APD	APD	APD	DBB	huref	huref	huref	huref	huref	huref	huref	APD	huref	F*01:01:01:08	huref	G*01:01:01	A*02:01:01:01	huref	huref	huref	APD	DBB	APD	APD	huref	huref	APD	E*01:01:01	APD	APD	huref	huref	huref	huref	huref	huref	APD	huref	APD	huref
BER	het	het	het	het	het	het	het	het	het	het	het	het	DBB	huref	huref	huref	huref	huref	huref	huref	APD	huref	F*01:01:01:08	huref	G*01:01:01	A*02:01:01:01	huref	huref	huref	31227ABO	huref	AWELLS	BER	AWELLS	QBL	het	het	het	het	het	het	het	het	het	het	het	het	het	het
BGED	het	het	het	het	het	het	het	het	het	het	het	het	het	het	het	het	het	het	het	het	het	het	het	het	het	het	het	het	het	het	het	het	het	het	het	het	het	het	het	het	het	het	het	huref	huref	huref	huref	huref	huref
BH	het	het	het	het	het	het	het	het	het	het	het	het	het	het	het	het	het	het	het	het	het	het	het	het	het	het	het	het	het	het	het	het	het	het	het	het	het	het	het	het	het	het	het	het	het	het	het	het	het
BM09	huref	huref	huref	huref	huref	huref	huref	APD	APD	APD	APD	APD	DBB	huref	huref	huref	huref	huref	huref	huref	MCF	huref	F*01:01:01:01	huref	G*01:01:01	A*02:01:01:01	huref	huref	huref	31227ABO	huref	BM09	huref	huref	huref	huref	E*01:01:01	APD	APD	huref	huref	huref	huref	huref	huref	huref	huref	huref	huref
BM14	huref	huref	huref	huref	huref	huref	huref	APD	APD	APD	APD	APD	DBB	huref	huref	huref	huref	huref	huref	huref	huref	huref	F*01:03	huref	G*01:01:01	A*03:01:01:01	huref	huref	huref	huref	huref	huref	huref	huref	huref	huref	E*01:03:02	huref	huref	huref	huref	huref	huref	huref	huref	huref	huref	huref	huref
BM15	huref	COX	huref	MCF	huref	huref	huref	MCF	BM15	huref	APD	huref	SSTO	SSTO	SSTO	huref	huref	MCF	APD	APD	APD	huref	F*01:01:01:09	APD	G*01:06	A*01:01:01:01	huref	huref	huref	APD	huref	APD	APD	huref	huref	APD	E*01:01:01	APD	APD	huref	huref	huref	huref	huref	huref	huref	huref	huref	huref
BM16	het	het	het	het	het	het	het	het	het	het	het	het	het	het	het	het	het	het	huref	huref	BM16	huref	F*01:01:02:01	huref	G*01:01:01	A*02:01:01:01	huref	huref	huref	MCF	MCF	APD	MCF	MCF	huref	MCF	E*01:03:02	APD	APD	huref	huref	huref	huref	huref	QBL	huref	huref	QBL	huref
BM21	huref	SSTO	huref	MCF	huref	AKIBA	huref	huref	BM21	huref	MCF	huref	SSTO	SSTO	SSTO	huref	huref	MCF	APD	APD	APD	huref	F*01:01:01:09	APD	G*01:06	A*01:01:01:01	huref	huref	huref	APD	huref	APD	APD	huref	huref	APD	E*01:01:01	APD	APD	huref	huref	huref	huref	huref	huref	BM21	huref	APD	huref
BOLETH	huref	huref	huref	huref	huref	huref	huref	APD	APD	APD	APD	APD	DBB	huref	huref	huref	huref	huref	huref	huref	APD	huref	F*01:01:01:08	huref	G*01:01:01	A*02:01:01:01	huref	huref	huref	31227ABO	huref	BM09	huref	AWELLS	QBL	APD	E*01:01:01	APD	APD	huref	huref	huref	huref	huref	QBL	huref	huref	QBL	huref
BSM	huref	huref	huref	MCF	huref	huref	huref	MCF	COX	huref	MCF	MCF	APD	huref	huref	huref	huref	MCF	APD	huref	MCF	huref	F*01:01:01:01	huref	G*01:01:01	A*02:01:01:01	huref	huref	huref	MCF	MCF	APD	MCF	MCF	huref	MCF	E*01:03:02	huref	huref	huref	huref	huref	huref	huref	huref	huref	huref	huref	huref
BTB	huref	SSTO	huref	MCF	huref	AKIBA	huref	huref	BM21	APD	MCF	APD	APD	huref	APD	huref	huref	APD	BTB	huref	MCF	huref	F*01:01:01:01	huref	G*01:01:01	A*02:01:01:01	huref	huref	BTB	MCF	MCF	APD	MCF	MCF	huref	MCF	E*01:03:02	huref	huref	huref	huref	huref	huref	huref	huref	huref	huref	huref	huref
CALOGERO	huref	huref	huref	huref	huref	huref	huref	APD	APD	APD	APD	APD	DBB	huref	huref	huref	huref	huref	huref	huref	APD	huref	F*01:01:01:08	huref	G*01:01:01	A*02:01:01:01	huref	huref	huref	31227ABO	huref	AWELLS	BER	AWELLS	QBL	APD	E*01:01:01	APD	APD	huref	huref	huref	huref	huref	QBL	APD	huref	QBL	huref
CB6B	huref	COX	huref	MCF	huref	huref	huref	MCF	BM15	huref	APD	huref	SSTO	SSTO	SSTO	huref	huref	MCF	APD	APD	APD	huref	F*01:01:01:09	APD	G*01:06	A*01:01:01:01	huref	huref	huref	APD	DBB	APD	APD	huref	huref	APD	E*01:01:01	APD	APD	huref	huref	huref	huref	huref	huref	APD	huref	APD	huref
COX	huref	COX	COX	huref	huref	huref	huref	APD	COX	huref	APD	COX	APD	huref	APD	huref	huref	COX	COX	huref	APD	huref	F*01:01:01:09	APD	G*01:01:02	A*01:01:01:01	huref	huref	huref	COX	huref	APD	huref	COX	huref	huref	E*01:01:01	COX	APD	huref	huref	huref	huref	huref	huref	COX	huref	huref	huref
DBB	huref	huref	huref	huref	huref	huref	huref	APD	APD	APD	APD	APD	DBB	huref	huref	huref	huref	huref	huref	DBB	APD	huref	F*01:01:01:08	huref	G*01:01:01	A*02:01:01:01	huref	huref	huref	APD	DBB	APD	APD	huref	huref	APD	E*01:01:01	APD	APD	huref	huref	huref	huref	huref	huref	APD	huref	APD	huref
DEMD	het	het	het	het	het	het	het	het	het	het	het	het	het	het	het	het	het	het	het	het	het	het	het	het	het	het	het	het	het	het	het	het	het	het	het	het	het	het	het	het	het	het	het	het	het	het	het	het	het
DEU	huref	COX	huref	huref	huref	huref	huref	APD	APD	APD	APD	APD	APD	huref	DEU	huref	huref	APD	BTB	huref	APD	huref	F*01:01:01:11	DEU	G*01:03:01	A*31:01:02	huref	QBL	DEU	DEU	huref	APD	31227ABO	huref	MOU	MOU	E*01:03:02	huref	huref	huref	huref	huref	huref	huref	huref	huref	huref	huref	huref
DKB	huref	huref	huref	MCF	huref	AKIBA	huref	huref	BM21	huref	MCF	huref	APD	huref	APD	huref	huref	APD	APD	MOU	APD	huref	F*01:01:01:05	APD	G*01:01:02	A*24:02:01:01	huref	huref	huref	DKB	huref	APD	31227ABO	huref	MOU	MOU	E*01:01:01	APD	APD	huref	huref	huref	huref	huref	huref	huref	huref	huref	huref
DUCAF	huref	DUCAF	huref	MCF	huref	AKIBA	huref	huref	BM21	huref	MCF	huref	APD	huref	DEU	huref	huref	MCF	DUCAF	huref	APD	huref	F*01:01:01:01	huref	G*01:01:01	A*30:02:01:01	huref	huref	huref	MCF	huref	BM09	huref	huref	MOU	MOU	E*01:03:02	huref	huref	huref	DUCAF	huref	huref	huref	huref	DUCAF	DUCAF	DUCAF	huref
E481324	huref	COX	huref	MCF	huref	huref	huref	MCF	BM15	huref	APD	huref	SSTO	SSTO	SSTO	huref	huref	MCF	APD	APD	APD	huref	F*01:01:01:09	APD	G*01:06	A*01:01:01:01	huref	huref	huref	APD	huref	APD	APD	huref	huref	E481324	E*01:01:01	APD	APD	huref	huref	huref	huref	huref	huref	APD	huref	APD	huref
EA	het	het	het	het	het	het	het	het	het	het	het	het	het	het	het	het	het	het	het	het	het	het	het	het	het	het	het	het	het	het	het	het	het	het	het	het	het	het	het	het	het	het	het	het	het	het	het	het	het
EJ32B	huref	DUCAF	huref	MCF	huref	AKIBA	huref	huref	BM21	huref	MCF	huref	APD	huref	DEU	huref	huref	MCF	DUCAF	huref	APD	huref	F*01:01:01:01	huref	G*01:01:01	A*30:02:01:01	huref	huref	huref	MCF	huref	BM09	huref	huref	MOU	MOU	E*01:03:02	huref	huref	huref	EJ32B	huref	huref	huref	huref	DUCAF	DUCAF	DUCAF	huref
EK	huref	huref	huref	huref	huref	huref	huref	APD	APD	EK	APD	APD	DBB	huref	huref	huref	huref	huref	huref	huref	MCF	huref	F*01:01:01:01	huref	G*01:01:01	A*02:01:01:01	huref	huref	huref	MCF	MCF	APD	MCF	MCF	huref	MCF	E*01:01:01	APD	APD	huref	huref	huref	huref	huref	huref	huref	huref	huref	huref
FPAF	huref	COX	huref	FPAF	huref	huref	huref	FPAF	COX	huref	APD	huref	DBB	huref	huref	huref	huref	huref	huref	huref	APD	huref	F*01:01:01:09	APD	G*01:06	A*01:01:01:01	huref	huref	huref	APD	huref	APD	APD	huref	huref	APD	E*01:01:01	APD	APD	huref	huref	huref	huref	huref	huref	BM21	huref	APD	huref
HO104	huref	huref	huref	huref	huref	huref	huref	APD	APD	APD	APD	APD	DBB	huref	huref	huref	huref	huref	huref	huref	huref	huref	F*01:03	huref	G*01:01:01	A*03:01:01:01	huref	huref	huref	huref	huref	huref	huref	huref	huref	huref	E*01:03:02	huref	huref	huref	huref	huref	huref	huref	huref	huref	huref	huref	huref
HOR	huref	SSTO	huref	MCF	huref	AKIBA	huref	huref	BM21	huref	MCF	huref	APD	huref	APD	AKIBA	HOR	AKIBA	COX	huref	APD	huref	F*01:01:02:04	HOR	G*01:04:01	A*33:03:01	huref	QBL	AMA1	huref	huref	APD	huref	huref	huref	huref	E*01:03:01	huref	APD	huref	HOR	huref	huref	HOR	huref	huref	huref	HOR	huref
IBW9	huref	DUCAF	huref	MCF	huref	AKIBA	huref	huref	BM21	IBW9	APD	AKIBA	SSTO	SSTO	SSTO	huref	huref	MCF	APD	huref	APD	huref	F*01:01:02:02	IBW9	G*01:03:01	A*33:01:01	huref	QBL	IBW9	IBW9	huref	APD	huref	huref	huref	APD	E*01:01:01	APD	APD	huref	huref	huref	huref	huref	huref	huref	huref	huref	huref
ISH3	huref	COX	huref	FPAF	huref	huref	huref	FPAF	COX	huref	APD	AKIBA	DBB	huref	huref	huref	huref	huref	ISH3	huref	APD	huref	F*01:01:01:09	huref	G*01:04:01	A*24:02:01:01	huref	huref	huref	MOU	huref	APD	31227ABO	huref	MOU	MOU	E*01:01:01	APD	APD	huref	huref	huref	huref	huref	huref	huref	huref	huref	huref
JBUSH	huref	huref	huref	huref	huref	huref	huref	APD	APD	APD	APD	APD	SSTO	SSTO	SSTO	huref	huref	MCF	APD	huref	APD	huref	F*01:01:02:04	huref	G*01:01:12	A*32:01:01	huref	huref	huref	MCF	MCF	APD	MCF	MCF	huref	MCF	E*01:01:01	APD	APD	huref	huref	huref	huref	huref	huref	huref	huref	huref	huref
JESTHOM	huref	SSTO	huref	huref	huref	huref	huref	APD	APD	APD	APD	APD	APD	huref	APD	huref	huref	huref	huref	huref	MCF	huref	F*01:01:01:01	huref	G*01:01:01	A*02:01:01:01	huref	huref	huref	31227ABO	huref	APD	MCF	MCF	huref	MCF	E*01:01:01	APD	APD	huref	huref	huref	huref	huref	huref	SSTO	huref	JESTHOM	huref
JHAF	huref	huref	huref	JHAF	huref	huref	huref	APD	APD	APD	APD	APD	APD	huref	DEU	huref	huref	APD	BTB	huref	APD	huref	F*01:01:01:11	DEU	G*01:03:01	A*31:01:02	huref	QBL	DEU	COX	huref	APD	huref	huref	MOU	MOU	E*01:03:01	APD	APD	huref	huref	huref	huref	huref	huref	SSTO	huref	huref	huref
JO528239	huref	huref	huref	huref	huref	huref	huref	APD	APD	APD	APD	APD	SSTO	SSTO	SSTO	huref	huref	MCF	APD	APD	APD	huref	F*01:01:01:09	APD	G*01:06	A*01:01:01:01	huref	huref	huref	JO528239	huref	APD	huref	huref	huref	huref	E*01:01:01	APD	APD	huref	huref	huref	huref	huref	huref	APD	huref	APD	huref
JVM	huref	SSTO	huref	MCF	huref	huref	huref	FPAF	COX	huref	APD	huref	SSTO	AKIBA	AKIBA	AKIBA	AKIBA	MCF	APD	huref	MCF	huref	F*01:01:01:01	huref	G*01:01:01	A*02:01:01:01	huref	huref	huref	huref	huref	APD	APD	COX	MOU	MOU	E*01:03:02	huref	huref	huref	huref	huref	huref	huref	huref	huref	huref	huref	huref
JY	het	het	het	het	het	het	het	het	het	het	het	het	het	het	het	het	het	het	het	het	het	het	het	het	het	het	het	het	het	het	het	het	het	het	het	het	het	het	het	het	het	het	het	het	het	het	het	het	het
KAS011	huref	COX	huref	MCF	huref	huref	huref	MCF	BM15	huref	APD	huref	SSTO	SSTO	SSTO	huref	huref	MCF	APD	APD	APD	huref	F*01:01:01:09	APD	G*01:06	A*01:01:01:01	huref	huref	huref	APD	huref	APD	APD	huref	huref	APD	E*01:01:01	APD	APD	huref	huref	huref	huref	huref	huref	APD	huref	APD	huref
KAS116	huref	huref	huref	MCF	huref	AKIBA	huref	huref	BM21	huref	MCF	huref	APD	huref	APD	huref	huref	APD	APD	MOU	KAS116	huref	F*01:01:01:01	APD	G*01:01:02	A*24:02:01:01	huref	huref	huref	31227ABO	huref	APD	31227ABO	huref	MOU	MOU	E*01:03:02	huref	huref	huref	huref	huref	huref	huref	huref	huref	huref	huref	huref
KAWASAKI	huref	huref	huref	huref	huref	huref	huref	APD	APD	huref	SSTO	APD	SSTO	huref	huref	huref	huref	KAWASAKI	KAWASAKI	huref	APD	AKIBA	F*01:01:01:07	huref	G*01:04:01	A*24:02:01:01	huref	huref	huref	QBL	huref	APD	31227ABO	huref	MOU	APD	E*01:03:01	APD	APD	huref	AKIBA	huref	huref	huref	huref	huref	huref	huref	huref
KGU	huref	huref	huref	huref	huref	huref	huref	APD	APD	APD	MCF	MCF	APD	huref	APD	huref	huref	APD	BTB	huref	BM16	huref	F*01:01:02:01	KGU	G*01:01:03	A*11:01:01	huref	huref	huref	KGU	huref	APD	31227ABO	KGU	huref	MCF	E*01:01:01	APD	APD	huref	huref	huref	huref	huref	huref	huref	huref	huref	huref
KOSE	huref	huref	huref	huref	huref	huref	huref	APD	APD	APD	APD	APD	APD	huref	APD	huref	huref	APD	huref	huref	MCF	huref	F*01:01:01:01	huref	G*01:01:01	A*02:01:01:01	huref	huref	huref	MCF	MCF	APD	MCF	MCF	huref	MCF	E*01:01:01	APD	APD	KOSE	huref	huref	huref	huref	huref	huref	huref	huref	huref
KRC005	huref	huref	huref	huref	huref	huref	huref	APD	APD	APD	APD	APD	AMALA	SSTO	SSTO	huref	huref	MCF	APD	huref	MCF	huref	F*01:01:01:01	huref	G*01:01:01	A*02:12	huref	huref	huref	MCF	huref	APD	huref	AMALA	MOU	MOU	E*01:01:01	APD	APD	huref	huref	huref	huref	huref	huref	huref	huref	QBL	huref
L0541265	huref	COX	COX	huref	huref	huref	huref	APD	COX	huref	APD	COX	APD	huref	APD	huref	huref	COX	COX	huref	APD	huref	F*01:01:01:09	APD	G*01:01:02	A*01:01:01:01	huref	huref	huref	COX	huref	APD	huref	COX	huref	huref	E*01:01:01	COX	APD	huref	huref	huref	huref	huref	huref	COX	huref	huref	huref
L081785	het	het	het	het	het	het	het	het	het	het	het	het	het	het	het	het	het	het	het	het	het	het	het	het	het	het	het	het	het	het	het	het	het	het	het	het	het	het	het	het	het	het	het	het	het	het	het	het	het
LBF	huref	huref	huref	huref	huref	huref	huref	APD	APD	APD	MOU	APD	APD	huref	APD	huref	huref	APD	COX	huref	APD	huref	F*01:01:01:09	APD	G*01:05N	A*30:01:01	huref	QBL	AMA1	AMA1	huref	APD	LBF	COX	huref	APD	E*01:01:01	APD	APD	huref	huref	huref	huref	huref	huref	huref	huref	LBF	huref
LD2B	huref	huref	huref	huref	huref	huref	huref	APD	APD	APD	APD	APD	DBB	huref	huref	huref	huref	huref	huref	huref	huref	huref	F*01:03	huref	G*01:01:01	A*03:01:01:01	huref	huref	huref	huref	huref	huref	huref	huref	huref	huref	E*01:03:02	huref	huref	huref	huref	huref	huref	huref	huref	huref	huref	huref	huref
LKT3	huref	COX	huref	huref	huref	huref	huref	APD	APD	APD	APD	APD	APD	huref	APD	huref	huref	APD	BTB	huref	APD	huref	F*01:01:01:09	huref	G*01:04:01	A*24:02:01:01	huref	huref	huref	MOU	huref	APD	31227ABO	huref	MOU	MOU	E*01:01:01	APD	APD	huref	huref	huref	huref	huref	huref	huref	huref	huref	huref
LUY	het	het	het	het	het	het	het	het	het	het	het	het	het	het	het	het	het	het	het	het	het	het	het	het	het	het	het	het	het	het	het	het	het	het	het	het	het	het	het	het	het	het	het	het	het	het	het	het	het
LWAGS	het	het	het	het	het	het	het	het	het	het	het	het	het	het	het	het	het	het	APD	huref	APD	huref	F*01:01:02:03	IBW9	G*01:03:01	A*33:01:01	huref	QBL	IBW9	IBW9	huref	APD	huref	huref	huref	APD	E*01:01:01	APD	APD	huref	huref	huref	huref	huref	huref	huref	huref	huref	huref
LZL	huref	huref	huref	huref	huref	huref	huref	APD	APD	APD	APD	APD	AMALA	SSTO	SSTO	huref	huref	MCF	APD	huref	MCF	huref	F*01:01:01:01	huref	G*01:01:01	A*02:17:02	huref	huref	huref	MCF	huref	APD	huref	AMALA	huref	MCF	E*01:03:02	huref	huref	huref	huref	huref	huref	huref	huref	huref	huref	huref	huref
MADURA	huref	COX	huref	MCF	huref	huref	huref	MCF	BM15	huref	APD	huref	APD	huref	huref	huref	huref	MCF	APD	huref	MCF	MADURA	F*01:01:01:01	huref	G*01:01:01	A*02:01:01:01	huref	huref	huref	MCF	MCF	APD	MCF	MCF	huref	MCF	E*01:03:02	huref	huref	huref	huref	huref	huref	huref	huref	huref	huref	huref	huref
MANIKA	huref	SSTO	huref	MCF	huref	huref	huref	MCF	COX	huref	MCF	MCF	APD	huref	huref	huref	huref	MCF	BTB	huref	APD	MANIKA	F*01:03	huref	G*01:01:01	A*03:01:01:01	huref	huref	huref	huref	huref	APD	huref	huref	huref	huref	E*01:01:01	MANIKA	APD	huref	huref	huref	huref	huref	huref	huref	huref	MANIKA	huref
MCF	huref	huref	huref	MCF	huref	huref	huref	MCF	COX	huref	MCF	MCF	APD	huref	huref	huref	huref	MCF	APD	huref	MCF	huref	F*01:01:01:01	huref	G*01:01:01	A*02:01:01:01	huref	huref	huref	MCF	MCF	APD	MCF	MCF	huref	MCF	E*01:03:02	huref	huref	huref	huref	huref	huref	huref	huref	huref	huref	huref	huref
MGAR	huref	huref	huref	huref	huref	huref	huref	APD	APD	APD	APD	APD	DBB	huref	huref	huref	huref	huref	huref	huref	APD	huref	F*01:01:01:08	APD	G*01:01:02	A*26:01:01	QBL	QBL	QBL	QBL	huref	APD	huref	huref	huref	huref	E*01:03:02	huref	huref	huref	huref	huref	huref	huref	huref	huref	huref	MGAR	huref
MOU	huref	huref	huref	huref	huref	huref	huref	APD	APD	APD	MOU	APD	APD	huref	APD	huref	huref	APD	APD	MOU	APD	huref	F*01:01:01:08	huref	G*01:01:01	A*29:02:01:01	huref	huref	MOU	MOU	huref	APD	APD	COX	MOU	MOU	E*01:03:02	huref	huref	huref	huref	huref	huref	huref	huref	huref	huref	huref	huref
MT14B	het	het	huref	huref	huref	huref	huref	APD	APD	APD	APD	APD	APD	huref	DEU	huref	huref	APD	BTB	huref	APD	huref	F*01:01:01:11	HOR	G*01:03:01	A*31:01:02	huref	QBL	DEU	COX	MCF	APD	MCF	MCF	huref	MCF	E*01:03:02	huref	huref	huref	huref	huref	huref	huref	huref	huref	huref	huref	huref
MZ0707	het	het	het	het	het	het	het	het	het	het	het	het	het	het	het	het	het	het	het	het	het	het	het	het	het	het	het	het	het	het	het	het	het	het	het	het	het	het	het	het	het	het	het	het	het	het	het	het	het
OMW	huref	OMW	huref	MCF	huref	huref	huref	FPAF	COX	huref	APD	huref	DBB	huref	OMW	OMW	OMW	MCF	APD	huref	MCF	huref	F*01:01:01:01	huref	G*01:01:01	A*02:01:01:01	huref	huref	huref	OMW	huref	APD	APD	COX	MOU	MOU	E*01:03:02	huref	huref	huref	huref	huref	huref	huref	huref	huref	huref	huref	huref
PF04015	huref	COX	COX	huref	huref	huref	huref	APD	COX	huref	APD	COX	APD	huref	APD	huref	huref	COX	COX	huref	APD	huref	F*01:01:01:09	APD	G*01:01:02	A*01:01:01:01	huref	huref	huref	COX	huref	APD	huref	COX	huref	huref	E*01:01:01	COX	APD	huref	huref	huref	huref	huref	huref	COX	huref	huref	huref
PF97387	het	het	het	het	het	het	het	het	het	het	het	het	het	het	het	het	het	het	BTB	huref	APD	huref	F*01:01:01:08	huref	G*01:01:01	A*29:02:01:01	huref	huref	MOU	MOU	huref	APD	APD	COX	MOU	MOU	E*01:03:02	huref	huref	huref	huref	huref	huref	huref	huref	huref	huref	huref	huref
PGF	het	het	het	het	het	het	het	het	het	het	het	het	het	het	het	het	het	het	huref	huref	huref	huref	F*01:03	huref	G*01:01:01	A*03:01:01:01	huref	huref	huref	huref	huref	huref	huref	huref	huref	huref	E*01:03:02	huref	huref	huref	huref	huref	huref	huref	huref	huref	huref	huref	huref
PITOUT	huref	COX	huref	MCF	huref	AKIBA	huref	huref	huref	huref	huref	huref	huref	huref	huref	huref	huref	MCF	BTB	huref	APD	huref	F*01:01:01:08	huref	G*01:01:01	A*29:02:01:01	huref	huref	MOU	MOU	huref	APD	APD	COX	MOU	MOU	E*01:03:02	huref	huref	huref	huref	huref	huref	huref	huref	huref	huref	huref	huref
PLH	het	het	het	het	het	het	het	het	het	het	het	het	het	het	het	het	het	het	het	het	het	het	het	het	het	het	het	het	het	het	het	het	het	het	het	het	het	het	het	het	het	het	het	het	het	het	het	het	het
QBL	huref	COX	huref	huref	huref	huref	huref	APD	APD	APD	APD	APD	APD	huref	APD	huref	huref	APD	huref	huref	APD	huref	F*01:01:01:08	APD	G*01:01:02	A*26:01:01	QBL	QBL	QBL	QBL	huref	APD	huref	huref	QBL	APD	E*01:01:01	APD	APD	huref	huref	huref	huref	huref	QBL	QBL	huref	QBL	huref
RML	huref	huref	huref	FPAF	huref	huref	huref	FPAF	COX	huref	APD	huref	APD	huref	huref	huref	huref	MCF	huref	huref	APD	huref	F*01:01:01:09	huref	G*01:01:01	A*02:04	huref	huref	huref	MCF	MCF	APD	MCF	MCF	MOU	MOU	E*01:01:01	huref	huref	huref	huref	huref	huref	huref	huref	huref	huref	huref	huref
RSH	het	het	het	het	het	het	het	het	het	het	het	het	het	het	het	het	het	het	het	het	het	het	het	het	het	het	het	het	het	het	het	het	het	het	het	het	het	het	het	het	het	het	het	het	het	het	het	het	het
SA1	het	het	het	het	het	het	het	het	het	het	het	het	het	het	het	het	het	het	het	het	het	het	F*01:01:01:09	huref	G*01:04:01	A*24:02:01:01	huref	huref	huref	MOU	huref	APD	31227ABO	huref	MOU	MOU	het	het	het	het	het	het	het	het	het	het	het	het	het
SCHU	huref	huref	huref	huref	huref	huref	huref	APD	APD	APD	APD	APD	DBB	huref	huref	huref	huref	huref	huref	huref	huref	huref	F*01:03	huref	G*01:01:01	A*03:01:01:01	huref	huref	huref	huref	huref	huref	huref	huref	huref	huref	E*01:03:02	huref	huref	huref	huref	huref	huref	huref	huref	huref	huref	huref	huref
SLE005	het	het	huref	huref	huref	huref	huref	APD	APD	APD	APD	APD	APD	huref	APD	huref	huref	APD	BTB	SLE5	APD	SLE005	F*01:04	huref	G*01:01:01	A*02:01:01:01	huref	huref	huref	MCF	MCF	APD	MCF	MCF	huref	MCF	E*01:03:02	huref	huref	huref	huref	huref	huref	huref	huref	huref	huref	huref	huref
SP0010	huref	AWELLS	huref	huref	huref	huref	huref	APD	APD	APD	APD	APD	DBB	huref	huref	huref	huref	huref	huref	huref	MCF	huref	F*01:01:01:01	huref	G*01:01:01	A*02:01:01:01	huref	huref	huref	31227ABO	huref	AWELLS	huref	AWELLS	QBL	APD	E*01:01:01	APD	APD	huref	huref	huref	huref	huref	QBL	huref	huref	QBL	huref
SPL	huref	huref	huref	FPAF	huref	huref	huref	FPAF	COX	huref	APD	huref	SSTO	SSTO	SSTO	huref	huref	MCF	BTB	huref	APD	huref	F*01:01:01:11	DEU	G*01:03:01	A*31:01:02	huref	QBL	DEU	COX	huref	APD	huref	huref	MOU	MOU	E*01:01:01	huref	huref	huref	huref	huref	huref	huref	huref	huref	huref	SPL	huref
SSTO	huref	SSTO	huref	MCF	huref	huref	huref	APD	APD	APD	SSTO	COX	SSTO	SSTO	SSTO	huref	huref	MCF	APD	huref	APD	huref	F*01:01:02:06	huref	G*01:01:12	A*32:01:01	huref	huref	huref	MCF	MCF	APD	MCF	MCF	huref	MCF	E*01:01:01	APD	APD	huref	huref	huref	huref	huref	huref	SSTO	huref	SSTO	huref
STEINLIN	huref	COX	COX	huref	huref	huref	huref	APD	COX	huref	APD	COX	APD	huref	APD	huref	huref	COX	COX	huref	APD	huref	F*01:01:01:09	APD	G*01:01:02	A*01:01:01:01	huref	huref	huref	COX	huref	APD	huref	COX	huref	huref	E*01:01:01	COX	APD	huref	huref	huref	huref	huref	huref	COX	huref	huref	huref
SWEIG	het	het	het	het	het	het	het	het	het	het	het	het	het	het	het	het	het	het	het	het	het	het	het	het	het	het	het	het	het	het	het	het	het	het	het	het	het	het	het	het	het	het	het	het	het	het	het	het	het
T7526	het	het	het	het	het	het	het	het	het	het	het	het	het	het	het	het	het	het	het	het	het	het	het	het	het	het	het	het	het	het	het	het	het	het	het	het	het	het	het	het	het	het	het	het	het	het	het	het	het
TAB	het	het	het	het	het	het	het	het	het	het	het	het	het	het	het	het	het	het	het	het	het	het	het	het	het	het	het	het	het	het	het	het	het	het	het	het	het	het	het	het	het	het	het	het	het	het	het	het	het
TEM	huref	SSTO	huref	MCF	huref	huref	huref	MCF	COX	huref	APD	TEM	DBB	huref	OMW	AKIBA	OMW	MCF	COX	TEM	APD	TEM	F*01:01:01:08	APD	G*01:01:02	A*66:01:01	QBL	QBL	TEM	MOU	huref	APD	TEM	MCF	TEM	TEM	E*01:03:01	APD	APD	huref	huref	huref	huref	huref	huref	SSTO	huref	huref	huref
TISI	huref	SSTO	huref	MCF	huref	AKIBA	huref	huref	BM21	huref	APD	AKIBA	DBB	huref	huref	huref	huref	MCF	APD	MOU	APD	huref	F*01:01:01:05	APD	G*01:01:02	A*24:02:01:01	huref	huref	huref	31227ABO	huref	APD	31227ABO	huref	MOU	MOU	E*01:01:01	APD	APD	huref	TISI	huref	huref	huref	huref	huref	huref	QBL	huref
VAVY	huref	COX	COX	huref	huref	huref	huref	APD	COX	APD	APD	COX	APD	huref	APD	huref	huref	COX	COX	huref	APD	huref	F*01:01:01:09	APD	G*01:01:02	A*01:01:01:01	huref	huref	huref	COX	huref	APD	huref	COX	huref	huref	E*01:01:01	COX	APD	huref	huref	huref	huref	huref	huref	COX	huref	huref	huref
WAR	huref	huref	huref	FPAF	huref	huref	huref	FPAF	COX	huref	APD	huref	APD	huref	huref	huref	huref	MCF	huref	huref	APD	huref	F*01:01:01:09	huref	G*01:01:01	A*02:04	huref	huref	huref	MCF	MCF	APD	MCF	MCF	MOU	MOU	E*01:01:01	huref	huref	huref	huref	huref	huref	huref	huref	huref	huref	huref	huref
WDV	huref	huref	huref	huref	huref	huref	huref	APD	APD	APD	APD	APD	DBB	huref	huref	huref	huref	huref	APD	huref	MCF	huref	F*01:01:01:01	huref	G*01:01:01	A*02:01:01:01	huref	huref	huref	MCF	MCF	APD	MCF	MCF	huref	MCF	E*01:03:02	APD	APD	huref	huref	huref	huref	huref	QBL	huref	huref	QBL	huref
WIN197	het	het	het	het	het	het	het	het	het	het	het	het	het	het	het	het	het	MCF	APD	APD	APD	huref	F*01:01:01:09	APD	G*01:06	A*01:01:01:01	huref	huref	huref	APD	DBB	APD	APD	huref	huref	APD	E*01:01:01	APD	APD	huref	huref	huref	huref	huref	huref	APD	huref	APD	huref
WJR076D	het	het	het	het	het	het	het	het	het	het	het	het	het	het	het	het	het	het	APD	huref	MCF	huref	F*01:01:01:01	huref	G*01:01:01	A*02:01:01:01	huref	huref	huref	WJR076D	MCF	APD	MCF	MCF	huref	MCF	E*01:01:01	APD	APD	huref	huref	huref	huref	huref	huref	WJR076D	huref	huref	huref
WT100BIS	huref	huref	huref	MCF	huref	AKIBA	huref	huref	BM21	huref	MCF	huref	APD	huref	huref	huref	huref	MCF	huref	WT1BIS	APD	huref	F*01:01:02	KGU	G*01:01:03	A*11:01:01	huref	huref	huref	MOU	huref	APD	WT100BIS	huref	MOU	MOU	E*01:01:01	APD	APD	huref	huref	huref	huref	huref	huref	huref	huref	QBL	huref
WT24	huref	SSTO	huref	MCF	huref	huref	huref	APD	APD	APD	SSTO	APD	SSTO	SSTO	SSTO	huref	huref	MCF	APD	huref	MCF	huref	F*01:01:01:01	huref	G*01:01:01	A*02:01:01:01	huref	huref	huref	31227ABO	huref	APD	huref	COX	huref	huref	E*01:01:01	APD	APD	huref	huref	huref	huref	huref	QBL	huref	huref	QBL	huref
WT47D	huref	huref	huref	huref	huref	huref	huref	APD	APD	APD	APD	APD	DBB	huref	huref	huref	huref	huref	huref	huref	APD	huref	F*01:01:02:04	huref	G*01:01:12	A*32:01:01	huref	huref	huref	MCF	MCF	APD	MCF	MCF	huref	MCF	E*01:01:01	APD	APD	huref	huref	huref	huref	huref	huref	huref	huref	huref	huref
WT49	huref	COX	huref	MCF	huref	huref	huref	FPAF	COX	huref	MCF	MCF	APD	huref	huref	huref	huref	MCF	AKIBA	APD	APD	huref	F*01:01:02:03	DEU	G*01:03:01	A*02:05:01	WT49	huref	huref	WT49	WT49	APD	huref	MCF	huref	APD	E*01:03:01	huref	APD	huref	WT49	huref	huref	huref	huref	huref	huref	WT49	huref
WT51	huref	COX	huref	MCF	huref	AKIBA	huref	huref	huref	huref	huref	huref	huref	huref	huref	huref	huref	MCF	BTB	huref	APD	WT51	F*01:03:01:01	HOR	G*01:04:04	A*23:01:01	huref	huref	huref	MOU	huref	APD	huref	WT51	huref	APD	E*01:01:01	APD	APD	huref	huref	huref	huref	huref	huref	huref	huref	huref	huref
YAR	huref	huref	huref	huref	huref	huref	huref	APD	APD	APD	APD	APD	DBB	huref	huref	huref	huref	huref	huref	huref	APD	huref	F*01:01:01:08	APD	G*01:01:02	A*26:01:01	QBL	QBL	QBL	QBL	huref	APD	huref	huref	MOU	MOU	E*01:03:01	APD	APD	huref	huref	huref	huref	huref	huref	SSTO	huref	huref	huref
[truncated: 113 more columns]
