# Supplementary material for: Sequences of 95 humanMHChaplotypes reveal extreme coding variation in genes other than highly polymorphicHLA class IandII
Source: HighWire-hosted journal article supplement (doi:10.1101/gr.213538.116), 2017-03-30
Supplement: Supplemental_Table_S5.xlsx [file Supplemental_Table_S5.xlsx]

## Sheet: a_MUC22
	105	169	211	232	291	325	359	382	568	600	605	658	672	816	817	818	834	840	1024	1040	1045	1119	1204	1262	1370	1439	1457	1552	1581	1600	1698	1823	1900	1902	1938	1980	2000	2009	2035	2119	2354	2608	2674	2858	2954	3136	3147	3284	3312
huref	C	T	A	G	C	A	G	A	A	T	G	A	G	C	A	C	T	A	A	C	G	C	G	C	-	C	C	G	A	A	T	T	G	G	C	C	C	T	T	A	T	A	A	G	C	A	C	T	C
31227ABO	C	A	A	G	T	A	G	G	A	T	G	T	C	C	A	C	T	A	G	C	A	C	A	C	-	C	C	G	A	G	1860	-	-	-	-	-	-	-	-	-	-	-	-	-	-	-	-	-	-
AKIBA	T	A	A	G	C	A	G	G	A	T	G	A	G	C	A	C	T	A	A	C	A	C	A	C	-	C	T	A	A	A	T	T	G	G	C	C	C	T	T	A	T	G	A	G	C	G	C	T	C
AMA1	C	A	A	G	C	A	G	A	T	T	G	A	G	C	A	C	T	A	A	C	G	C	G	C	-	C	C	G	A	A	T	T	G	G	C	C	C	T	T	A	T	A	A	G	C	A	C	T	C
AMALA	C	A	A	G	T	G	G	G	A	T	G	A	G	C	A	C	T	A	A	C	G	C	G	C	-	C	C	G	C	A	T	T	G	G	C	C	C	T	T	A	T	A	A	G	C	A	C	T	C
APD	C	T	A	G	T	A	T	A	A	T	G	A	G	C	A	C	T	A	A	C	G	C	G	C	-	C	C	G	A	A	T	T	G	G	C	T	C	T	T	A	T	A	A	G	C	A	C	T	C
AWELLS	C	A	A	G	C	A	G	A	T	T	G	A	G	C	A	C	T	A	A	C	G	C	G	C	-	C	C	G	A	A	T	T	G	G	C	C	C	T	T	A	T	A	A	G	C	A	C	T	C
AZH	C	A	A	G	T	G	G	A	T	T	G	A	G	C	A	C	T	A	A	C	G	C	G	C	-	C	C	G	T	A	T	T	G	G	C	C	C	T	T	A	T	A	A	G	C	A	C	T	C
BEI	C	T	A	G	T	G	T	A	A	T	G	A	G	C	A	C	T	A	A	C	G	C	G	C	-	C	C	G	A	A	T	T	G	G	C	T	C	T	T	A	T	A	A	G	C	A	C	T	C
BGED	C	A	A	G	C	A	G	A	A	T	A	A	C	C	A	C	979	-	-	-	-	-	-	-	-	-	-	-	-	-	-	C	G	G	C	C	T	C	T	G	C	A	A	90	T	A	C	T	T
BH	C	A	A	G	C	G	G	A	T	T	G	A	G	C	A	C	T	A	A	C	G	C	G	C	-	C	C	G	A	A	T	T	G	G	C	C	C	T	T	A	T	A	A	G	C	A	C	T	C
BM09	C	A	A	G	C	A	G	A	A	T	G	T	C	T	G	A	1104	-	-	-	-	-	-	-	-	-	-	-	-	-	-	-	A	C	C	C	T	C	T	G	C	A	A	G	T	A	C	T	T
BM14	C	T	A	G	C	A	G	A	A	T	G	A	G	C	A	C	T	A	A	C	G	C	G	C	-	C	C	G	A	A	T	T	G	G	C	C	C	T	T	A	T	A	A	G	C	A	C	T	C
BM21	C	A	A	G	T	G	G	A	A	T	G	A	G	C	A	C	T	A	A	C	G	C	G	C	-	C	C	G	C	A	T	T	G	G	C	C	C	T	C	A	T	A	A	G	C	A	C	T	C
BTB	C	A	A	G	C	A	G	A	A	T	A	T	C	T	G	A	1104	-	-	-	-	-	-	-	-	-	-	-	-	-	-	-	A	C	C	C	T	C	T	G	C	A	A	G	T	A	C	T	T
CALOGERO	C	A	A	G	T	G	G	A	T	T	G	A	G	C	A	C	T	A	A	C	G	C	G	C	-	C	C	G	T	A	T	T	G	G	C	C	C	T	T	A	T	A	A	G	C	A	C	T	C
CB6B	C	A	A	G	T	G	G	A	T	T	G	A	G	C	A	C	T	A	A	C	G	C	G	C	-	C	C	G	T	A	T	T	G	G	C	C	C	T	T	A	T	A	A	G	C	A	C	T	C
COX	T	A	A	G	T	G	G	A	A	T	G	A	G	C	A	C	T	A	A	C	G	C	G	C	-	C	C	G	A	A	T	T	G	G	C	C	C	T	T	A	T	A	A	G	C	A	C	T	C
DEU	C	A	A	G	T	G	G	A	T	T	G	A	G	C	A	C	T	A	A	C	G	C	G	C	-	C	C	G	T	A	T	T	G	G	C	C	C	T	T	A	T	A	A	G	C	A	C	T	C
EK	C	T	A	G	T	A	T	A	A	T	G	A	G	C	A	C	T	A	A	G	A	C	G	C	-	C	C	G	A	A	T	T	G	G	C	C	C	T	T	A	T	A	A	G	C	A	C	T	C
FPAF	C	A	A	G	C	A	G	A	A	T	A	T	C	T	G	A	1104	-	-	-	-	-	-	-	-	-	-	-	-	-	-	-	A	C	C	C	T	C	T	G	C	A	A	G	T	A	C	T	T
HOR	C	A	G	G	C	G	G	A	A	T	G	A	G	C	A	C	T	A	G	G	A	C	A	C	-	C	C	G	A	G	1860	-	-	-	-	-	-	-	-	-	-	-	-	-	-	-	-	-	-
IBW9	C	A	A	A	T	A	G	A	A	T	G	A	G	C	A	C	T	A	A	C	G	C	G	G	-	G	C	G	A	A	T	T	G	G	C	C	C	T	T	A	T	A	A	G	C	A	C	T	C
JBUSH	C	A	A	G	T	G	G	A	T	T	G	A	G	C	A	C	T	A	A	C	G	T	G	C	-	C	C	G	A	A	T	T	G	G	C	C	C	T	T	A	T	A	A	G	C	A	C	T	C
KAS011	C	T	A	G	T	G	G	A	A	T	G	A	G	C	A	C	T	A	A	C	G	C	G	C	-	C	C	G	A	A	T	T	G	G	C	T	C	T	T	A	T	A	A	G	C	A	C	T	C
KAS116	C	A	A	G	T	A	G	G	A	T	G	A	G	C	A	C	T	A	A	C	G	T	G	C	-	C	C	G	A	A	T	T	G	G	C	C	C	T	T	A	T	A	A	G	C	A	T	T	C
KGU	C	A	A	G	C	A	G	A	A	T	A	T	C	T	G	A	1104	-	-	-	-	-	-	-	-	-	-	-	-	-	-	-	A	C	C	C	T	C	T	G	C	A	A	G	T	A	C	T	T
LKT3	C	T	A	G	T	A	T	A	A	T	G	A	G	C	A	C	T	A	A	C	G	C	G	C	-	C	C	G	A	A	T	T	G	G	C	C	C	T	T	A	T	A	A	G	C	A	C	T	C
MANIKA	C	A	A	G	C	G	G	A	A	C	G	A	G	C	A	C	T	A	A	C	G	C	G	C	-	C	C	G	C	A	T	T	G	G	C	C	C	T	T	A	T	A	A	G	C	A	C	T	C
MCF	C	A	A	G	T	G	G	G	A	T	G	A	G	C	A	C	T	A	A	C	G	C	G	C	-	C	C	G	C	A	T	T	G	G	C	C	C	T	T	A	T	A	A	G	C	A	C	T	C
MOU	C	A	A	G	T	G	G	A	A	T	G	A	G	C	A	C	T	A	A	C	G	C	G	C	-	C	C	G	A	A	T	T	G	G	C	C	C	T	T	A	T	A	A	G	C	A	C	T	C
PLH	C	A	A	G	T	G	G	A	A	T	G	A	G	C	A	C	T	A	A	C	G	C	G	C	-	C	C	G	A	A	T	T	G	G	C	C	C	T	T	A	T	A	A	G	C	A	C	T	C
QBL	C	A	A	G	C	G	G	A	A	T	G	A	G	C	A	C	T	A	A	C	G	C	G	C	-	C	C	G	A	A	T	T	G	G	C	C	C	T	T	A	T	A	A	G	C	A	C	T	C
RML	C	A	A	G	C	A	G	A	A	T	A	T	C	T	G	A	1104	-	-	-	-	-	-	-	-	-	-	-	-	-	-	-	A	C	C	C	T	C	T	G	C	A	A	G	T	A	C	C	T
RSH	T	A	A	G	C	G	T	A	A	T	G	A	G	C	A	C	T	A	A	C	G	C	G	C	-	C	C	G	A	A	T	T	G	G	1	C	C	T	T	A	T	A	A	G	C	A	C	T	C
SA1	C	T	A	G	T	A	T	A	A	T	G	A	G	C	A	C	T	A	A	C	G	C	G	C	-	C	C	G	A	A	T	T	G	G	C	C	C	T	T	A	T	A	A	G	C	A	C	T	C
SPL	C	A	A	G	C	A	G	A	A	T	G	A	G	C	A	C	T	A	A	C	A	C	A	C	-	C	T	A	A	A	T	T	G	G	C	C	C	T	T	A	T	G	G	G	C	G	C	T	C
SSTO	C	A	A	G	C	A	G	A	A	T	G	A	G	C	A	C	T	A	A	G	A	C	G	C	-	C	C	G	A	A	T	T	G	G	C	C	C	T	T	A	T	A	A	G	C	A	C	T	C
TISI	C	A	A	G	T	G	G	G	A	T	G	A	G	C	A	C	T	T	A	C	G	T	G	C	-	C	C	G	A	A	T	T	G	G	C	C	C	T	T	A	T	A	A	G	C	A	C	T	C
WJR076D	C	A	A	G	T	G	G	A	A	T	G	A	G	C	A	C	T	A	A	C	G	C	G	C	-	C	C	G	C	A	T	T	G	G	C	C	C	T	T	A	T	A	A	G	C	A	C	T	C
WT24	C	A	A	G	C	A	G	A	A	T	G	A	G	C	A	C	T	A	A	C	G	C	G	C	-	C	C	G	A	A	T	T	G	G	C	C	C	T	T	A	T	A	A	G	C	A	C	T	C
WT49	C	A	A	G	T	A	G	A	T	T	G	A	G	T	G	A	T	A	A	C	G	C	G	C	30	C	C	G	A	A	T	T	G	G	C	C	C	T	T	A	T	A	A	G	C	A	C	T	C
WT51	C	A	A	A	C	G	G	A	A	T	G	A	G	C	A	C	T	T	A	C	G	T	G	C	-	C	C	G	A	A	T	T	G	G	C	C	C	T	T	A	T	A	A	G	C	A	C	T	C
[truncated: 20 more columns]

## Sheet: b_NOTCH4
	allele		36	37	38	39	40	41	42	43	44	45	46	47	48	49	50	51	52	53	54	55	56	164	264	342	358	531	567	620	654	740	748	822	824	861	967	1053	1220	1587	1609	1626	1875	2061	2277	2513	2833	2976	3897
			L			L			L			L			L			L			L			Q			Q			P		S	G		D		A		D		G					G	G
		STR Rpt	-			-			-			-			-			-			-			R			K			L		L	R		G		T		V		S					V	R
1	BER	(13R)	G	C	T	G	C	T	G	C	T	G	C	T	G	C	T	G	C	T	G	C	T	A	C	C	C	A	C	C	G	C	G	A	A	G	G	C	A	G	G	C	G	G	T	G	G	C	C
2	LWAGS	(6R)	-	-	-	-	-	-	-	-	-	-	-	-	-	-	-	-	-	-	-	-	-	A	C	C	C	A	C	C	G	C	G	A	A	G	A	C	A	G	G	C	G	G	T	G	G	C	C
3	BM16		-	-	-	-	-	-	-	-	-	-	-	-	-	-	-	-	-	-	-	-	-	A	C	T	A	G	C	C	G	C	G	G	G	A	G	G	A	G	G	C	G	G	T	G	G	C	C
4	MADURA		-	-	-	-	-	-	-	-	-	-	-	-	-	-	-	-	-	-	-	-	-	A	T	T	A	A	C	C	G	C	G	A	A	G	A	C	T	G	G	C	G	G	T	G	G	C	C
5	WJR076D		-	-	-	-	-	-	-	-	-	-	-	-	-	-	-	-	-	-	-	-	-	A	T	T	A	G	C	C	G	C	G	G	G	A	G	G	A	G	G	C	G	G	T	G	G	C	C
6	IBW9	(9R)	G	C	T	G	C	T	G	C	T	-	-	-	-	-	-	-	-	-	-	-	-	A	C	C	A	G	C	C	G	C	G	G	G	A	G	G	A	G	G	C	G	G	G	G	G	C	C
7	MOU		G	C	T	G	C	T	G	C	T	-	-	-	-	-	-	-	-	-	-	-	-	A	C	C	C	A	C	C	G	C	G	A	A	G	A	C	A	G	G	C	G	G	T	G	G	C	C
8	WDV		G	C	T	G	C	T	G	C	T	-	-	-	-	-	-	-	-	-	-	-	-	A	C	C	C	A	C	C	G	C	G	A	A	G	A	C	A	G	G	C	G	G	T	G	G	C	C
9	BM15		G	C	T	G	C	T	G	C	T	-	-	-	-	-	-	-	-	-	-	-	-	A	C	C	C	A	C	C	G	C	G	A	A	G	A	C	A	G	G	C	G	G	T	G	G	C	C
10	OMW		G	C	T	G	C	T	G	C	T	-	-	-	-	-	-	-	-	-	-	-	-	A	C	C	C	A	C	C	G	C	G	A	A	G	A	C	A	G	G	T	G	G	T	G	G	C	C
11	BEI		G	C	T	G	C	T	G	C	T	-	-	-	-	-	-	-	-	-	-	-	-	A	C	C	C	G	C	C	G	C	G	G	G	A	G	G	A	G	A	C	G	G	T	G	G	C	C
12	HOR		G	C	T	G	C	T	G	C	T	-	-	-	-	-	-	-	-	-	-	-	-	A	C	C	C	G	C	C	G	C	G	G	G	A	G	G	A	G	G	C	G	G	T	G	G	C	C
13	RSH		G	C	T	G	C	T	G	C	T	-	-	-	-	-	-	-	-	-	-	-	-	A	C	T	A	A	C	C	G	C	G	A	A	G	A	C	A	A	G	C	G	G	T	G	G	C	C
14	CALOGERO		G	C	T	G	C	T	G	C	T	-	-	-	-	-	-	-	-	-	-	-	-	A	C	T	A	A	C	C	G	C	G	A	A	G	A	C	A	G	G	C	G	G	T	G	G	C	C
15	JESTHOM		G	C	T	G	C	T	G	C	T	-	-	-	-	-	-	-	-	-	-	-	-	A	C	T	A	G	C	C	G	C	G	G	G	A	G	G	A	G	G	C	G	G	T	G	G	C	C
16	WT51		G	C	T	G	C	T	G	C	T	-	-	-	-	-	-	-	-	-	-	-	-	A	T	T	A	A	C	C	G	C	G	A	A	G	A	C	A	G	G	C	G	G	T	G	G	C	C
17	31227ABO		G	C	T	G	C	T	G	C	T	-	-	-	-	-	-	-	-	-	-	-	-	A	T	T	A	A	C	C	G	T	G	A	A	G	A	C	A	G	G	C	G	G	T	G	G	C	C
18	EK		G	C	T	G	C	T	G	C	T	-	-	-	-	-	-	-	-	-	-	-	-	A	T	T	A	G	C	C	G	C	G	G	G	A	G	G	A	G	G	C	G	G	T	G	G	C	C
19	huref	(10R)	G	C	T	G	C	T	G	C	T	G	C	T	-	-	-	-	-	-	-	-	-	A	C	T	A	A	C	C	G	C	G	A	A	G	A	C	A	G	G	C	G	G	T	G	G	A	C
20	WT49		G	C	T	G	C	T	G	C	T	G	C	T	-	-	-	-	-	-	-	-	-	A	C	C	A	G	C	C	G	C	C	G	G	A	G	G	A	G	G	C	G	G	T	G	G	C	C
21	AKIBA		G	C	T	G	C	T	G	C	T	G	C	T	-	-	-	-	-	-	-	-	-	A	C	C	C	A	C	C	G	C	G	A	A	G	A	C	A	G	G	C	G	G	T	G	G	C	C
22	MCF		G	C	T	G	C	T	G	C	T	G	C	T	-	-	-	-	-	-	-	-	-	A	C	C	C	A	C	C	G	C	G	A	A	G	A	C	A	G	G	C	G	G	T	G	G	C	T
23	KGU		G	C	T	G	C	T	G	C	T	G	C	T	-	-	-	-	-	-	-	-	-	A	T	T	A	A	C	C	G	C	G	A	A	G	A	C	A	G	G	C	G	G	T	G	G	C	C
24	AMALA		G	C	T	G	C	T	G	C	T	G	C	T	-	-	-	-	-	-	-	-	-	A	C	T	A	A	C	C	G	C	G	A	A	G	A	C	A	G	G	C	G	G	T	G	G	C	C
25	SWEIG		G	C	T	G	C	T	G	C	T	G	C	T	-	-	-	-	-	-	-	-	-	A	C	T	A	G	C	C	G	C	G	G	G	A	G	G	A	G	G	C	G	G	T	G	G	C	C
26	AZH		G	C	T	G	C	T	G	C	T	G	C	T	-	-	-	-	-	-	-	-	-	A	C	T	C	G	C	C	G	C	G	G	G	A	G	G	A	G	G	C	G	G	T	G	G	C	C
27	LKT3		G	C	T	G	C	T	G	C	T	G	C	T	-	-	-	-	-	-	-	-	-	A	C	C	C	G	T	T	A	C	G	G	A	G	A	G	A	G	G	C	A	A	T	G	G	C	C
28	DUCAF		G	C	T	G	C	T	G	C	T	G	C	T	-	-	-	-	-	-	-	-	-	A	T	T	A	A	C	C	G	C	G	A	A	G	A	C	A	G	G	C	G	G	T	T	G	C	C
29	DEU		G	C	T	G	C	T	G	C	T	G	C	T	-	-	-	-	-	-	-	-	-	G	C	T	A	A	C	C	G	C	G	A	A	G	A	C	A	G	G	C	G	G	T	G	G	C	C
30	APD	(11R)	G	C	T	G	C	T	G	C	T	G	C	T	G	C	T	-	-	-	-	-	-	A	C	T	A	G	C	C	G	C	G	G	G	A	G	G	A	G	G	C	G	G	T	G	G	C	C
31	TAB		G	C	T	G	C	T	G	C	T	G	C	T	G	C	T	-	-	-	-	-	-	A	T	T	A	A	C	C	G	C	G	A	A	G	A	C	A	G	G	C	G	G	T	G	A	C	C
32	PLH	(12R)	G	C	T	G	C	T	G	C	T	G	C	T	G	C	T	G	C	T	-	-	-	A	C	C	A	A	C	C	G	C	G	A	A	G	A	C	A	G	G	C	G	G	T	G	G	C	C
33	COX		G	C	T	G	C	T	G	C	T	G	C	T	G	C	T	G	C	T	-	-	-	A	C	C	C	A	C	C	G	C	G	A	A	G	G	C	A	G	G	C	G	G	T	G	G	C	C
34	AMA1		G	C	T	G	C	T	G	C	T	G	C	T	G	C	T	G	C	T	-	-	-	A	T	T	A	A	C	C	G	C	G	A	A	G	A	C	A	G	G	C	G	G	T	G	G	C	C
[truncated: 10 more columns]

## Sheet: c_NOTCH4_vsDorak
cell line	STR copy number in homozygous cell
	Current study	Dorak et al. 2006		HLA-DRB1	HLA-DRB1
31227ABO	9	nt		DRB1*14:54:01	DRB1*14:54:01
AKIBA	10	10		DRB1*15:02:01	DRB1*15:02:01
AMA1	11	nt		DRB1*15:03:01:01	DRB1*15:03:01:01
AMALA	10	10		DRB1*03:02:01	DRB1*03:02:01
APD	11	11		DRB1*13:01:01	DRB1*13:01:01
AWELLS	10	10		DRB1*11:01:01	DRB1*11:01:01
AZH	10	nt		DRB1*16:01:01	DRB1*16:01:01
BEI	9	nt		DRB1*07:01:01:01	DRB1*07:01:01:01
BER	13	13		DRB1*07:01:01:01	DRB1*07:01:01:01
BGED	11	nt		DRB1*15:02:01	DRB1*15:02:01
BH	13	13		DRB1*07:01:01:01	DRB1*07:01:01:01
BM09	10	10		DRB1*08:01:01	DRB1*08:01:01
BM14	10	nt		DRB1*04:01:01	DRB1*04:01:01
BM15	9	9		DRB1*11:02:01	DRB1*11:02:01
BM16	6	9		DRB1*12:01:01	DRB1*12:01:01
BM21	11	nt		DRB1*11:01:01	DRB1*11:01:01
BOLETH	10	10		DRB1*04:01:01	DRB1*04:01:01
BSM	10	10		DRB1*04:01:01	DRB1*04:01:01
BTB	10	nt		DRB1*08:01:01	DRB1*08:01:01
CALOGERO	9	nt		DRB1*16:01:01	DRB1*16:01:01
CB6B	10	10		DRB1*13:01:01	DRB1*13:01:01
COX	12	12		DRB1*03:01:01:01	DRB1*03:01:01:01
DBB	9	9		DRB1*07:01:01:01	DRB1*07:01:01:01
DEMD	het	nt		DRB1*04:01:01	DRB1*16:02:01
DEU	10	nt		DRB1*04:01:01	DRB1*04:01:01
DKB	10	10		DRB1*09:01:02	DRB1*09:01:02
DUCAF	10	10		DRB1*03:01:01:01	DRB1*03:01:01:01
E481324	10	10		DRB1*15:02:01	DRB1*15:02:01
EA	10	10		DRB1*15:01:01:01	DRB1*15:01:01:01
EJ32B	10	10		DRB1*03:01:01:01	DRB1*03:01:01:01
EK	9	9		DRB1*14:54:01	DRB1*14:54:01
FPAF	11	11		DRB1*11:04:01	DRB1*11:04:01
HO104	10	10		DRB1*15:01:01:01	DRB1*15:01:01:01
HOR	9	6		DRB1*13:02:01	DRB1*13:02:01
IBW9	9	nt		DRB1*07:01:01:01	DRB1*07:01:01:01
ISH3	10	nt		DRB1*04:06:01	DRB1*04:06:01
JBUSH	11	nt		DRB1*11:01:01	DRB1*11:01:01
JESTHOM	9	9		DRB1*01:01:01	DRB1*01:01:01
JHAF	10	10		DRB1*04:07:01	DRB1*04:07:01
JO528239	11	11		DRB1*11:02:01	DRB1*11:02:01
JVM	10	10		DRB1*11:02:01	DRB1*11:02:01
JY	het	nt		DRB1*04:01:01	DRB1*13:01:01
KAS011	9	9		DRB1*16:01:01	DRB1*16:01:01
KAS116	10	10		DRB1*01:01:01	DRB1*01:01:01
KAWASAKI	10	10		DRB1*15:02:01	DRB1*15:02:01
KGU	10	nt		DRB1*14:04	DRB1*14:04
KOSE	het	nt		DRB1*13:02:01	DRB1*14:54:01
KRC005	9	nt		DRB1*08:01:01	DRB1*08:01:01
L0541265	12	nt		DRB1*03:01:01:01	DRB1*03:01:01:01
L081785	10	10		DRB1*03:01:01:01	DRB1*03:01:01:01
LBF	13	13		DRB1*07:01:01:01	DRB1*07:01:01:01
LD2B	10	nt		DRB1*15:01:01:01	DRB1*15:01:01:01
LKT3	10	10		DRB1*04:01:01	DRB1*04:01:01
LUY	6	6		DRB1*08:03:02	DRB1*08:03:02
LWAGS	6	6		DRB1*01:02:01	DRB1*01:02:01
LZL	10	nt		DRB1*14:02:01	DRB1*14:02:01
MADURA	6	6		DRB1*08:01:01	DRB1*08:01:01
MANIKA	het	nt		DRB1*07:01:01:01	DRB1*07:01:01:01
MCF	10	nt		DRB1*04:01:01	DRB1*04:01:01
MGAR	10	10		DRB1*15:01:01:01	DRB1*15:01:01:01
MOU	9	9		DRB1*07:01:01:01	DRB1*07:01:01:01
MT14B	10	10		DRB1*04:04:01	DRB1*04:04:01
MZ0707	6	6		DRB1*01:02:01	DRB1*01:02:01
OMW	9	9		DRB1*13:01:01	DRB1*13:01:01
PF04015	12	12		DRB1*03:01:01:01	DRB1*03:01:01:01
PF97387	het	nt		DRB1*04:01:01	DRB1*04:01:01
PGF	10	10		DRB1*15:01:01:01	DRB1*15:01:01:01
PITOUT	9	9		DRB1*07:01:01:01	DRB1*07:01:01:01
PLH	12	12		DRB1*07:01:01:01	DRB1*07:01:01:01
QBL	10	10		DRB1*03:01:01:01	DRB1*03:01:01:01
RML	10	10		DRB1*16:02:01	DRB1*16:02:01
RSH	9	9		DRB1*03:02:01	DRB1*03:02:01
SA1	6	6		DRB1*01:01:01	DRB1*01:01:01
SCHU	10	nt		DRB1*15:01:01:01	DRB1*15:01:01:01
SLE005	10	10		DRB1*13:02:01	DRB1*13:02:01
SP0010	9	9		DRB1*04:01:01	DRB1*04:01:01
SPL	9	nt		DRB1*08	DRB1*08
SSTO	10	10		DRB1*04:03:01	DRB1*04:03:01
STEINLIN	12	nt		DRB1*03:01:01:01	DRB1*03:01:01:01
SWEIG	10	11		DRB1*11:01:01	DRB1*11:01:01
T7526	9	9		DRB1*09:01:02	DRB1*09:01:02
TAB	11	11		DRB1*08:03:02	DRB1*08:03:02
TEM	10	nt		DRB1*14:01:01	DRB1*14:01:01
TISI	11	11		DRB1*11:03	DRB1*11:03
VAVY	12	nt		DRB1*03:01:01:01	DRB1*03:01:01:01
WAR	10	nt		DRB1*16:02:01	DRB1*16:02:01
WDV	9	nt		DRB1*13:01:01	DRB1*13:01:01
WIN197	het	nt		DRB1*07:01:01:01	DRB1*07:01:01:01
WJR076D	6	6		DRB1*16:02:01	DRB1*16:02:01
WT100BIS	6	6		DRB1*01:01:01	DRB1*01:01:01
WT24	9	9		DRB1*16:01:01	DRB1*16:01:01
WT47D	10	nt		DRB1*13:02:01	DRB1*13:02:01
WT49	10	nt		DRB1*03:01:01:01	DRB1*03:01:01:01
WT51	9	nt		DRB1*04:01:01	DRB1*04:01:01
YAR	6	6		DRB1*04:02:01	DRB1*04:02:01
	het = hetrozygous	nt = not tested

## Sheet: d_C4
								traditional C4 d-region complement type										Additional information from full sequence
								rs147162052		C4A	C4B	rs17874654		exon 28	exon 28							rs9296005	rs392610	rs2229407					rs2229405							rs201969273	rs774945011	rs429329	rs771445680		rs566863170	rs140362734		s760602547	rs368403366	rs201016130		rs151124738
							CDS pos	3218				3527						156	171	246	402	421	1040	1278	1429	1445	1464	1485	1646	1799	2040	2140	2177	2186	2415	2475	2684	2719	2811	2877	2956	3285	3357		3735	3856	4237	4269	4485
							Codon (ATG=1)	1073		1120		1176		1207				52	57	82	134	141	347	426	477	482	488	495	549	600	680	714	726	729	805	825	895	907	937	963	986	1095	1119	1233	1245	1286	1413	1423	1495
							Amino Acid	D	G	PCLD	LSIH	N	S	VL	AR			syn	syn	syn	syn	L	S	syn	R	P	syn	syn	H	A	syn	R	P	R	syn	syn	R	A	syn	N	syn	syn	D	Q	syn	S	A	syn	syn
							epitope (single)		ch5		ch4	Rg3	ch6	Rg1	ch1							V	Y		W	R			P	V		S	L	Q			Q	T		H			E	*		A	P
												Rg2		Rg2			Ref allele	G	C	C	C	C	C	C	C	C	T	C	A	C	C	C	C	G	G	C	G	G	G	A	T	C	C		G	G	G	T	C
	Wu J Immunol 2007; 179		Current study				epitope (combo)		ch2		ch2						Alt allele	C	T	T	T	G	A	T	T	G	C	T	C	T	T	A	T	A	A	T	A	A	A	C	C	A	A	CT	A	T	C	C	T
Cell line	AB type	LS type	C4 copies	C4A/B ratio	AB type	LS type							ch3		ch3
31227ABO	AAB	LLL	3	2.80556	AAB	LLL		.	.	.	.	.	.	.	.			.	.	.	.	.	A	.	.	.	.	Y	.	.	.	.	.	.	.	.	.	.	.	.	.	.	.	.	R	.	.	.	.
AKIBA			2	A	AA	LL		.	.	.		.	.	.				.	.	.	.	.	.	.	.	.	.	.	.	.	.	.	.	.	.	Y	.	R	.	.	.	.	.	.	.	T	.	.	.
AMA1	AB	LS	2	1.59259	AB	LS		.	.	.	.	.		.	.			.	.	.	.	.	.	.	.	.	.	.	.	.	.	.	.	.	.	.	.	.	.	.	.	.	.	.	.	.	.	.	.
AMALA	ABB	LLL	3	0.194444	ABB	LLL		.	.	.	.	.	.		.			.	.	.	.	.	A	.	.	.	.	.	.	.	.	.	.	.	.	.	.	.	.	.	.	.	.	.	R	.	.	.	.
APD			2	0.83871	AB	LL		.	.	.	.	.	.	.	.			.	.	.	Y	.	A	.	.	.	.	.	.	.	.	.	.	.	.	.	.	.	.	.	.	.	.	.	R	.	.	.	.
AWELLS			2	1.09804	AB	LS		.		.	.	.	.	.	.			.	.	.	.	S	M	.	.	.	.	.	M	.	.	.	.	.	.	.	.	.	.	.	.	.	.	.	.	.	.	.	.
AZH			2	0.902439	AB	LL		.	.	.	.	.	.	.	.			.	.	.	.	.	A	.	.	.	.	.	.	.	.	.	.	.	.	.	.	.	.	.	.	.	.	.	A	.	.	.	.
BEI			2	1.01739	AB	LS		.	.	.	.		.	.	.			.	.	Y	.	.	M	.	Y	.	.	.	.	.	.	.	.	.	.	.	.	.	.	.	.	.	.	.	.	.	.	.	.
BER			2	1.64706	AB	LS		.	.	.	.		.	.	.			.	.	.	.	.	M	.	.	.	.	.	.	.	.	.	.	.	.	.	.	.	.	.	.	.	.	.	.	.	.	C	.
BGED			2	0.547368	ABB	LLL		.	.	.	.	.	.	.	.			.	.	.	.	.	.	.	.	.	.	.	.	.	.	.	.	.	.	Y	.	R	.	.	.	.	.	.	.	K	.	.	.
BH			2	1.0303	AB	LS		.	.	.	.		.	.	.			.	.	.	.	.	M	.	.	.	.	.	.	.	.	.	.	.	.	.	.	.	.	.	.	.	.	.	.	.	.	C	.
BM09	B	L	1	B	B	L			.		.	.			.			.	.	.	.	.	A	.	.	.	.	.	.	.	.	.	.	.	.	.	.	.	.	.	.	.	.	.	A	.	.	.	.
BM14	AB	LS	2	1.04762	AB	LS		.		.	.	.	.	.	.			.	.	.	.	S	M	.	.	.	.	.	M	.	.	.	.	.	.	.	.	.	.	.	.	.	.	.	.	.	.	.	.
BM15	AB	LS	2	1.33333	AB	LS		.	.	.	.	.	.	.	.			.	.	.	.	.	M	.	.	.	.	.	.	.	Y	.	.	.	.	.	.	.	.	.	.	M	.	.	.	.	.	.	.
BM16	AB	LS	3	0.827586	AAB	LLS		.	.	.	.	.	.	.	.			.	.	.	.	.	.	.	.	.	.	.	.	.	.	.	.	.	.	Y	.	R	.	.	.	.	.	.	.	K	.	.	.
BM21	AB	LS	2	1.2	AB	LS		.		.	.	.		.	.			.	Y	.	.	S	M	.	.	.	.	.	M	.	.	.	.	R	.	.	.	.	.	.	.	.	.	.	.	.	.	.	.
BOLETH	AB	LL	2	1.5	AB	LL		.	.	.	.	.	.	.	.			.	.	.	.	.	A	.	.	.	.	.	.	.	.	M	.	.	.	.	.	.	.	.	.	.	.	.	R	.	.	.	.
BSM	AB	LL	2	1.76923	AB	LL		.	.	.	.	.	.	.	.			.	.	.	.	.	A	.	.	.	.	.	.	.	.	M	.	.	.	.	.	.	.	.	.	.	.	.	R	.	.	.	.
BTB			2	1.24	AB	LL		.		.	.	.	.	.	.			.	.	.	.	.	A	.	.	.	.	Y	.	.	.	.	.	.	.	.	.	.	.	.	.	.	.	.	R	.	.	.	.
CALOGERO	AB	LL	2	2.19048	AB	LL		.	.	.	.	.	.	.	.			.	.	.	.	.	A	.	.	.	.	Y	.	.	.	.	.	.	.	.	.	.	.	.	.	.	.	.	.	.	.	.	.
CB6B	AABB	LLLS	4	0.87619	AABB	LLLS		.	.	.	.	.	.	.	.			.	.	.	.	.	.	T	.	.	.	.	.	.	.	.	.	.	.	.	.	.	.	.	.	.	.	.	.	.	.	.	.
COX	B	S	1	B	B	S			.		.	.			.			.	.	.	.	.	.	.	.	.	.	.	.	.	.	.	.	.	.	T	.	A	.	.	.	.	.	.	.	.	.	.	.
DBB	AB	LS	2	1.28889	AB	LS		.	.	.	.		.	.	.			.	.	Y	.	.	M	.	Y	.	.	.	.	.	.	.	.	.	.	.	.	.	.	.	.	.	.	.	.	.	.	.	.
DEMD			2	1.04545	AB	LS		.	.	.	.		.	.	.			.	.	Y	.	.	M	.	Y	.	.	.	.	.	.	.	.	.	.	.	.	.	.	.	.	.	.	.	.	.	.	.	.
DEU			2	1.13287	AB	LL		.	.	.	.	.		.	.			.	.	.	.	.	.	.	.	.	.	.	.	.	.	.	.	.	.	.	.	.	.	.	.	.	.	.	.	.	.	.	.
DKB	AB	LS	2	0.869565	AB	LS		.		.	.	.	.	.	.			.	.	.	.	S	M	.	.	.	.	.	M	.	.	.	.	.	.	.	.	.	.	.	.	.	.	.	.	.	.	.	.
DUCAF			1	A	A	L		.		.		.		.				.	.	.	.	.	.	.	.	.	.	.	.	.	.	.	.	.	.	.	.	.	.	.	.	.	.	.	.	.	.	.	.
E481324			2	1.91667	AB	LL		.	.	.	.	.	.	.	.			.	.	.	.	.	.	.	.	.	.	.	.	.	.	.	.	.	.	Y	.	R	.	.	.	.	.	.	.	.	.	.	.
EA			2	0.907975	AB	LL		.	.	.	.	.	.	.	.			.	.	.	.	.	.	.	.	.	.	.	.	.	.	.	.	.	.	Y	.	R	.	.	.	.	.	.	.	K	.	.	.
EJ32B			1	A	A	LL		.		.		.		.				.	.	.	.	.	.	.	.	.	.	.	.	.	.	.	.	.	.	.	.	.	.	.	.	.	.	.	.	.	.	.	.
EK			2	1.88235	AB	LL		.	.	.	.	.	.	.	.			.	.	.	.	.	A	.	.	.	.	.	.	.	.	.	.	.	.	.	R	.	.	.	.	.	.	.	A	.	.	.	.
FPAF	AB	LL	2	0.801887	AB	LL		.	.	.	.	.	.	.	.			.	.	.	.	.	A	.	.	.	.	Y	.	.	.	.	.	.	.	.	.	.	.	.	.	.	.	.	R	.	.	.	.
HO104			2	0.789474	AB	LL		.	.	.	.	.	.	.	.			.	.	.	.	.	.	.	.	.	.	.	.	.	.	.	.	.	.	Y	.	R	.	.	.	.	.	.	.	K	.	.	.
HOR			2	1.176	AB	LS		.	.	.	.	.	.	.	.			.	.	.	.	.	M	.	.	.	.	.	.	.	.	.	.	.	.	.	.	.	.	.	.	.	.	.	.	.	.	.	.
IBW9	AB	LS	2	1.17241	AB	LS		.	.	.	.	.	.	.	.			.	.	.	.	.	M	.	.	.	.	.	.	Y	.	.	Y	.	.	.	.	.	.	.	.	.	.	.	.	.	.	.	.
ISH3			2	0.785714	AB	LL		.	.	.	.	.	.	.	.			.	.	.	.	.	.	.	.	.	.	.	.	.	.	.	.	.	.	Y	.	.	.	.	.	.	.	.	.	K	.	.	.
JBUSH	AB	LL	2	1.01724	AB	LL		.	.	.	.	.	.	.	.			.	.	.	.	.	A	.	.	.	.	Y	.	.	.	.	.	.	.	.	.	.	.	.	.	.	.	.	R	.	.	.	.
JESTHOM	AB	LL	2	2.02857	AB	LL		.	.	.	.	.	.	.	.			.	.	.	.	.	A	.	.	.	.	Y	.	.	.	.	.	.	.	.	.	.	.	.	.	.	.	.	R	.	.	.	.
JHAF	AA	LL	2	A	AA	LL		.	.	.		.		.				.	.	.	.	.	.	.	.	.	.	.	.	.	.	.	.	.	.	.	.	.	.	.	.	.	.	.	.	.	.	.	.
JO528239			2	1.9	AB	LL		.	.	.	.	.	.	.	.			.	.	.	.	.	A	.	.	.	.	Y	.	.	.	.	.	.	.	.	.	.	.	.	.	.	.	.	R	.	.	.	.
JVM	A	L	1	A	A	L		.		.		.		.				.	.	.	.	.	.	.	.	.	.	.	.	.	.	.	.	.	.	.	.	.	.	.	.	.	.	.	.	.	.	.	.
JY			2	0.545455	AB	LL		.	.	.	.	.	.	.				.	.	.	.	.	.	.	.	.	.	.	.	.	.	.	.	.	.	Y	.	R	.	.	.	.	.	.	R	.	.	.	.
KAS011			2	0.941176	AB	LL		.	.	.	.	.	.	.	.			.	.	.	.	.	A	.	.	.	.	.	.	.	.	.	.	.	.	.	.	.	.	.	.	.	.	.	A	.	.	.	.
KAS116			2	A	AA	LL		.	.	.		.	.	.				.	.	.	.	.	M	.	.	.	.	.	.	.	.	.	.	.	.	.	.	.	.	.	.	.	.	.	.	.	.	.	.
KAWASAKI			2	A	AA	LL		.	.	.		.	.	.				.	.	.	.	.	.	.	.	.	.	.	.	.	.	.	.	.	.	Y	.	R	.	.	.	.	.	.	.	T	.	.	.
KGU			3	1.03226	AAB	LLS		.		.	.	.	.	.	.			.	.	.	.	S	M	.	.	.	.	.	M	.	.	.	.	.	.	.	.	.	.	.	.	.	.	.	.	.	.	.	.
KOSE			2	1.54839	AB	LS		.	.	.	.	.	.	.	.			.	.	Y	.	.	M	.	Y	.	.	.	M	.	.	.	.	.	.	.	.	.	.	.	.	.	.	.	R	.	.	.	.
KRC005			2	0.863636	AB	LL		.	.	.	.	.	.	.	.			.	.	.	.	.	A	.	.	.	.	.	.	.	.	.	.	.	.	.	.	.	.	.	.	.	.	.	R	.	.	.	.
L0541265	B	S	1	B	B	S			.		.	.			.			.	.	.	.	.	.	.	.	.	.	.	.	.	.	.	.	.	.	T	.	A	.	.	.	.	.	.	.	.	.	.	.
L081785			1	A	A	L		.		.		.		.				.	.	.	.	.	.	.	.	.	.	.	.	.	.	.	.	.	.	.	.	.	.	.	.	.	.	.	.	.	.	.	.
LBF	AB	LS	2	1.52941	AB	LS		.	.	.	.		.	.	.			.	.	.	.	.	M	.	.	.	.	.	.	.	.	.	.	.	.	.	.	.	.	.	.	.	.	.	.	.	.	C	.
LD2B			2	1	AB	LL		.	.	.	.	.	.	.	.			.	.	.	.	.	.	.	.	.	.	.	.	.	.	.	.	.	.	Y	.	R	.	.	.	.	.	.	.	K	.	.	.
LKT3			2	1.88889	AB	LS		.		.	.	.	.	.	.			.	.	.	.	.	A	T	.	.	.	.	.	.	.	.	.	.	.	.	.	.	R	.	.	A	.	.	.	.	.	.	.
LUY			2	1.48276	AB	LL		.	.	.	.	.	.	.	.			.	.	.	.	.	A	.	.	.	.	Y	.	.	.	.	.	.	.	.	.	.	.	.	.	.	.	.	R	.	.	.	.
LWAGS			3	0.590909	ABB	LS		.	.	.	.	.	.	.	.			.	.	.	.	S	.	.	.	.	.	.	.	.	.	.	.	.	.	.	.	.	.	.	.	.	.	.	.	.	.	.	Y
LZL	ABB	LLL	2	0.560606	AB	LL		.	.	.	.	.	.	.	.			.	.	.	.	.	A	.	.	.	.	.	.	.	.	.	.	.	.	.	.	.	.	.	.	.	.	.	R	.	.	.	.
MADURA	AB	SS	2	1.52	AB	SS		.		.	.	.	.	.	.			.	.	.	.	S	.	.	.	.	.	.	M	.	.	.	.	.	.	.	.	.	.	.	.	.	.	.	.	.	.	.	.
MANIKA			2	0.578431	BB	LS		.	.	.	.	.	.	.	.			.	.	.	.	.	M	.	.	S	.	.	.	.	.	.	.	.	.	.	.	.	.	.	.	.	.	.	.	.	.	.	.
MCF			2	A	AA	LL		.		.			.	.				.	.	.	.	.	A	.	.	.	.	Y	.	.	.	.	.	.	.	.	.	.	.	.	.	.	.	.	.	.	.	.	.
MGAR			2	1.10714	AB	LL		.	.	.	.	.	.	.	.			.	.	.	.	.	.	.	.	.	.	.	.	.	.	.	.	.	.	Y	.	R	.	.	.	.	.	.	.	K	.	.	.
MOU	B	L	1	B	B	L			.		.	.			.			.	.	.	.	.	A	.	.	.	.	.	.	.	.	.	.	.	.	.	.	.	.	.	.	A	.	.	.	.	.	.	.
MT14B	AB	LL	2	1.18919	AB	LL		.	.	.	.	.	.	.	.			.	.	.	.	.	A	.	.	.	.	.	.	.	.	.	.	.	.	.	.	.	.	.	.	.	.	.	.	.	.	.	.
MZ0707			3	0.538462	ABB	LLS		.	.	.	.	.	.	.	.			.	.	.	.	S	.	.	.	.	.	.	.	.	.	.	.	.	.	.	.	.	.	.	.	.	.	.	.	.	.	.	Y
OMW			2	0.847458	AB	LS		.	.	.	.	.	.	.	.			.	.	.	.	.	M	.	.	.	.	.	.	.	Y	.	.	.	.	.	.	.	.	.	.	M	.	.	.	.	.	.	.
PF04015	B	S	1	B	B	S			.		.	.			.			.	.	.	.	.	.	.	.	.	.	.	.	.	.	.	.	.	.	T	.	A	.	.	.	.	.	.	.	.	.	.	.
PF97387			2	1.77193	AB	LL		.	.	.	.	.	.	.	.			.	.	.	.	.	A	.	.	.	.	Y	.	.	.	.	.	.	.	.	.	.	.	.	.	.	.	.	R	.	.	.	.
PGF			2	1.16316	AB	LL		.	.	.	.	.	.	.	.			.	.	.	.	.	.	.	.	.	.	.	.	.	.	.	.	.	.	Y	.	R	.	.	.	.	.	.	.	K	.	.	.
PITOUT	AB	LS	2	0.804348	AB	LS		.	.	.	.	.	.	.	.			.	.	.	.	.	M	.	.	.	.	.	.	.	Y	.	.	.	.	.	.	.	.	.	.	M	.	.	.	.	.	.	.
PLH	A	L	1	A	A	L			.	.		.			.			.	.	.	.	.	.	.	.	.	C	.	.	.	.	.	.	.	A	.	.	.	.	.	.	A	.	.	.	.	.	.	.
QBL	A	L	1	A	A	L		.		.		.		.				.	.	.	.	.	.	.	.	.	.	.	.	.	.	.	.	.	.	.	.	.	.	.	.	.	.	.	.	.	.	.	.
RML	ABB	LLL	2	0.434783	AB	LL		.	.	.	.	.	.	.	.			.	.	.	.	.	A	.	.	.	.	.	.	.	.	.	.	.	.	.	.	.	.	.	.	.	.	.	R	.	.	.	.
RSH			2	A	AA	LS		.	.	.		.			.			.	.	.	.	.	.	.	.	.	.	.	.	.	.	.	.	.	.	.	.	.	.	.	.	.	.	.	.	.	S	.	.
SA1			4	3.13793	AAAB	LLLL		.	.	.	.	.	.	.	.			.	.	.	.	.	A	.	.	.	.	T	.	.	.	.	.	.	.	.	.	.	.	.	.	.	.	.	.	.	.	.	.
SCHU			2	2.95238	AB	LL		.	.	.	.	.	.	.	.			.	.	.	.	.	.	.	.	.	.	.	.	.	.	.	.	.	.	Y	.	R	.	.	.	.	.	.	.	K	.	.	.
SLE005			2	0.422222	AB	LS		.		.	.	.	.	.	.			.	.	.	.	C	M	.	.	.	.	.	.	.	.	.	.	.	.	.	.	.	.	M	Y	.	M	./*	.	.	.	.	.
SP0010			2	A	AA	LL		.		.			.	.				.	.	.	.	.	A	.	.	.	.	Y	.	.	.	.	.	.	.	.	.	.	.	.	.	.	.	.	.	.	.	.	.
SPL	AB	LS	2	1.46154	AB	LS		.		.	.	.	.	.	.			.	.	.	.	C	M	.	.	.	.	.	M	.	.	.	.	.	.	.	.	.	.	.	.	.	.	.	.	.	.	.	.
SSTO			2	0.983806	AB	LL		.	.	.	.	.	.	.	.			S	.	.	.	.	A	.	.	.	.	.	.	.	.	.	.	.	.	.	.	.	.	.	.	.	.	.	R	.	.	.	.
STEINLIN	B	S	1	B	B	S			.		.	.			.			.	.	.	.	.	.	.	.	.	.	.	.	.	.	.	.	.	.	T	.	A	.	.	.	.	.	.	.	.	.	.	.
SWEIG			2	0.913043	AB	LL		.	.	.	.	.	.	.	.			.	.	.	.	.	A	.	.	.	.	Y	.	.	.	.	.	.	.	.	.	.	.	.	.	.	.	.	R	.	.	.	.
T7526			2	0.910448	AB	LS		.		.	.	.	.	.	.			.	.	.	.	C	M	.	.	.	.	.	M	.	.	.	.	.	.	.	.	.	.	.	.	.	.	.	.	.	.	.	.
TAB			2	0.731707	AB	LS		.		.	.	.	.	.	.			.	.	.	.	C	M	.	.	.	.	.	M	.	.	.	.	.	.	.	.	.	.	.	.	.	.	.	.	.	.	.	.
TEM			2	0.768421	AB	LL		.	.	.	.	.		.	.			.	.	.	.	.	.	.	.	.	.	.	.	.	.	.	.	.	.	.	.	.	.	.	.	.	.	.	.	.	.	.	.
TISI	AB	LL	2	0.921569	AB	LL		.	.	.	.	.	.	.	.			.	.	.	.	.	A	.	.	.	.	.	.	.	.	.	.	.	.	.	.	.	.	.	.	.	.	.	R	.	.	.	.
VAVY	B	S	1	B	B	S			.		.	.			.			.	.	.	.	.	.	.	.	.	.	.	.	.	.	.	.	.	.	T	.	A	.	.	.	.	.	.	.	.	.	.	.
WAR			3	0.649123	ABB	LLL		.	.	.	.	.	.	.	.			.	.	.	.	.	A	.	.	.	.	.	.	.	.	.	.	.	.	.	.	.	.	.	.	.	.	.	R	.	.	.	.
WDV			2	0.925926	AB	LL			.	.	.	.	.	.	.			.	.	.	.	.	A	.	.	.	.	.	.	.	.	.	.	.	.	.	.	.	.	.	.	.	.	.	R	.	.	.	.
WIN197			2	1.01176	AB	LS		.	.	.	.	.	.	.	.			.	.	.	.	.	M	.	.	.	.	.	.	.	.	.	.	.	.	.	.	.	.	.	.	.	.	.	.	.	.	.	.
WJR076D			2	1.1	AB	LS		.	.	.	.		.	.	.			.	.	Y	.	.	M	.	Y	.	.	.	.	.	.	.	.	.	.	.	.	.	.	.	.	.	.	.	.	.	.	.	.
WT100BIS	A	L	1	A	A	L		.		.			.	.				.	.	.	.	.	A	.	.	.	.	T	.	.	.	.	.	.	.	.	.	.	.	.	.	.	.	.	.	.	.	.	.
WT24	AB	LL	2	1.02703	AB	LL		.	.	.	.	.	.	.	.			.	.	.	.	.	A	.	.	.	.	Y	.	.	.	.	.	.	.	.	.	.	.	.	.	.	.	.	.	.	.	.	.
WT47D	AB	LL	2	0.962963	AB	LL		.	.	.	.	.	.	.	.			.	.	.	.	.	A	.	.	.	.	Y	.	.	.	.	.	.	.	.	.	.	.	.	.	.	.	.	R	.	.	.	.
WT49			3	1.11828	AB	LS		.	.	.	.	.	.	.	.			.	.	.	.	.	M	T	.	.	.	.	.	.	Y	.	.	.	.	.	.	.	.	.	.	M	.	.	.	.	.	.	.
WT51	AA	LL	2	A	AA	LL		.		.			.	.				.	.	.	.	.	.	.	.	.	.	.	.	.	.	.	.	.	.	.	.	.	.	.	.	.	.	.	.	.	.	.	.
YAR			2	0.888889	AB	LL			.	.	.	.	.	.	.			.	.	.	.	.	A	.	.	.	.	.	.	.	.	.	.	.	.	.	.	.	.	.	.	.	.	.	R	.	.	.	.
[truncated: 7 more columns]

## Sheet: e_C4probes
genotype	probe name	Probe sequence
C4 copy number	C4e1	ATGAGGCTGCTCTGGGGGCTGATCTGGGCATC
	C4e1rc	GATGCCCAGATCAGCCCCCAGAGCAGCCTCAT
C4A	C4Ae26	GGACCCCTGTCCAGTGTTAGACAGGAGCATG
	C4Ae26rc	CATGCTCCTGTCTAACACTGGACAGGGGTCC
C4B	C4Be26	GGACCTCTCTCCAGTGATACATAGGAGCATG
	C4Be26rc	CATGCTCCTATGTATCACTGGAGAGAGGTCC
C4L	C4Lf	ATTCCTGTCTGTGTTGGGAAAAGGACTTGTGGG
	C4Lfrc	CCCACAAGTCCTTTTCCCAACACAGACAGGAAT
	C4Lr	CCAACATGTCTGTGCATGCTGAGGCCTAGCACG
	C4Lrrc	CGTGCTAGGCCTCAGCATGCACAGACATGTTGG
C4S	C4S	ATTCCTGTCTGTACATGCTGAGGCCCAGCACAG
	C4Src	CTGTGCTGGGCCTCAGCATGTACAGACAGGAAT
1233 insertion	C4a3695ins	ACCTGTACTGGGGCTCTCAGTCACTGGTTCTCA
	C4a3695insRC	TGAGAACCAGTGACTGAGAGCCCCAGTACAGGT
1233 ref	C4a3695cons	AACCTGTACTGGGGCTCAGTCACTGGTTCTCAG
	C4a3695consRC	CTGAGAACCAGTGACTGAGCCCCAGTACAGGTT
